# Supplementary material for: A molecular video-derived foundation model for scientific drug discovery
Source: PubMed Central journal article supplement — Nat Commun. 2024 Nov 8;15:9696. doi: 10.1038/s41467-024-53742-z (PMC11549228; doi:10.1038/s41467-024-53742-z), 2024-11-08
Supplement: 41467_2024_53742_MOESM1_ESM.pdf [file 41467_2024_53742_MOESM1_ESM.pdf]

# Supporting Information

## A Molecular Video-derived Foundation Model for Scientific Drug Discovery

Xiang et al., *Nature Communications* 2024.

### Table of Contents

|                                                                      |           |
|----------------------------------------------------------------------|-----------|
| <b>Supplemental Materials and Methods</b> .....                      | <b>2</b>  |
| A. Supplementary Experiment Setup .....                              | 2         |
| A.1 Dataset details.....                                             | 2         |
| A.2 Hyperparameters of pre-training .....                            | 5         |
| A.3 Hyperparameters of finetuning .....                              | 6         |
| B. Supplementary Methods .....                                       | 7         |
| B.1 Molecular fingerprint details .....                              | 7         |
| B.2 Model details of pre-training .....                              | 9         |
| C. Supplementary Results.....                                        | 9         |
| C.1 Results on pre-training.....                                     | 9         |
| C.2 Results of different representations on 8 basic attributes ..... | 9         |
| C.3 Computational requirements of VideoMol .....                     | 11        |
| <b>Supplementary Figures</b> .....                                   | <b>12</b> |
| <b>Supplementary Tables</b> .....                                    | <b>17</b> |
| <b>Supplementary References</b> .....                                | <b>49</b> |

# Supplemental Materials and Methods

## A. Supplementary Experiment Setup

### A.1 Dataset details

#### Pretraining Dataset

PCQM4Mv2 is a quantum chemistry dataset under the PubChemQC project<sup>1</sup>, which include 3,378,606 molecules and their corresponding 3D structures calculated by DFT (Density Functional Theory). Since we generate 60 video frames per molecule, we sample 2 million molecules from them for molecular video generation for efficiency. Ultimately, we obtain a total of 120 million video frames for pre-training.

#### Drug-Target Binding Activity Prediction

**Dataset.** Following ImageMol<sup>2</sup>, we use 10 kinase targets in compound-kinase binding activity prediction and use 10 G protein coupled receptors (GPCRs) targets in ligand-GPCR binding activity prediction. 10 common biochemical kinases datasets are selected from KinomeScan database (<https://lincs.hms.harvard.edu/kinomescan/>). 10 GPCR datasets are selected from ChEMBL database (<https://www.ebi.ac.uk/chembl/>), which are the top 10 most used targets. Kinases and GPCRs are a binary classification task and a regression task, respectively. The statistical details for these datasets are provided in **Supplementary Table 31**.

## **Molecular Property Prediction**

**Dataset.** Molecular property prediction is a crucial step in drug discovery, which can greatly increase the speed of virtual screening. MoleculeNet<sup>3</sup> is a public and popular benchmark, which include a variety of drug discovery task. Here, we choose 6 classification datasets (BBBP, Tox21, HIV, BACE, SIDER and ToxCast) and 6 regression datasets (FreeSolv, ESOL, Lipophilicity, QM7, QM8 and QM9) from MoleculeNet to evaluate VideoMol. These datasets include various properties of drugs, such as pharmacology, physical chemistry, quantum chemistry and biophysics. Especially, due to the large size of HIV, QM8 and QM9 data, we only sample 5 frames at equal intervals to improve training efficiency. Note that the video format in the property prediction tasks is BGR while the other tasks are RGB, which is due to the fact that OpenCV<sup>4</sup> uses BGR format by default. Empirically, the RGB and BGR formats have only a small impact on the performance of VideoMol. The statistical details for these datasets are provided in **Supplementary Table 32**.

## **Anti-SARS-CoV-2 activity prediction**

**Dataset.** Following REDIAL-2020<sup>5</sup> and ImageMol, we use 11 anti-SARS-CoV-2 activity datasets, which are originally available from the National Center for the Advancement of Translational Science (NCATS) COVID-19 Portal. All of these datasets are a binary classification task and are evaluated using ROC-

AUC metric. The statistical details for these datasets are provided in

**Supplementary Table 33.**

### **Virtual screening on BACE1, COX-1, COX-2, EP4 targets**

**Dataset from ChEMBL database.** We first collect beta-secretase 1 (BACE1) with 6,860 molecules, cyclooxygenase 1 (COX-1) with 3,423 molecules, COX-2 with 4,988 molecules, prostaglandin E receptor 4 (EP4) with 350 molecules from ChEMBL database<sup>6</sup> for training and evaluating VideoMol. Due to the problem of non-uniform formatting of small molecules collected from the ChEMBL database, we clean the collect molecules according to the following guidelines: (1) we only retain those molecules with IC<sub>50</sub> values; (2) to obtain positive and negative samples, we use different thresholds to convert IC<sub>50</sub> to class labels. For molecules with an IC<sub>50</sub> value below the threshold, we set the label to 1 (active), otherwise we set the label to 0 (inactive). Regarding the selection of the threshold, we follow two criteria: (1) Keep the imbalance rate of positive and negative samples at around 0.6, which is obtained by dividing the number of negative samples by the number of positive samples; (2) The maximum threshold for IC<sub>50</sub> is 100. The statistical details for these targets are provided in **Supplementary Table 10.**

**External validation dataset from MedChemExpress website.** We obtain known active drugs from the MedChemExpress (MCE) website (<https://www.medchemexpress.com/>) for further virtual screening. The

MedChemExpress provides a wide range of high-quality research chemicals and biochemicals, including novel life science reagents, reference compounds and natural compounds for laboratory and scientific purposes<sup>7-9</sup>. In details, we collect drugs known to be active against BACE1 (16 drugs), COX-1 (22 drugs), COX-2 (35 drugs), EP4 (8 drugs) targets and with IC<sub>50</sub> values below the threshold as external validation set. The details for these active drugs are provided in **Supplementary Table 11**, **Supplementary Table 12**, **Supplementary Table 13** and **Supplementary Table 14**.

**External validation dataset from DrugBank database.** We virtually screened potential anti-BACE1 inhibitors from 2,500 FDA-approved drugs from the DrugBank database<sup>10</sup>. These drugs are available online from the DrugBank website (<https://go.drugbank.com/>). The data details can be found in **Supplementary Table 19**.

## **A.2 Hyperparameters of pre-training**

We describe the pre-training hyperparameters of VideoMol in **Supplementary Table 30**. We use a temperature of 0.1 for video-aware pretraining and set a learning rate of 0.01, a batch size of 256, a momentum of 0.9, and a weight decay of 1e-4 for pre-training. To evaluate the effectiveness of the pre-training task, we split 10% of the data for validation. Finally, we declare the training platform. We pre-trained VideoMol over 400k steps on a server with an Intel 6248R 48C@3.0GHz CPU and 4 NVIDIA TESLA A100 (40G) GPUs, which

took about 7 days. See **Supplementary Section C.3** for details of computational requirements in pre-training.

### A.3 Hyperparameters of finetuning

**General framework for finetuning.** We spliced a multi-layer perceptron (MLP) after the video encoder for fine-tuning downstream tasks, and its general architecture can be abstracted as shown in **Supplementary Table 34**. In detail, we use the pre-trained video encoder as the backbone to extract the features of molecular videos and input them into an MLP (dropout1→linear1→activator→dropout2→linear2) for prediction.

**Hyperparameter search space.** We use grid search to find the best combination of hyperparameters with different random seeds on downstream tasks. In compound-kinase interaction and anti-SARS-CoV-2 viral activity prediction tasks, we tune parameters independently for each seed and report the mean and variance, which means the hyperparameters of different seeds may be different. The specific search spaces are shown in **Supplementary Table 35**. In addition to the data augmentation used by VideoMol, we also try data augmentation from ImageMol in evaluation on 10 kinases. We run all fine-tuning experiments on a single Tesla A100 GPU or a single GTX 4090Ti. See **Supplementary Section C.3** for details of computational requirements in fine-tuning.

## B. Supplementary Methods

### B.1 Molecular fingerprint details

Considering the insufficient semantics of a single molecular fingerprint, we selected a total of 21 fingerprints of 6 different types for comprehensive information. We summarize all used fingerprints in **Supplementary Table 29**:

- Circular-based fingerprints: Circular-based fingerprints include ECFP<sub>*x*</sub> (Extended Connectivity Fingerprints) and FCFP<sub>*x*</sub> (Functional-Class Fingerprints), where *x* represents the bond length or diameter centered on the atom. Here, we set *x* to 0,2,4,6 and 2,4,6 for ECFP and FCFP, respectively. The ECFP is constructed based on the number of atomic connections, the number of non-hydrogen chemical bonds, the atomic number, the positive and negative of atomic charges, the absolute value of atomic charges, and the number of connected hydrogen atoms. The FCFP is constructed based on the information of pharmacophore, such as hydrogen bond acceptors, hydrogen bond donors, negatively ionizable, positively ionizable, aromatic atoms and halogens.
- Path-based fingerprints: Path-based fingerprints include RDK<sub>*x*</sub> (*x* is 5, 6 or 7), HashTT (Topological Torsion) and HashAP (Atom Pair). HashTT and HashAP are similar, which includes information in three dimensions: atomic number, electron number, and adjacent atom number.
- Substructure-based fingerprints: Substructure-based fingerprints include MACCS (Molecular ACCess System) and Avalon. MACCS fingerprints

adopts the substructure encoded by SMARTS and obtains the molecular fingerprint with a length of 167 according to the type of substructure.

Avalon fingerprints include features such as atomic symbol path, atom count, augmented symbol path, augmented atom.

- Longer version-based fingerprints: Longer version-based fingerprints enrich the fingerprint information of ECFP4, ECFP6, FCFP4, FCFP6 and LAvalon to 16384 dimensions.
- Pharmacophore-based fingerprints: We use TPATF (Topological Pharmacophore Atomic Triplets Fingerprints) as pharmacophore-based fingerprints, which were obtained using Mayachemtools<sup>11</sup>. TPATF describes the ligand sites necessary for molecular recognition of macromolecules or ligands by using pharmacophore atom types such as hydrogen bond donor (HBD), hydrogen bond acceptor (HBA), cationizable (PI), Anionizable (NI), Hydrophobic (H) and Aromatic (Ar).
- Physicochemistry-based fingerprints: We use RDKDes (RDKit Descriptors) as physicochemistry-based fingerprints, which contains experimental properties or theoretical descriptors, such as molar refractivity, logP, number of heavy atoms, number of bonds, molecular weight, topological polar surface area.



## B.2 Model details of pre-training

The **Supplementary Table 30** shows the model details in pre-training phase.

We use a 12-layer vision transformer as the video encoder of VideoMol. For the Axis classifier, rotation classifier, angle classifier and chemical classifier, we used the same neural network architecture, which consists of a fully connected layer with a Softplus activator and a task-dependent fully connected layer.

## C. Supplementary Results

### C.1 Results on pre-training

The **Supplementary Figure 3** and **Supplementary Figure 4** describe the loss curve and the corresponding accuracy curve of VideoMol in the pre-training phase, respectively. We can clearly see that the loss of each pre-training task in VideoMol is gradually decreasing, which shows that each task can work well together (**Supplementary Figure 3**). At the same time, each pre-training task achieves good accuracy on the validation set, indicating the effectiveness of VideoMol (**Supplementary Figure 4**).

### C.2 Results of different representations on 8 basic attributes

To fairly compare the effects of different representations, we evaluated the representation without using any self-supervised tasks. It is well known that

the development of drug discovery depends on accurately capturing chemical and biological representations of molecules. Here, we used several commonly used representative methods (such as GCN, GIN, EGNN, and the image representation used by ImageMol) to inspect the model's ability to understand the 8 basic attributes of molecules, including molecular weight, MolLogP, MolMR, BalabanJ, NumHAcceptors, NumHDonors, NumValenceElectrons and TPSA.

We collected the first 10,000 molecules from the pre-training dataset and used exactly the same experimental setup (batch size of 8, learning rate of 0.005, training epoch of 30, and only training task-relevant predictor) for fair comparison. In detail, we split the training set, validation set, and test set using a ratio of 8:1:1 and reported the results on the test set based on the best validation set score. As shown in **Supplementary Table 1**, we found that VideoMol using only one frame outperformed that of the 2D graph-based methods, the 3D-based graph method and the 2D image-based method, revealing the advantage of the proposed 3D representation. Specifically, compared with the second-place ImageMol without pre-training, the performance of video-1frame improved by 9.9%. When we utilized all video frames (video-60frame), the performance is further significantly improved from 12.47 to 7.51 with a 39.8% improvement rate.

In summary, the proposed 3D representation (whether based on a single frame image or a 60-frame video) has advantages compared to existing

molecular representation approaches. We will further improve our VideoMol framework by increasing the number of 3D frames and integrating other types of 3D representation (such as AlphaFold3<sup>12</sup>) in the near future.

### **C.3 Computational requirements of VideoMol**

Here, we detail the computational requirements of the pre-training, fine-tuning, and screening stages in **Supplementary Table 36**. In the pre-training phase, as shown in **Supplementary Table 36(a)**, VideoMol uses 256 frames in each batch for training, which requires 37G of GPU memory and takes about 9 hours to complete 1 epoch on 2 million molecular videos with 60 frames. Next, we use 10,000 molecules and study the impact of different batch sizes (#frame/batch) on memory and training speed in **Supplementary Table 36(b)**. We find that fine-tuning does not occupy a large amount of memory, and only requires at least 2.3G of GPU memory to complete. Finally, we evaluate the computational requirements when performing virtual screening on 1 million molecules in **Supplementary Table 36(c)**. We find that even using all frames during virtual screening, it only took about 9 hours. In addition, for ever-expanding data sizes, screening can be accelerated by reducing the number of frames. Therefore, VideoMol can complete large-scale virtual screening in a faster time.

## Supplementary Figures

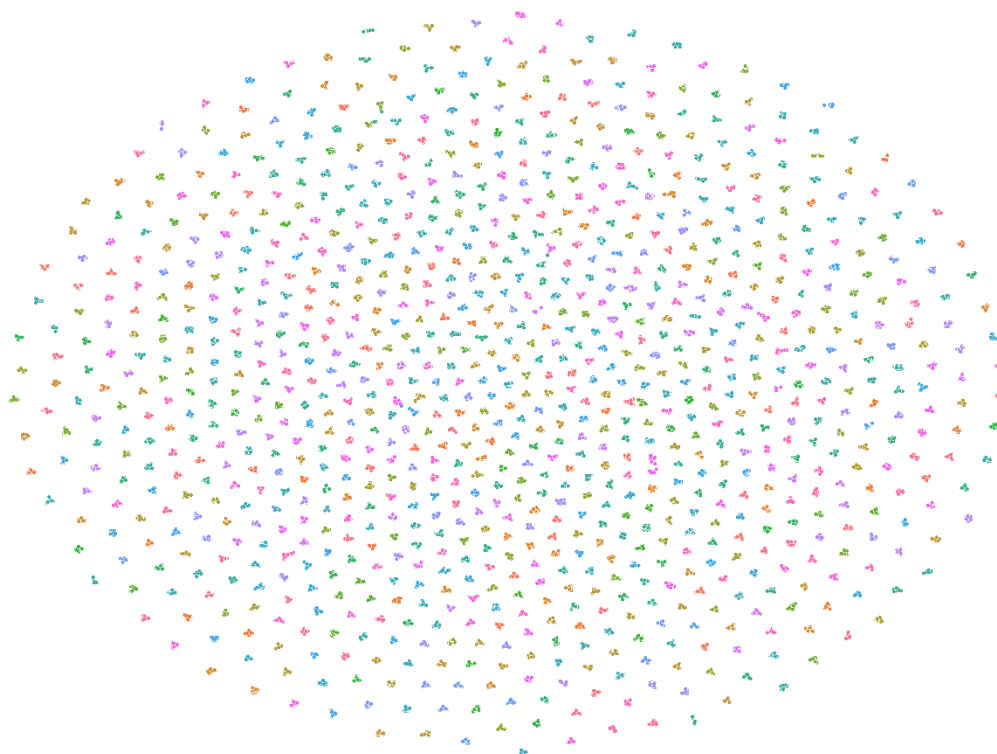

**Supplementary Figure 1:** t-SNE visualization of 1,000 molecular videos.

Different colors represent frames in different cluster videos. Different colors represent different molecules video. DB index ( $=0.182$ ) is a metric to evaluate the clustering quality, and the larger the value, the better the clustering performance.

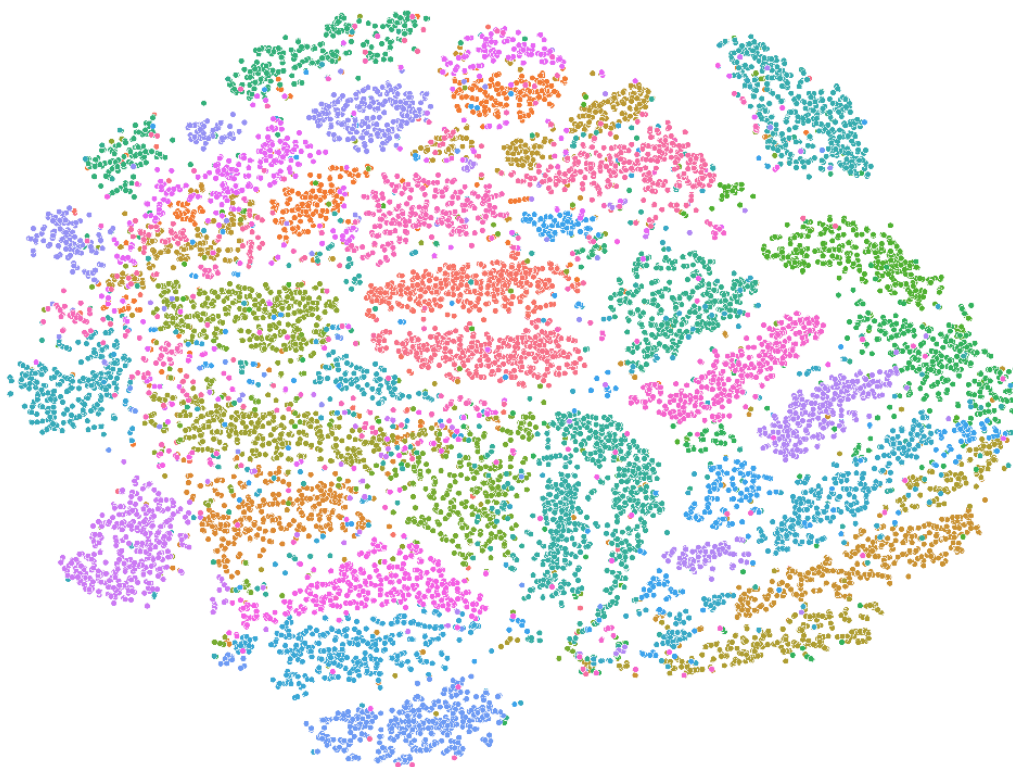

**Supplementary Figure 2:** t-SNE visualization of the representations of VideoMol. The total number of samples is 15,000 (including 30 clusters with 500 samples per cluster). Different colors represent different clusters. Davies Bouldin (DB) index ( $=3.66$ ) represents the intra-cluster distance divided by the inter-cluster distance, where the smaller the value, the better the clustering performance.

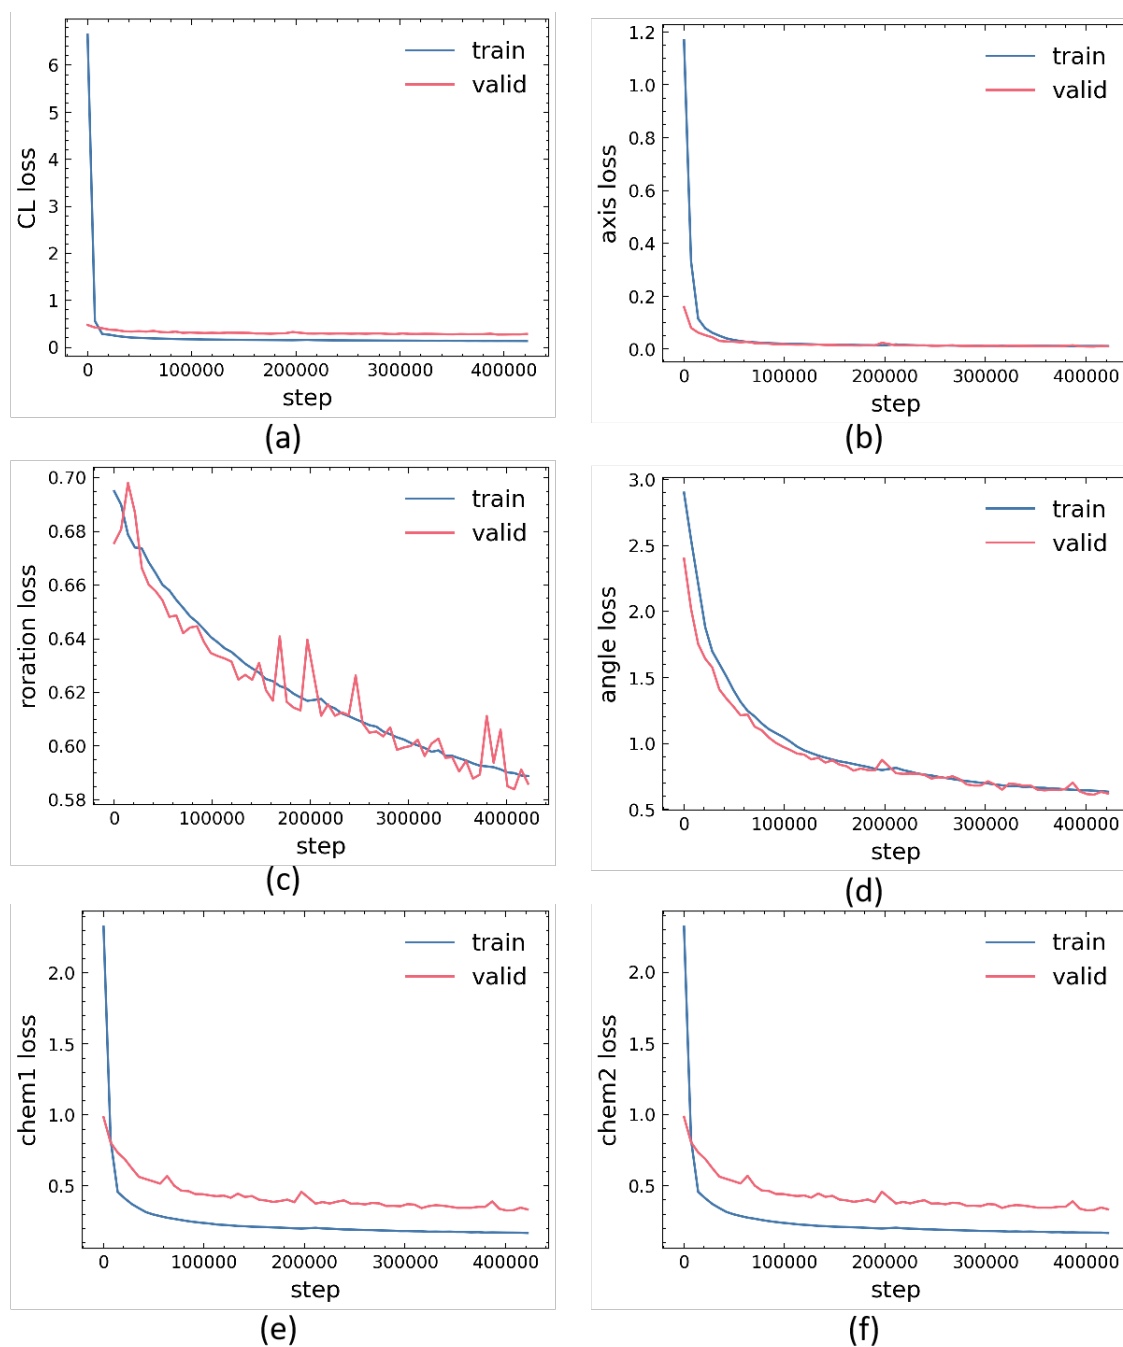

**Supplementary Figure 3:** VideoMol loss details during the pre-training phase.

The x-axis and y-axis represent the training step and loss value, respectively.

Subfigures (a)-(d) represent  $\mathcal{L}_V$ ,  $\mathcal{L}_{axis}$ ,  $\mathcal{L}_{rotation}$ ,  $\mathcal{L}_{angle}$ , respectively. The

mean of the losses for subfigures (e) and (f) represent  $\mathcal{L}_C$ .

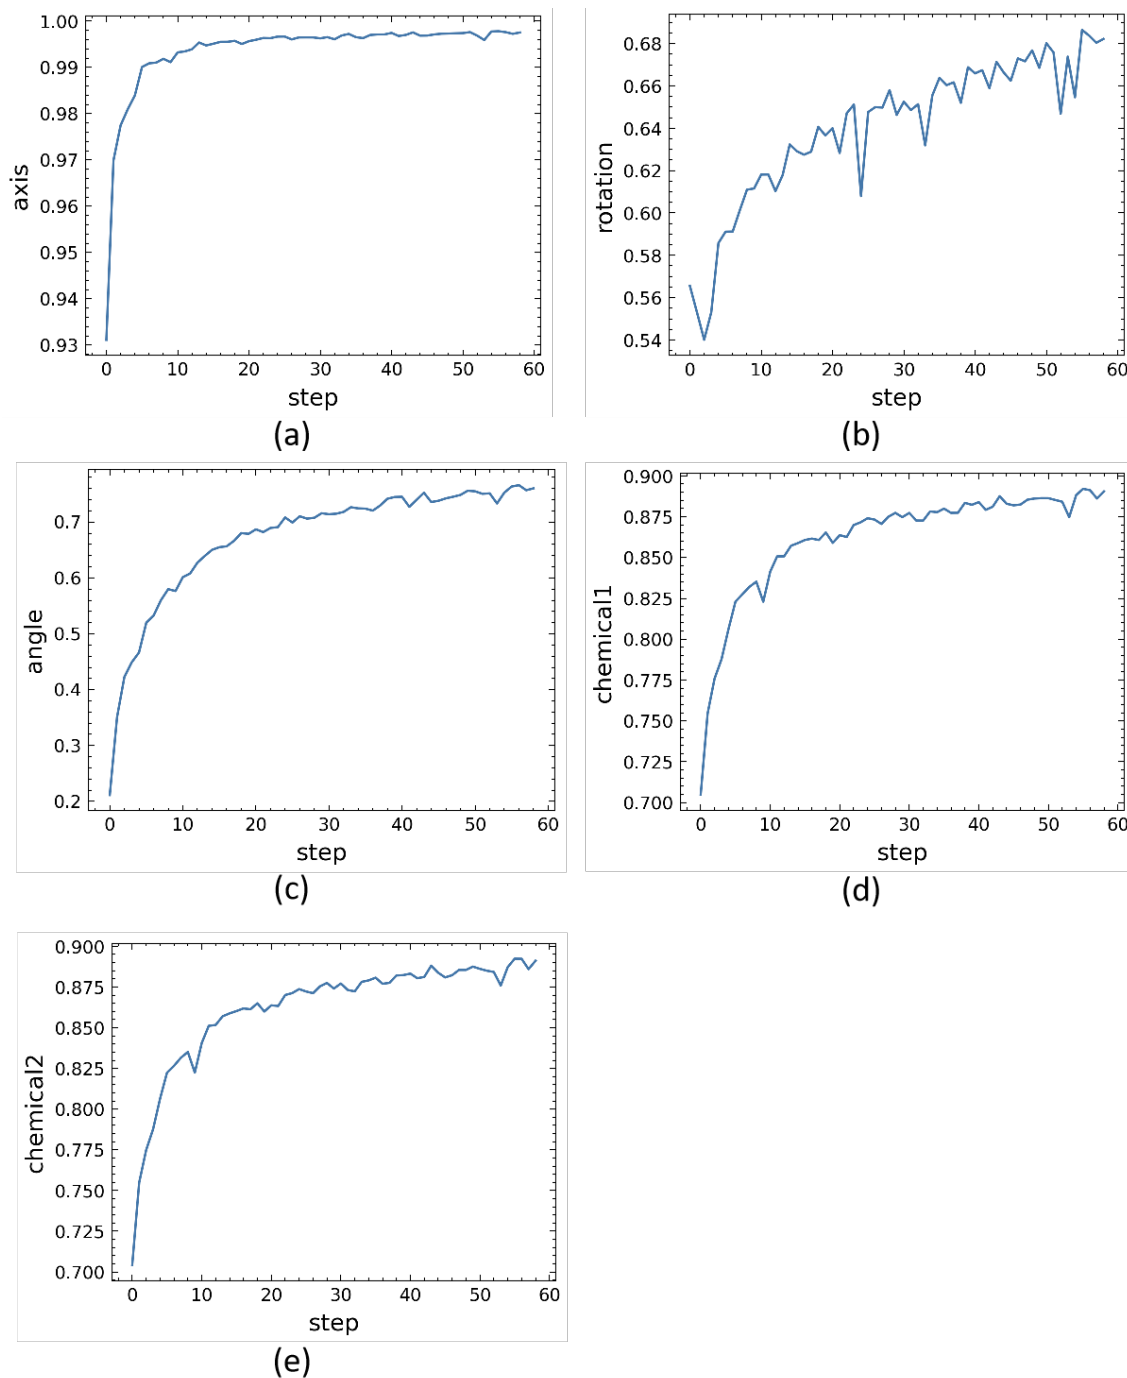

**Supplementary Figure 4:** The performance of VideoMol on validation set during the pre-training phase. The x-axis and y-axis represent the training step divided by 7,000 and accuracy, respectively. Subfigures (a)-(c) represent the performance of VideoMol on axis prediction, rotation prediction and angle prediction, respectively. The mean of the accuracy for subfigures (d) and (e)

represent performance of chemical-aware pre-training task. We evaluate the performance of VideoMol on the validation set approximately 7000 steps.



## Supplementary Tables

**Supplementary Table 1:** The RMSE results of different molecular

representations on 8 basic attributes (molecular weight, MolLogP, MolMR,

BalabanJ, NumHAcceptors, NumHDonors, NumValenceElectrons, TPSA).

(.xlsx)

|             | modality            | model    | use conformer? | prop         |
|-------------|---------------------|----------|----------------|--------------|
| graph-based | 2D graph            | GCN      | ×              | 62.304       |
|             |                     | GIN      | ×              | 62.980       |
|             |                     | EGNN     | ×              | 17.418       |
|             | 3D graph            | EGNN     | √              | 16.684       |
| image-based | image from imagemol | ResNet18 | ×              | 12.469       |
|             | video-1frame        | ResNet18 | √              | 11.237       |
|             | video-5frame        | ResNet18 | √              | 8.088        |
|             | video-60frame       | ViT      | √              | <b>7.511</b> |

**Supplementary Table 2:** Summary of state-of-the-art methods. (.xlsx)

| Representation Category | Model                     | Input  | Backbone           | Pre-training database                                                    |
|-------------------------|---------------------------|--------|--------------------|--------------------------------------------------------------------------|
| sequence                | {RNN, TRFM}_{LR, MLP, RF} | SMILES | RNN or Transformer | ChEMBL24 (0.861M)                                                        |
|                         | CHEM-BERT                 | SMILES | BERT               | PubChem (10M)                                                            |
| 2D graph                | InfoGraph                 | Graph  | GIN                | -                                                                        |
|                         | GPT-GNN                   | Graph  | HGT                | OAG (179 million nodes & 2 billion edges) and Amazon (113 million nodes) |
|                         | ContextPred               | Graph  | 5-layer GIN        | ZINC15 (2M)                                                              |
|                         | GraphLoG                  | Graph  | 5-layer GIN        | ZINC15 (2M)                                                              |
|                         | G-Contextual              | Graph  | Grover             | ZINC15 & ChEMBL (11 million)                                             |
|                         | G-Motif                   | Graph  | Grover             | ZINC15 & ChEMBL (11 million)                                             |
|                         | AD-GCL                    | Graph  | 5-layer GIN        | ZINC15 (2M)                                                              |
|                         | JOAO                      | Graph  | 5-layer GIN        | ZINC15 (2M)                                                              |
|                         | SimGRACE                  | Graph  | 5-layer GIN        | ZINC15 (2M)                                                              |
|                         | GraphCL                   | Graph  | 5-layer            | ZINC15 (2M)                                                              |

|          |            |                                 |                           |                                           |
|----------|------------|---------------------------------|---------------------------|-------------------------------------------|
|          | GraphMAE   | Graph                           | GIN<br>5-layer<br>GIN     | ZINC15 (2M)                               |
|          | MGSSL      | Graph                           | 5-layer<br>GIN            | ZINC15 (250K)                             |
|          | AttrMask   | Graph                           | 5-layer<br>GIN            | ZINC15 (2M)                               |
|          | MolCLR     | Graph                           | GCN+GI<br>N               | PubChem (10M)                             |
|          | Mole-BERT  | Graph                           | 5-layer<br>GIN            | ZINC15 (2M)                               |
|          | GraphCL    | Graph                           | 5-layer<br>GIN            | ZINC15 (2M)                               |
| 3D graph | 3D InfoMax | Geometry+<br>Graph              | PNA+N<br>et3D             | QM9(50k)+GEOM-<br>Drugs(140k)+Qmugs(620k) |
|          | GraphMVP   | Geometry+<br>Graph              | 5-layer<br>GIN+Sc<br>hNet | GEOM (50K)                                |
|          | Uni-Mol    | Geometry+<br>Protein<br>Pockets | Transfor<br>mer           | ZINC/ChemBL+PDB (209 M)                   |
| image    | ImageMol   | Image                           | ResNet1<br>8              | PubChem (10M)                             |

**Supplementary Table 3:** The ROC-AUC performance of different methods on 10 main types of biochemical kinases from KinomeScan datasets with balanced scaffold split. All compared results are obtained from ImageMol.

(.xlsx)

|                      | BTK                | CDK4-cyclinD3      | EGFR               | FGFR1              | FGFR2              |         |
|----------------------|--------------------|--------------------|--------------------|--------------------|--------------------|---------|
| MoCLRGIN             | 0.556±0.118        | 0.778±0.171        | 0.583±0.067        | 0.695±0.249        | 0.667±0.132        |         |
| MoCLRGCN             | 0.602±0.129        | 0.944±0.039        | 0.750±0.051        | 0.619±0.378        | 0.667±0.052        |         |
| RNN_LR               | 0.611±0.000        | 0.667±0.000        | 0.536±0.000        | 0.771±0.000        | 0.741±0.000        |         |
| TRFM_LR              | 0.694±0.000        | 0.750±0.000        | 0.821±0.000        | 0.743±0.000        | 0.704±0.000        |         |
| RNN_MLP              | 0.556±0.023        | 0.833±0.000        | 0.536±0.029        | 0.848±0.059        | 0.716±0.046        |         |
| TRFM_MLP             | 0.537±0.013        | 0.639±0.039        | 0.667±0.061        | 0.643±0.031        | 0.741±0.000        |         |
| RNN_RF               | 0.546±0.013        | 0.917±0.000        | 0.548±0.017        | 0.476±0.027        | 0.685±0.055        |         |
| TRFM_RF              | 0.639±0.039        | 0.639±0.039        | 0.607±0.000        | 0.476±0.013        | 0.556±0.030        |         |
| CHEM-BERT            | 0.648±0.013        | 0.583±0.297        | 0.845±0.094        | 0.429±0.117        | 0.765±0.106        |         |
| ImageMol             | 0.843±0.026        | 0.917±0.068        | 0.857±0.000        | <b>0.857±0.023</b> | 0.852±0.052        |         |
| VideoMol             | <b>0.861±0.023</b> | <b>0.972±0.039</b> | <b>0.905±0.017</b> | 0.848±0.027        | <b>0.988±0.017</b> |         |
| ----- Continue ----- |                    |                    |                    |                    |                    |         |
|                      | FGFR3              | FGFR4              | FLT3               | KPCD3              | MET                | Average |
| MoCLRGIN             | 0.760±0.039        | 0.773±0.121        | 0.722±0.091        | 0.571±0.107        | 0.611±0.236        | 0.6716  |
| MoCLRGCN             | 0.792±0.106        | 0.537±0.013        | 0.722±0.208        | 0.505±0.067        | 0.574±0.052        | 0.6712  |
| RNN_LR               | 0.646±0.015        | 0.528±0.000        | 0.778±0.000        | 0.457±0.000        | 0.796±0.026        | 0.6531  |

|           |                    |                    |                    |                    |                    |               |
|-----------|--------------------|--------------------|--------------------|--------------------|--------------------|---------------|
| TRFM_LR   | 0.812±0.000        | 0.639±0.000        | 0.611±0.000        | 0.438±0.027        | 0.778±0.000        | 0.6990        |
| RNN_MLP   | 0.469±0.026        | 0.269±0.035        | 0.630±0.105        | 0.410±0.036        | 0.667±0.045        | 0.5934        |
| TRFM_MLP  | 0.802±0.015        | 0.676±0.035        | 0.667±0.136        | 0.219±0.027        | 0.556±0.000        | 0.6147        |
| RNN_RF    | 0.312±0.000        | 0.389±0.000        | 0.519±0.026        | 0.343±0.000        | 0.500±0.000        | 0.5235        |
| TRFM_RF   | 0.646±0.078        | 0.602±0.013        | 0.546±0.035        | 0.262±0.058        | 0.593±0.026        | 0.5566        |
| CHEM-BERT | 0.438±0.077        | 0.528±0.060        | 0.574±0.189        | 0.557±0.091        | 0.944±0.000        | 0.6311        |
| ImageMol  | 0.854±0.064        | 0.833±0.045        | 0.722±0.120        | 0.762±0.088        | <b>0.963±0.026</b> | 0.8460        |
| VideoMol  | <b>0.896±0.039</b> | <b>0.852±0.080</b> | <b>0.981±0.026</b> | <b>0.867±0.036</b> | <b>0.963±0.026</b> | <b>0.9133</b> |

**Supplementary Table 4:** The RMSE and MAE performance of different methods on 10 GPCR with balanced scaffold split. The lower the value, the better the performance. All compared results are obtained from ImageMol.

(.xlsx)

|           | 1. 5HT1A           |                    | 2. 5HT2A           |                    | 3. AA1R            |                    |
|-----------|--------------------|--------------------|--------------------|--------------------|--------------------|--------------------|
|           | RMSE               | MAE                | RMSE               | MAE                | RMSE               | MAE                |
| MoCLRGIN  | 0.850±0.021        | 0.670±0.012        | 0.853±0.019        | 0.642±0.014        | 0.786±0.015        | 0.588±0.009        |
| MoCLRGCN  | 0.949±0.027        | 0.764±0.014        | 0.875±0.008        | 0.681±0.024        | 0.856±0.026        | 0.662±0.026        |
| RNN_LR    | 1.574±0.091        | 0.937±0.019        | 1.602±0.245        | 1.103±0.151        | 1.073±0.087        | 0.762±0.057        |
| TRFM_LR   | 1.636±0.004        | 1.109±0.001        | 1.389±0.000        | 0.999±0.001        | 1.060±0.003        | 0.810±0.001        |
| RNN_MLP   | 0.957±0.013        | 0.768±0.010        | 1.167±0.010        | 0.890±0.003        | 0.848±0.004        | 0.662±0.008        |
| TRFM_MLP  | 0.939±0.034        | 0.730±0.025        | 1.013±0.026        | 0.728±0.021        | 0.878±0.051        | 0.657±0.031        |
| RNN_RF    | 0.788±0.004        | 0.617±0.004        | 1.001±0.001        | 0.747±0.001        | 0.717±0.003        | 0.554±0.002        |
| TRFM_RF   | 0.855±0.001        | 0.672±0.001        | 1.011±0.002        | 0.777±0.002        | 0.740±0.001        | 0.568±0.001        |
| CHEM-BERT | 0.876±0.018        | 0.706±0.012        | 0.909±0.057        | 0.682±0.056        | 0.734±0.038        | 0.544±0.027        |
| ImageMol  | 0.776±0.012        | 0.620±0.014        | 0.780±0.017        | <b>0.578±0.022</b> | 0.711±0.012        | 0.554±0.009        |
| VideoMol  | <b>0.708±0.017</b> | <b>0.547±0.015</b> | <b>0.775±0.017</b> | <b>0.578±0.009</b> | <b>0.655±0.007</b> | <b>0.496±0.006</b> |
|           | 4. AA2AR           |                    | 5. AA3R            |                    | 6. CNR2            |                    |
|           | RMSE               | MAE                | RMSE               | MAE                | RMSE               | MAE                |
| MoCLRGIN  | 0.748±0.012        | 0.588±0.008        | 0.840±0.014        | 0.692±0.010        | 0.926±0.047        | 0.758±0.036        |
| MoCLRGCN  | 0.819±0.011        | 0.651±0.008        | 0.855±0.010        | 0.700±0.011        | 0.978±0.023        | 0.803±0.021        |
| RNN_LR    | 1.801±0.600        | 1.193±0.335        | 2.295±0.463        | 1.190±0.155        | 5.505±0.093        | 1.611±0.032        |
| TRFM_LR   | 1.130±0.000        | 0.906±0.000        | 1.155±0.001        | 0.919±0.001        | 1.700±0.001        | 1.213±0.000        |
| RNN_MLP   | 0.967±0.002        | 0.773±0.005        | 0.883±0.010        | 0.707±0.012        | 1.091±0.015        | 0.881±0.013        |
| TRFM_MLP  | 0.948±0.013        | 0.744±0.005        | 0.945±0.010        | 0.749±0.014        | 1.144±0.055        | 0.903±0.038        |
| RNN_RF    | 0.887±0.002        | 0.692±0.001        | 0.796±0.009        | 0.624±0.007        | 0.965±0.002        | 0.766±0.001        |
| TRFM_RF   | 0.926±0.003        | 0.735±0.004        | 0.856±0.001        | 0.701±0.002        | 0.965±0.002        | 0.800±0.002        |
| CHEM-BERT | 0.862±0.071        | 0.674±0.058        | 0.861±0.058        | 0.684±0.047        | 0.925±0.051        | 0.727±0.041        |
| ImageMol  | 0.734±0.015        | 0.573±0.009        | 0.793±0.008        | 0.634±0.001        | 0.905±0.004        | 0.717±0.015        |
| VideoMol  | <b>0.712±0.011</b> | <b>0.543±0.005</b> | <b>0.786±0.006</b> | <b>0.617±0.004</b> | <b>0.864±0.005</b> | <b>0.679±0.010</b> |
|           | 7. DRD2            |                    | 8. DRD3            |                    | 9. HRH3            |                    |
|           | RMSE               | MAE                | RMSE               | MAE                | RMSE               | MAE                |
| MoCLRGIN  | 0.814±0.009        | 0.591±0.007        | 0.858±0.017        | 0.673±0.022        | 0.734±0.006        | 0.581±0.004        |
| MoCLRGCN  | 0.855±0.022        | 0.634±0.017        | 0.914±0.024        | 0.725±0.025        | 0.740±0.016        | 0.576±0.006        |

|           |                    |                    |                    |                    |                    |                    |
|-----------|--------------------|--------------------|--------------------|--------------------|--------------------|--------------------|
| RNN_LR    | 1.142±0.077        | 0.839±0.038        | 1.316±0.011        | 0.942±0.005        | 1.616±0.236        | 0.943±0.070        |
| TRFM_LR   | 1.000±0.000        | 0.719±0.000        | 1.219±0.000        | 0.914±0.000        | 1.169±0.002        | 0.911±0.002        |
| RNN_MLP   | 0.895±0.006        | 0.694±0.005        | 1.021±0.007        | 0.819±0.007        | 0.871±0.015        | 0.702±0.011        |
| TRFM_MLP  | 0.919±0.016        | 0.686±0.016        | 1.012±0.041        | 0.790±0.023        | 0.863±0.011        | 0.676±0.009        |
| RNN_RF    | 0.837±0.001        | 0.612±0.001        | 0.861±0.001        | 0.685±0.001        | 0.771±0.002        | 0.613±0.002        |
| TRFM_RF   | 0.864±0.001        | 0.636±0.002        | 0.904±0.001        | 0.717±0.001        | 0.770±0.002        | 0.602±0.001        |
| CHEM-BERT | 0.816±0.011        | 0.587±0.013        | 0.803±0.029        | 0.631±0.026        | 0.770±0.033        | 0.594±0.022        |
| ImageMol  | 0.772±0.014        | 0.573±0.009        | 0.735±0.018        | 0.576±0.014        | 0.710±0.006        | 0.561±0.006        |
| VideoMol  | <b>0.742±0.003</b> | <b>0.556±0.005</b> | <b>0.715±0.014</b> | <b>0.554±0.012</b> | <b>0.668±0.008</b> | <b>0.506±0.002</b> |

#### 10. OPRM

|           | RMSE               | MAE                |
|-----------|--------------------|--------------------|
| MoCLRGIN  | 0.856±0.008        | 0.664±0.016        |
| MoCLRGCN  | 0.853±0.009        | 0.653±0.020        |
| RNN_LR    | 2.649±1.024        | 1.744±0.614        |
| TRFM_LR   | 1.694±0.001        | 1.282±0.000        |
| RNN_MLP   | 1.022±0.014        | 0.781±0.008        |
| TRFM_MLP  | 1.084±0.009        | 0.849±0.007        |
| RNN_RF    | 0.876±0.010        | 0.671±0.009        |
| TRFM_RF   | 0.852±0.002        | 0.660±0.003        |
| CHEM-BERT | 0.893±0.024        | 0.672±0.019        |
| ImageMol  | 0.849±0.018        | 0.645±0.015        |
| VideoMol  | <b>0.795±0.015</b> | <b>0.579±0.011</b> |

**Supplementary Table 5:** The ROC-AUC performance (%) of different methods on 6 molecular property prediction benchmarks with scaffold split. All experiments are run 10 times using random seeds from 0 to 9. GraphMVP-C, Mole-BERT, Uni-Mol and ImageMol are reproduced from their source code and other results from Mole-BERT. (.xlsx)

|              | Tox21      | ToxCast    | Sider      | HIV        | BBBP              | BACE       |
|--------------|------------|------------|------------|------------|-------------------|------------|
| #Molecules   | 7831       | 8576       | 1427       | 41127      | 2039              | 1513       |
| #Task        | 12         | 617        | 27         | 1          | 1                 | 1          |
| InfoGraph    | 73.3 (0.6) | 61.8 (0.4) | 58.7 (0.6) | 74.2 (0.9) | 68.7 (0.6)        | 74.3 (2.6) |
| GPT-GNN      | 74.9 (0.3) | 62.5 (0.4) | 58.1 (0.3) | 65.2 (2.1) | 64.5 (1.4)        | 77.9 (3.2) |
| ContextPred  | 73.6 (0.3) | 62.6 (0.6) | 59.7 (1.8) | 75.6 (1.0) | 70.6 (1.5)        | 78.8 (1.2) |
| GraphLoG     | 75.0 (0.6) | 63.4 (0.6) | 59.6 (1.9) | 76.1 (0.8) | 68.7 (1.6)        | 78.6 (1.0) |
| G-Contextual | 75.0 (0.6) | 62.8 (0.7) | 58.7 (1.0) | 76.3 (1.5) | 69.9 (2.1)        | 79.3 (1.1) |
| G-Motif      | 73.6 (0.7) | 62.3 (0.6) | 61.0 (1.5) | 73.8 (1.2) | 66.9 (3.1)        | 73.0 (3.3) |
| AD-GCL       | 74.9 (0.4) | 63.4 (0.7) | 61.5 (0.9) | 76.7 (1.2) | 70.7 (0.3)        | 76.6 (1.5) |
| JOAO         | 74.8 (0.6) | 62.8 (0.7) | 60.4 (1.5) | 76.9 (0.7) | 66.4 (1.0)        | 73.2 (1.6) |
| SimGRACE     | 74.4 (0.3) | 62.6 (0.7) | 60.2 (0.9) | 75.0 (0.6) | <b>71.2 (1.1)</b> | 74.9 (2.0) |

|                   |                   |                   |                   |                   |                   |                   |
|-------------------|-------------------|-------------------|-------------------|-------------------|-------------------|-------------------|
| GraphCL           | 75.1 (0.7)        | 63.0 (0.4)        | 59.8 (1.3)        | 75.1 (0.7)        | 67.8 (2.4)        | 74.6 (2.1)        |
| GraphMAE          | 75.2 (0.9)        | 63.6 (0.3)        | 60.5 (1.2)        | 76.8 (0.6)        | <b>71.2 (1.0)</b> | 78.2 (1.5)        |
| 3D InfoMax        | 74.5 (0.7)        | 63.5 (0.8)        | 56.8 (2.1)        | 76.1 (1.3)        | 69.1 (1.2)        | 78.6 (1.9)        |
| MGSSL             | 75.2 (0.6)        | 63.3 (0.5)        | 61.6 (1.0)        | 75.8 (0.4)        | 68.8 (0.6)        | 78.8 (0.9)        |
| AttrMask          | 75.1 (0.9)        | 63.3 (0.6)        | 60.5 (0.9)        | 75.3 (1.5)        | 65.2 (1.4)        | 77.8 (1.8)        |
| MolCLR            | 75.5 (0.5)        | 63.9 (0.5)        | 60.3 (1.3)        | 74.4 (1.3)        | 66.8 (3.4)        | 75.3 (2.9)        |
| GraphMVP-C        | 74.6( 0.4)        | 63.4 (0.6)        | 60.6 (1.3)        | 77.1 (2.1)        | 69.9 (1.4)        | 79.6 (1.7)        |
| ImageMol          | 75.5 (1.0)        | 65.6 (0.9)        | 64.9 (1.3)        | 76.8 (1.3)        | 70.5 (1.3)        | 78.1 (3.5)        |
| Uni-Mol (1 conf)  | 78.3 (0.4)        | 68.7 (0.5)        | 63.7 (1.3)        | 79.2 (1.0)        | 69.6 (2.0)        | 81.0 (3.9)        |
| Uni-Mol (10 conf) | <b>78.8 (0.7)</b> | <b>69.0 (0.5)</b> | 63.6 (1.4)        | 79.2 (0.9)        | 69.9 (2.7)        | 81.7 (3.4)        |
| Mole-BERT         | 77.0 (0.3)        | 64.4 (0.2)        | 63.2 (0.7)        | 77.7 (0.7)        | 65.7 (2.3)        | 80.2 (0.9)        |
| VideoMol          | <b>78.8 (0.4)</b> | <u>66.7 (0.5)</u> | <b>66.3 (0.9)</b> | <b>79.4 (0.5)</b> | <u>70.7 (1.5)</u> | <b>82.4 (0.9)</b> |
| Rank              | 1                 | 2                 | 1                 | 1                 | 3                 | 1                 |

**Supplementary Table 6:** The RMSE or MAE performance of different methods on 6 molecular property prediction benchmarks with scaffold split. All experiments are run 10 times using random seeds from 0 to 9. We report RMSE for FreeSolv, ESOL and Lipo datasets and MAE for QM7 and QM8, QM9 datasets, respectively. We reproduced all comparison methods using the same settings. We use GIN backbone for MolCLR because it achieves the best results. (.xlsx)

| RMSE       | FreeSolv                      | ESOL                          | Lipo                          | QM7                 | QM8                               | QM9                               |
|------------|-------------------------------|-------------------------------|-------------------------------|---------------------|-----------------------------------|-----------------------------------|
| GraphMVP   | 2.559±0.15<br>8               | 1.322±0.06<br>2               | 0.773±0.01<br>6               | 120.344±6.23<br>7   | 0.02049±0.0003<br>2               | <b>0.00891±0.0001</b><br><b>0</b> |
| EdgePred   | 2.843±0.09<br>1               | 1.367±0.04<br>1               | 0.778±0.01<br>3               | 104.387±3.29<br>2   | 0.02058±0.0006<br>1               | 0.00929±0.0000<br>9               |
| GraphMVP-C | 2.766±0.19<br>9               | 1.333±0.05<br>5               | 0.768±0.01<br>3               | 121.022±5.69<br>9   | 0.02022±0.0004<br>7               | <u>0.00896±0.0001</u><br><u>1</u> |
| MolCLR     | 3.112±0.63<br>8               | 1.462±0.06<br>8               | 0.799±0.01<br>8               | 144.426±6.59<br>1   | 0.03598±0.0008<br>5               | 0.01488±0.0002<br>0               |
| ImageMol   | 2.113±0.23<br>5               | 0.964±0.06<br>7               | <b>0.702±0.06</b><br><b>0</b> | 116.384±8.44<br>5   | 0.02419±0.0003<br>3               | 0.02061±0.0001<br>9               |
| Mole-BERT  | 2.988±0.15<br>5               | 1.115±0.01<br>7               | <u>0.727±0.00</u><br><u>6</u> | 101.922±2.33<br>1   | 0.02073±0.0003<br>3               | 0.00910±0.0001<br>0               |
| VideoMol   | <b>1.725±0.05</b><br><b>3</b> | <b>0.866±0.01</b><br><b>7</b> | 0.743±0.00<br>9               | <b>76.436±1.561</b> | <b>0.01890±0.0002</b><br><b>0</b> | <u>0.00896±0.0000</u><br><u>3</u> |

**Supplementary Table 7: The ROC-AUC performance of different methods**

on 11 SARS-CoV-2 datasets with balanced scaffold split. All compared results are obtained from ImageMol. (.xlsx)

|                 | 3CL                         | ACE2                        | hCYT<br>OX                  | MERS-<br>PPE_c<br>s         | MER<br>S-<br>PPE            | CoV1-<br>PPE_c<br>s         | CoV1<br>-PPE                | CPE                         | Cytot<br>ox                 | Alpha<br>LISA               | TruHit                      | M<br>ea<br>n |
|-----------------|-----------------------------|-----------------------------|-----------------------------|-----------------------------|-----------------------------|-----------------------------|-----------------------------|-----------------------------|-----------------------------|-----------------------------|-----------------------------|--------------|
| REDIAL-<br>2020 | 0.713                       | 0.753                       | 0.710                       | 0.703                       | 0.696                       | 0.661                       | 0.665                       | 0.651                       | 0.688                       | 0.79                        | 0.734                       | 0.706        |
| Image<br>Mol    | <b>0.762</b><br>$\pm 0.007$ | 0.720<br>$\pm 0.001$        | 0.727<br>$\pm 0.009$        | 0.771<br>$\pm 0.009$        | 0.773<br>$\pm 0.011$        | 0.775<br>$\pm 0.005$        | 0.703<br>$\pm 0.008$        | 0.669<br>$\pm 0.011$        | 0.728<br>$\pm 0.001$        | 0.793<br>$\pm 0.007$        | 0.806<br>$\pm 0.006$        | 0.748        |
| Video<br>Mol    | 0.709<br>$\pm 0.006$        | <b>0.759</b><br>$\pm 0.025$ | <b>0.765</b><br>$\pm 0.003$ | <b>0.828</b><br>$\pm 0.027$ | <b>0.814</b><br>$\pm 0.004$ | <b>0.836</b><br>$\pm 0.029$ | <b>0.737</b><br>$\pm 0.007$ | <b>0.747</b><br>$\pm 0.013$ | <b>0.761</b><br>$\pm 0.002$ | <b>0.841</b><br>$\pm 0.004$ | <b>0.862</b><br>$\pm 0.002$ | <b>0.787</b> |

**Supplementary Table 8: The uncertainty intervals with 95% confidence**

intervals of ImageMol and VideoMol on 10 ligand-GPCR binding activity

prediction datasets. UI( $\cdot$ ) represents the uncertainty intervals and

“Improvement” represents the relative performance improvement of VideoMol

compared to ImageMol. (.xlsx)

| Dataset | UI(RMSE)          |                   |             | UI(MAE)           |                   |             |
|---------|-------------------|-------------------|-------------|-------------------|-------------------|-------------|
|         | ImageMol          | VideoMol          | Improvement | ImageMol          | VideoMol          | Improvement |
| 5HT1A   | 0.782 $\pm$ 0.057 | 0.719 $\pm$ 0.059 | 8.06%       | 0.629 $\pm$ 0.048 | 0.550 $\pm$ 0.046 | 12.56%      |
| 5HT2A   | 0.816 $\pm$ 0.109 | 0.810 $\pm$ 0.102 | 0.74%       | 0.587 $\pm$ 0.059 | 0.583 $\pm$ 0.059 | 0.68%       |
| AA1R    | 0.718 $\pm$ 0.062 | 0.662 $\pm$ 0.068 | 7.80%       | 0.559 $\pm$ 0.045 | 0.499 $\pm$ 0.046 | 10.73%      |
| AA2AR   | 0.739 $\pm$ 0.055 | 0.714 $\pm$ 0.056 | 3.38%       | 0.575 $\pm$ 0.045 | 0.544 $\pm$ 0.045 | 5.39%       |
| AA3R    | 0.796 $\pm$ 0.056 | 0.795 $\pm$ 0.065 | 0.13%       | 0.632 $\pm$ 0.051 | 0.622 $\pm$ 0.053 | 1.58%       |
| CNR2    | 0.916 $\pm$ 0.073 | 0.878 $\pm$ 0.072 | 4.15%       | 0.722 $\pm$ 0.060 | 0.686 $\pm$ 0.064 | 4.99%       |
| DRD2    | 0.779 $\pm$ 0.060 | 0.749 $\pm$ 0.053 | 3.85%       | 0.574 $\pm$ 0.041 | 0.559 $\pm$ 0.040 | 2.61%       |
| DRD3    | 0.738 $\pm$ 0.053 | 0.704 $\pm$ 0.054 | 4.61%       | 0.580 $\pm$ 0.044 | 0.548 $\pm$ 0.042 | 5.52%       |
| HRH3    | 0.747 $\pm$ 0.067 | 0.669 $\pm$ 0.061 | 10.44%      | 0.582 $\pm$ 0.050 | 0.507 $\pm$ 0.047 | 12.89%      |
| OPRM    | 0.898 $\pm$ 0.089 | 0.797 $\pm$ 0.075 | 11.25%      | 0.667 $\pm$ 0.065 | 0.584 $\pm$ 0.062 | 12.44%      |

**Supplementary Table 9: The uncertainty intervals with 95% confidence**

intervals of ImageMol and VideoMol on 11 SARS-CoV-2 viral activity

prediction datasets. UI( $\cdot$ ) represents the uncertainty intervals and

“Improvement” represents the relative performance improvement of VideoMol compared to ImageMol. (.xlsx)

| Dataset     | UI(AUC)     |              |             |
|-------------|-------------|--------------|-------------|
|             | ImageMol    | VideoMol     | Improvement |
| 3CL         | 0.685±0.117 | 0.710±0.110  | 3.65%       |
| ACE2        | 0.658±0.133 | 0.763±0.112  | 15.96%      |
| hCYTOX      | 0.736±0.087 | 0.760±0.087  | 3.26%       |
| MERS-PPE_cs | 0.727±0.119 | 0.817±0.103  | 12.38%      |
| MERS-PPE    | 0.720±0.082 | 0.799±0.0743 | 10.97%      |
| CoV1-PPE_cs | 0.688±0.115 | 0.832±0.098  | 20.93%      |
| CoV1-PPE    | 0.701±0.063 | 0.736±0.060  | 4.99%       |
| CPE         | 0.646±0.084 | 0.736±0.077  | 13.93%      |
| Cytotox     | 0.729±0.051 | 0.760±0.054  | 4.25%       |
| AlphaLISA   | 0.762±0.062 | 0.836±0.049  | 9.71%       |
| TruHit      | 0.772±0.059 | 0.855±0.046  | 10.75%      |

**Supplementary Table 10:** Basic statistical information of 4 common targets (beta-secretase 1 [BACE1], cyclooxygenase 1 [COX-1], COX-2, prostaglandin E receptor 4 [EP4]) collected from ChEMBL database. #Train, #Val and #Test represent the numbers of train set, valid set, and test set, respectively. IC50 thresh (nM) represents the dividing value between positive and negative samples, where those below the threshold are positive samples, and those above the threshold are negative samples. #Pos and #Neg represent the number of positive samples and the number of negative samples, respectively. Imbalanced ratio reflects the degree of class imbalance, which is calculated by dividing the number of negative samples by the number of positive samples. #Tasks represents the number of binary prediction task.

|        | BACE1 | COX-1 | COX-2 | EP4 |
|--------|-------|-------|-------|-----|
| #Train | 5488  | 2737  | 3990  | 280 |

|                  |           |          |           |         |
|------------------|-----------|----------|-----------|---------|
| #Val             | 686       | 343      | 499       | 35      |
| #Test            | 686       | 343      | 499       | 35      |
| IC50 thresh (nM) | 80        | 100      | 100       | 30      |
| #Pos/#Neg        | 2563/4297 | 142/3281 | 1006/3982 | 133/217 |
| Imbalanced ratio | 0.597     | 0.043    | 0.253     | 0.613   |
| #Tasks           | 1         |          |           |         |
| Metric           | ROC-AUC   |          |           |         |

**Supplementary Table 11:** The anti-BACE1 drugs with an IC50 threshold of 80 from MedChemExpress website. The cas is the unique identifier for a drug.

(.xlsx)

| index | name               | cas          | IC50(nM) | canonical smiles                                                                          |
|-------|--------------------|--------------|----------|-------------------------------------------------------------------------------------------|
| 1     | BACE-1 inhibitor 2 | 2563970-92-1 | 1.5      | <chem>C[C@H]1C[C@H]2CC(F)(F)C(N)=N[C@@]2(c2cc(NC(=O)c3cnc(OCF)cn3)ccc2F)CO1</chem>        |
| 2     | BACE-1 inhibitor 1 | 1262858-14-9 | 56       | <chem>NC1=N[C@@](c2cc(NC(=O)c3ccc(Br)cn3)ccc2F)(C(F)F)COC1</chem>                         |
| 3     | BACE1-IN-13        | 1397683-26-9 | 2.9      | <chem>COc1cnc(C(=O)Nc2ccc(F)c([C@]3(C)Cn4nc(C#N)cc4C(N)=N3)c2)cn1</chem>                  |
| 4     | BACE1-IN-1         | 1310347-50-2 | 32       | <chem>C[C@]1(c2cc(NC(=O)c3ccc(C#N)cn3)ccc2F)N=C(N)OCC1(F)F</chem>                         |
| 5     | BACE1-IN-6         | 2079945-75-6 | 1.5      | <chem>C[C@]1(c2cc(/C=C(\F)c3ccc(C#N)cn3)ccc2F)N=C(N)S[C@@]2(C(=O)N3CCOCC3)C[C@H]21</chem> |
| 6     | BACE1-IN-4         | 2361157-92-6 | 3.8      | <chem>C[C@]1(c2cc(NC(=O)c3cnc(OCF)cn3)ccc2F)N=C(N)SCC12CCS(=O)(=O)CC2</chem>              |
| 7     | BACE1-IN-2         | 1352416-78-4 | 22       | <chem>C[C@]1(c2cc(NC(=O)c3ccc(C#N)cn3)ccc2F)N=C(N)CO[C@H]1C(F)(F)F</chem>                 |
| 8     | BACE1/2-           | 26710        | 10       | <chem>C[C@@H]1C[C@H]1COC(C)(C)[C@@H]1C[C@</chem>                                          |



|    |                             |              |      |                                                                                      |
|----|-----------------------------|--------------|------|--------------------------------------------------------------------------------------|
|    | IN-1                        | 36-34-1      |      | H]1[C@]12CN(c3ncccn3)C[C@H]1CSC(N)=N2                                                |
| 9  | Umibecestat                 | 1387560-01-1 | 11   | C[C@@]1(c2nc(NC(=O)c3ncc(C(F)(F)F)cc3Cl)cc2F)CO[C@@](C)(C(F)(F)F)C(N)=N1             |
| 10 | LY2886721                   | 1262036-50-9 | 20.3 | NC1=N[C@@]2(c3cc(NC(=O)c4ccc(F)cn4)ccc3F)COC[C@H]2CS1                                |
| 11 | beta-Secretase Inhibitor IV | 797035-11-1  | 15.6 | C[C@@H](NC(=O)c1cc(C(=O)N[C@@H](Cc2ccc2)[C@H](O)CNC2CC2)cc(N(C)S(C)(=O)=O)c1)c1cccc1 |
| 12 | AMG-8718                    | 1215868-94-2 | 0.7  | CC1(C#Cc2cnc3c(c2)[C@]2(COC(N)=N2)c2cc(-c4cccnc4F)ccc2O3)COC1                        |
| 13 | PF-06751979                 | 1818339-66-0 | 7.3  | C[C@H]1C[C@H]2CSC(N)=N[C@@]2(c2nc(NC(=O)c3ccc(OC(F)F)cn3)cs2)CO1                     |
| 14 | JNJ-67569762                | 2380313-26-6 | 2.7  | CCS(=O)(=O)[C@]1(C)CC[C@@](CF)(c2cc(NC(=O)c3cc4c(cn3)OC(F)(F)O4)ccc2F)N=C1N          |
| 15 | NB-360                      | 1262857-73-7 | 5    | Cc1cc(C#N)cnc1C(=O)Nc1ccc(F)c([C@]2(C)CO[C@@](C)(C(F)(F)F)C(N)=N2)c1                 |
| 16 | AM-6494                     | 1874232-80-0 | 0.4  | C#CCOc1cnc(C(=O)Nc2cc(F)c(F)c([C@@]3(C)N=C(N)S[C@@]4(COC)C[C@H]43)c2)cn1             |

**Supplementary Table 12:** The anti-COX-1 drugs with an IC50 threshold of 100 from MedChemExpress website. The cas is the unique identifier for a drug. (.xlsx)

| index | name                        | cas        | IC50 (nM) | canonical smiles                                                           |
|-------|-----------------------------|------------|-----------|----------------------------------------------------------------------------|
| 1     | Indomethacin                | 53-86-1    | 18        | COc1ccc2c(c1)c(CC(=O)O)c(C)n2C(=O)c1ccc(Cl)cc1                             |
| 2     | Indomethacin sodium         | 7681-54-1  | 18        | COc1ccc2c(c1)c(CC(=O)[O-])c(C)n2C(=O)c1ccc(Cl)cc1.[Na+]                    |
| 3     | Indomethacin sodium hydrate | 74252-25-8 | 18        | COc1ccc2c(c1)c(CC(=O)OC/C=C(\C)CC/C=C(\C)CCC=C(C)C)c(C)n2C(=O)c1ccc(Cl)cc1 |
| 4     | Diclofenac                  | 15307-86-5 | 4         | O=C(O)Cc1cccc1Nc1c(Cl)cccc1Cl                                              |
| 5     | Diclofenac potassium        | 15307-81-0 | 4         | O=C([O-])Cc1cccc1Nc1c(Cl)cccc1Cl.[K+]                                      |
| 6     | Diclofenac diethylamine     | 78213-16-8 | 4         | CCNCC.O=C(O)Cc1cccc1Nc1c(Cl)cccc1Cl                                        |
| 7     | Diclofenac Sodium           | 15307-79-6 | 4         | O=C([O-])Cc1cccc1Nc1c(Cl)cccc1Cl.[Na+]                                     |
| 8     | Mofezolac                   | 78967      | 1.44      | COc1ccc(-c2noc(CC(=O)O)c2-                                                 |

|    |                                      |                 |      |                                                            |
|----|--------------------------------------|-----------------|------|------------------------------------------------------------|
|    |                                      | -07-4           |      | c2ccc(OC)cc2)cc1                                           |
| 9  | Tenidap                              | 12021<br>0-48-2 | 30   | NC(=O)N1C(=O)/C(=C(\O)c2cccs2)c2cc(Cl)c<br>cc21            |
| 10 | Tenidap-d3                           | 14274<br>1-60-4 | 30   | NC(=O)N1C(=O)C(C(=O)c2cccs2)c2cc(Cl)cc<br>c21              |
| 11 | SC-560                               | 18881<br>7-13-2 | 9    | COc1ccc(-n2nc(C(F)(F)F)cc2-<br>c2ccc(Cl)cc2)cc1            |
| 12 | Lornoxicam                           | 70374<br>-39-9  | 5    | CN1C(C(=O)Nc2cccn2)=C(O)c2sc(Cl)cc2S1<br>(=O)=O            |
| 13 | S-(+)-<br>Ketoprofen                 | 22161<br>-81-5  | 1.9  | C[C@H](C(=O)O)c1ccc(C(=O)c2ccccc2)c1                       |
| 14 | FR122047                             | 13071<br>7-51-0 | 28   | COc1ccc(-c2nc(C(=O)N3CCN(C)CC3)sc2-<br>c2ccc(OC)cc2)cc1.Cl |
| 15 | Ketorolac<br>tromethamine<br>salt    | 74103<br>-07-4  | 20   | NC(CO)(CO)CO.O=C(c1ccccc1)c1ccc2n1CC<br>C2C(=O)O           |
| 16 | Eltenac                              | 72895<br>-88-6  | 30   | O=C(O)Cc1csc1Nc1c(Cl)ccc1Cl                                |
| 17 | Bromfenac                            | 91714<br>-94-2  | 5.56 | Nc1c(CC(=O)O)ccc1C(=O)c1ccc(Br)cc1                         |
| 18 | Bromfenac<br>sodium                  | 91714<br>-93-1  | 5.56 | Nc1c(CC(=O)[O-<br>])ccc1C(=O)c1ccc(Br)cc1.[Na+]            |
| 19 | Ketoprofen                           | 22071<br>-15-4  | 2    | CC(C(=O)O)c1ccc(C(=O)c2ccccc2)c1                           |
| 20 | Ketoprofen<br>(RP-19583)<br>lysinate | 57469<br>-78-0  | 2    | CC(C(=O)O)c1ccc(C(=O)c2ccccc2)c1.NCC<br>CC[C@H](N)C(=O)O   |
| 21 | Ketorolac                            | 74103<br>-06-3  | 20   | O=C(c1ccccc1)c1ccc2n1CCC2C(=O)O                            |
| 22 | Ketorolac<br>hemicalcium             | 16710<br>5-81-9 | 20   | O=C(c1ccccc1)c1ccc2n1CCC2C(=O)O.[CaH<br>2]                 |

**Supplementary Table 13:** The anti-COX-2 drugs with an IC<sub>50</sub> threshold of 100 from MedChemExpress website. The cas is the unique identifier for a drug. (.xlsx)

| in<br>de<br>x | name        | cas                  | IC <sub>50</sub><br>(n<br>M) | canonical smiles                                                          |
|---------------|-------------|----------------------|------------------------------|---------------------------------------------------------------------------|
| 1             | COX-2-IN-28 | 24135<br>65-18-<br>9 | 54                           | CSc1nc2ccccc2n1-<br>c1csc(NCC(C)=NN=c2scc(-<br>c3ccc(C)cc3)n2-c2ccccc2)n1 |
| 2             | COX-2-IN-26 | 24135<br>65-19-<br>0 | 67                           | CSc1nc2ccccc2n1-<br>c1csc(NCC(C)=NN=C2SCC(=O)N2c2ccc<br>cc2)n1            |
| 3             | COX-2-IN-20 | 25294<br>51-43-<br>0 | 17.<br>9                     | COC(=O)c1nc(CCl)n(-c2ccc(F)cc2)n1                                         |
| 4             | COX-2-IN-21 | 25196                | 39                           | COc1cc(C2CC(c3ccccc(-                                                     |

|    |                                             |                  |      |                                                                            |
|----|---------------------------------------------|------------------|------|----------------------------------------------------------------------------|
|    |                                             | 31-11-7          |      | n4cn4)c3)=NN2C(C)=O)cc(OC)c1OC                                             |
| 5  | COX-2/15-LOX-IN-1                           | 24135<br>65-15-6 | 75   | CSc1nc2cccc2n1-c1csc(NCC(C)=NNC(=S)Nc2cccc2)n1                             |
| 6  | COX-2-IN-17                                 | 24113<br>90-10-6 | 20   | COC(=O)[C@@H](N)Cc1cn(-c2nc(Cl)nc(N3CCCC3)n2)c2cccc12                      |
| 7  | COX-2/5-LOX-IN-2                            | 24103<br>84-59-5 | 10   | NS(=O)(=O)c1ccc(-n2nc(C(=O)O)cc2-c2cc3cccc3s2)cc1                          |
| 8  | Diclofenac                                  | 15307<br>-86-5   | 1.3  | O=C(O)Cc1cccc1Nc1c(Cl)cccc1Cl                                              |
| 9  | Diclofenac potassium                        | 15307<br>-81-0   | 1.3  | O=C([O-])Cc1cccc1Nc1c(Cl)cccc1Cl.[K+]                                      |
| 10 | Diclofenac diethylamine                     | 78213<br>-16-8   | 1.3  | CCNCC.O=C(O)Cc1cccc1Nc1c(Cl)cccc1Cl                                        |
| 11 | Diclofenac Sodium                           | 15307<br>-79-6   | 1.3  | O=C([O-])Cc1cccc1Nc1c(Cl)cccc1Cl.[Na+]                                     |
| 12 | Rofecoxib                                   | 16201<br>1-90-7  | 26   | CS(=O)(=O)c1ccc(C2=C(c3cccc3)C(=O)OC2)cc1                                  |
| 13 | Valdecoxib                                  | 18169<br>5-72-7  | 5    | Cc1onc(-c2cccc2)c1-c1ccc(S(N)(=O)=O)cc1                                    |
| 14 | Indomethacin (Indometacin) sodium           | 7681-54-1        | 26   | COc1ccc2c(c1)c(CC(=O)[O-])c(C)n2C(=O)c1ccc(Cl)cc1.[Na+]                    |
| 15 | Indomethacin                                | 53-86-1          | 26   | COc1ccc2c(c1)c(CC(=O)O)c(C)n2C(=O)c1ccc(Cl)cc1                             |
| 16 | Anti-inflammatory agent 8                   | 11039<br>20-19-9 | 0.09 | Cc1c(C(=O)NNC(=S)Nc2cccc2)sc2nc3cccc3n12                                   |
| 17 | Indomethacin (Indometacin) sodium hydrateis | 74252<br>-25-8   | 26   | COc1ccc2c(c1)c(CC(=O)OC/C=C(\C)CC/C=C(\C)CCC=C(C)C)c(C)n2C(=O)c1ccc(Cl)cc1 |
| 18 | SC-58125                                    | 16205<br>4-19-5  | 40   | CS(=O)(=O)c1ccc(-n2nc(C(F)(F)F)cc2-c2ccc(F)cc2)cc1                         |
| 19 | S-2474                                      | 15808<br>9-95-3  | 11   | CCN1CC/C(=C\c2cc(C(C)(C)C)c(O)c(C)(C)(C)c2)S1(=O)=O                        |
| 20 | FR-188582                                   | 18969<br>9-82-9  | 17   | CS(=O)(=O)c1ccc(-c2cc(Cl)nn2-c2cccc2)cc1                                   |
| 21 | DuP-697                                     | 88149<br>-94-4   | 10   | CS(=O)(=O)c1ccc(-c2cc(Br)sc2-c2ccc(F)cc2)cc1                               |
| 22 | Celecoxib                                   | 16959<br>0-42-5  | 40   | Cc1ccc(-c2cc(C(F)(F)F)nn2-c2ccc(S(N)(=O)=O)cc2)cc1                         |
| 23 | Indomethacin farnesil                       | 85801<br>-02-1   | 26   | COc1ccc2c(c1)c(CC(=O)OCC=C(C)CCC=C(C)CCC=C(C)C)c(C)n2C(=O)c1ccc(Cl)cc1     |
| 24 | Lornoxicam                                  | 70374<br>-39-9   | 8    | CN1C(C(=O)Nc2cccn2)=C(O)c2sc(Cl)c2S1(=O)=O                                 |
| 25 | Tilmaxcoxib                                 | 18020<br>0-68-4  | 85   | Cc1nc(C2CCCC2)c(-c2ccc(S(N)(=O)=O)c(F)c2)o1                                |
| 26 | S-(+)-Ketoprofen                            | 22161<br>-81-5   | 27   | C[C@H](C(=O)O)c1ccc(C(=O)c2cccc2)c1                                        |

|    |                     |                 |          |                                                                    |
|----|---------------------|-----------------|----------|--------------------------------------------------------------------|
| 27 | SC57666             | 15895<br>9-32-1 | 26       | <chem>CS(=O)(=O)c1ccc(C2=C(c3ccc(F)cc3)C<br/>CC2)cc1</chem>        |
| 28 | Eltenac             | 72895<br>-88-6  | 30       | <chem>O=C(O)Cc1csc1Nc1c(Cl)cccc1Cl</chem>                          |
| 29 | Bromfenac           | 91714<br>-94-2  | 7.4<br>5 | <chem>Nc1c(CC(=O)O)cccc1C(=O)c1ccc(Br)cc1</chem>                   |
| 30 | Bromfenac sodium    | 91714<br>-93-1  | 7.4<br>5 | <chem>Nc1c(CC(=O)[O-]<br/>]cccc1C(=O)c1ccc(Br)cc1.[Na+]</chem>     |
| 31 | Desmethyl Celecoxib | 17056<br>9-87-6 | 32       | <chem>NS(=O)(=O)c1ccc(-n2nc(C(F)(F)F)cc2-<br/>c2cccc2)cc1</chem>   |
| 32 | Imrecoxib           | 39568<br>3-14-4 | 18       | <chem>CCCN1CC(c2ccc(S(C)(=O)=O)cc2)=C(c<br/>2ccc(C)cc2)C1=O</chem> |
| 33 | Fenofibric acid     | 42017<br>-89-0  | 48       | <chem>CC(C)(Oc1ccc(C(=O)c2ccc(Cl)cc2)cc1)C<br/>(=O)O</chem>        |
| 34 | Thioflosulide       | 15820<br>5-05-1 | 2.3      | <chem>CS(=O)(=O)Nc1cc2c(cc1Sc1ccc(F)cc1F)<br/>C(=O)CC2</chem>      |
| 35 | Ketoprofen          | 22071<br>-15-4  | 26       | <chem>CC(C(=O)O)c1cccc(C(=O)c2cccc2)c1</chem>                      |

**Supplementary Table 14:** The anti-EP4 drugs with an IC50 threshold of 30 from MedChemExpress website. The cas is the unique identifier for a drug.

(.xlsx)

| in<br>de<br>x | name                      | cas              | IC50<br>(nM) | canonical smiles                                                                       |
|---------------|---------------------------|------------------|--------------|----------------------------------------------------------------------------------------|
| 1             | EP4 receptor antagonist 1 | 228725<br>9-07-6 | 6.1          | <chem>C/C=C/c1nnn(Cc2ccc(C(F)(F)F)cc2)c1C(=O)N<br/>[C@@H](C)c1ccc(C(=O)O)cc1</chem>    |
| 2             | EP4 receptor antagonist 2 | 196531<br>6-82-8 | 7.8          | <chem>CC(C)NC(=O)c1ccc2c(c1)[C@]1(CCO2)C[C<br/>@H]1C(=O)Nc1cc(C#N)ccc1CCCC(=O)O</chem> |
| 3             | BAY-1316957               | 161326<br>4-40-6 | 15.3         | <chem>CCn1c2ccc(C)cc2c2cc(-<br/>c3nc4c(C)c(C(=O)O)ccc4n3CCOC)ccc21</chem>              |
| 4             | TP-16                     | 233297<br>2-26-4 | 2.1          | <chem>C[C@H](NC(=O)c1c(Cc2ccc(F)cc2)sc2c1CC<br/>OC2)c1ccc(C(=O)O)cc1</chem>            |
| 5             | Palupiprant               | 136948<br>9-71-3 | 13.5         | <chem>C[C@H](NC(=O)c1c(C(F)F)nn(C)c1Oc1cccc(<br/>C(F)(F)F)c1)c1ccc(C(=O)O)cc1</chem>   |
| 6             | CJ-42794                  | 847728<br>-01-2  | 10           | <chem>C[C@H](NC(=O)c1cc(Cl)ccc1Oc1ccc(F)cc1)c<br/>1ccc(C(=O)O)cc1</chem>               |
| 7             | MK-2894                   | 100603<br>6-87-8 | 2.5          | <chem>Cc1sc(C)c(C(=O)NC2(c3ccc(C(=O)O)cc3)CC<br/>2)c1Cc1ccc(C(F)(F)F)cc1</chem>        |
| 8             | MK-2894 sodium salt       | 100603<br>6-88-9 | 2.5          | <chem>Cc1sc(C)c(C(=O)NC2(c3ccc(C(=O)O)cc3)CC<br/>2)c1Cc1ccc(C(F)(F)F)cc1.[NaH]</chem>  |

**Supplementary Table 15:** The virtual screening on external BACE1 valiation set using ImageMol and VideoMol. imagemol\_probs and videomol\_probs

represent the predicted probabilities of anti-BACE1 given by ImageMol and VideoMol, respectively. (.xlsx)

| index | Drug Name                   | imagemol_probs | videomol_probs |
|-------|-----------------------------|----------------|----------------|
| 1     | BACE-1 inhibitor 2          | 0.8419358      | 0.9690067      |
| 2     | BACE-1 inhibitor 1          | 0.7290269      | 0.9868666      |
| 3     | BACE1-IN-13                 | 0.93444705     | 0.9687921      |
| 4     | BACE1-IN-1                  | 0.7387245      | 0.9473744      |
| 5     | BACE1-IN-6                  | 0.9090035      | 0.9966139      |
| 6     | BACE1-IN-4                  | 0.581801       | 0.9993352      |
| 7     | BACE1-IN-2                  | 0.5748341      | 0.99737775     |
| 8     | BACE1/2-IN-1                | 0.41264746     | 0.9997812      |
| 9     | Umibecestat                 | 0.7080996      | 0.9896259      |
| 10    | LY2886721                   | 0.80451745     | 0.92877966     |
| 11    | beta-Secretase Inhibitor IV | 0.036601424    | 0.16687886     |
| 12    | AMG-8718                    | 0.9256922      | 0.99652356     |
| 13    | PF-06751979                 | 0.31388915     | 0.57966435     |
| 14    | JNJ-67569762                | 0.8896324      | 0.9999232      |
| 15    | NB-360                      | 0.87558085     | 0.9982304      |
| 16    | AM-6494                     | 0.9452854      | 0.99410605     |

**Supplementary Table 16:** The virtual screening on external COX-1 validation set using ImageMol and VideoMol. imagemol\_probs and videomol\_probs represent the predicted probabilities of anti-COX-1 given by ImageMol and VideoMol, respectively. (.xlsx)

| index | Drug Name                   | imagemol_probs | videomol_probs |
|-------|-----------------------------|----------------|----------------|
| 1     | Indomethacin                | 0.01401831     | 5.10E-06       |
| 2     | Indomethacin sodium         | 0.013258358    | 7.33E-06       |
| 3     | Indomethacin sodium hydrate | 0.016143031    | 0.000184664    |
| 4     | Diclofenac                  | 0.01718534     | 0.9793444      |
| 5     | Diclofenac potassium        | 0.03288859     | 0.001633527    |
| 6     | Diclofenac diethylamine     | 0.04155041     | 0.862361       |
| 7     | Diclofenac Sodium           | 0.02927339     | 0.001424704    |
| 8     | Mofezolac                   | 0.33693957     | 0.2581888      |
| 9     | Tenidap                     | 0.13598277     | 0.008560411    |
| 10    | Tenidap-d3                  | 0.109688826    | 0.00995435     |
| 11    | SC-560                      | 0.4061602      | 0.9985505      |
| 12    | Lornoxicam                  | 0.06643499     | 0.000148638    |
| 13    | S-(+)-Ketoprofen            | 0.16169016     | 0.9383299      |
| 14    | FR122047                    | 0.030881904    | 0.59208053     |

|    |                                |             |             |
|----|--------------------------------|-------------|-------------|
| 15 | Ketorolac tromethamine salt    | 0.015761768 | 0.18289186  |
| 16 | Eltenac                        | 0.016934287 | 0.021998327 |
| 17 | Bromfenac                      | 0.039675813 | 0.9789971   |
| 18 | Bromfenac sodium               | 0.057841644 | 0.48522508  |
| 19 | Ketoprofen                     | 0.16769184  | 0.15350829  |
| 20 | Ketoprofen (RP-19583) lysinate | 0.091650955 | 0.07088906  |
| 21 | Ketorolac                      | 0.12183086  | 0.9987212   |
| 22 | Ketorolac hemicalcium          | 0.11995495  | 0.9982821   |

**Supplementary Table 17:** The virtual screening on external COX-2 validation set using ImageMol and VideoMol. `imagemol_probs` and `videomol_probs` represent the predicted probabilities of anti-COX-2 given by ImageMol and VideoMol, respectively. (.xlsx)

| index | Drug Name                                   | imagemol_probs | videomol_probs |
|-------|---------------------------------------------|----------------|----------------|
| 1     | COX-2-IN-28                                 | 0.71353495     | 0.99945635     |
| 2     | COX-2-IN-26                                 | 0.2967862      | 0.52510965     |
| 3     | COX-2-IN-20                                 | 0.000742534    | 0.000186789    |
| 4     | COX-2-IN-21                                 | 0.008292489    | 1.03E-06       |
| 5     | COX-2/15-LOX-IN-1                           | 0.66978335     | 0.5747041      |
| 6     | COX-2-IN-17                                 | 0.20885414     | 0.9999974      |
| 7     | COX-2/5-LOX-IN-2                            | 0.24981825     | 0.81430477     |
| 8     | Diclofenac                                  | 0.13238531     | 0.057505697    |
| 9     | Diclofenac potassium                        | 0.20137852     | 0.53897834     |
| 10    | Diclofenac diethylamine                     | 0.016165184    | 0.48384362     |
| 11    | Diclofenac Sodium                           | 0.14288409     | 0.508286       |
| 12    | Rofecoxib                                   | 0.005311308    | 0.45926        |
| 13    | Valdecoxib                                  | 0.2744622      | 0.000237122    |
| 14    | Indomethacin (Indometacin) sodium           | 0.09831848     | 1.81E-05       |
| 15    | Indomethacin                                | 0.1264606      | 2.15E-07       |
| 16    | Anti-inflammatory agent 8                   | 0.016152615    | 1.40E-05       |
| 17    | Indomethacin (Indometacin) sodium hydrateis | 0.31498575     | 0.00723425     |
| 18    | SC-58125                                    | 0.10150733     | 0.000491314    |
| 19    | S-2474                                      | 0.001583099    | 8.77E-07       |
| 20    | FR-188582                                   | 0.22198991     | 0.008781442    |
| 21    | DuP-697                                     | 0.20812099     | 0.0001205      |
| 22    | Celecoxib                                   | 0.14900573     | 0.000566671    |
| 23    | Indomethacin farnesil                       | 0.29184505     | 0.00585067     |
| 24    | Lornoxicam                                  | 0.08456622     | 8.87E-07       |
| 25    | Tilmaxcoxib                                 | 0.49571124     | 0.4181791      |
| 26    | S-(+)-Ketoprofen                            | 0.002051125    | 2.42E-06       |

|    |                     |             |             |
|----|---------------------|-------------|-------------|
| 27 | SC57666             | 0.087090984 | 0.99999297  |
| 28 | Eltenac             | 0.016617168 | 0.010179955 |
| 29 | Bromfenac           | 0.037134465 | 0.99999905  |
| 30 | Bromfenac sodium    | 0.030660748 | 0.14692196  |
| 31 | Desmethyl Celecoxib | 0.2064141   | 0.88198847  |
| 32 | Imrecoxib           | 0.14230609  | 0.9998147   |
| 33 | Fenofibric acid     | 0.00863223  | 0.000214783 |
| 34 | Thioflosulide       | 0.2516166   | 0.9999695   |
| 35 | Ketoprofen          | 0.001724457 | 1.78E-06    |

**Supplementary Table 18:** The virtual screening on external EP4 validation set using ImageMol and VideoMol. `imagemol_probs` and `videomol_probs` represent the predicted probabilities of anti-EP4 given by ImageMol and VideoMol, respectively. (.xlsx)

| index | Drug Name                 | imagemol_probs | videomol_probs |
|-------|---------------------------|----------------|----------------|
| 1     | EP4 receptor antagonist 1 | 0.09598055     | 0.9960939      |
| 2     | EP4 receptor antagonist 2 | 0.14752103     | 0.000257138    |
| 3     | BAY-1316957               | 0.14312284     | 0.9475602      |
| 4     | TP-16                     | 0.44609693     | 0.78389543     |
| 5     | Palupiprant               | 0.06736643     | 0.007245741    |
| 6     | CJ-42794                  | 0.09034469     | 0.85260254     |
| 7     | MK-2894                   | 0.35040438     | 0.5237833      |
| 8     | MK-2894 sodium salt       | 0.39034134     | 0.99885285     |

**Supplementary Table 19:** The 2,500 FDA-approved drugs from DrugBank database. We only show partial information of the first 10 items. For full information, please see the `xlsx` file. (.xlsx)

| index | DrugBank ID | Name                |
|-------|-------------|---------------------|
| 1     | DB15444     | Elexacaftor         |
| 2     | DB08949     | Inositol nicotinate |
| 3     | DB14568     | Ivosidenib          |
| 4     | DB11700     | Setmelanotide       |
| 5     | DB13879     | Glecaprevir         |
| 6     | DB13867     | Fluticasone         |
| 7     | DB11363     | Alectinib           |

|    |         |               |
|----|---------|---------------|
| 8  | DB11574 | Elbasvir      |
| 9  | DB11653 | Bremelanotide |
| 10 | DB15982 | Berotrastat   |

**Supplementary Table 20:** Virtual screening on 2,500 FDA-approved drugs.

The probs represents the probability that the drug is a BACE1 inhibitor, which are predicted by ImageMol. Grid Score calculated by Dock6.10<sup>13</sup> represents the binding force between ligand and receptor. The lower the value, the stronger the binding force. The evidence represents research related to the treatment of Alzheimer's disease. We only show the first 20 items. For full information, please see the xlsx file. (.xlsx)

| DrugBank ID | Name                | probs      | Grid Score | Related? | evidence description                                                                                                                                                                                                                                                        | evidence link                                                                                                             |
|-------------|---------------------|------------|------------|----------|-----------------------------------------------------------------------------------------------------------------------------------------------------------------------------------------------------------------------------------------------------------------------------|---------------------------------------------------------------------------------------------------------------------------|
| DB00582     | Voriconazole        | 0.8937607  | -31.719074 | No       |                                                                                                                                                                                                                                                                             |                                                                                                                           |
| DB13345     | Dihydroergocristine | 0.81123424 | -44.298321 | Yes      | The FDA-approved natural product dihydroergocristine reduces the production of the Alzheimer's disease amyloid- $\beta$ peptides                                                                                                                                            | <a href="https://pubmed.ncbi.nlm.nih.gov/26567970/">https://pubmed.ncbi.nlm.nih.gov/26567970/</a>                         |
| DB13878     | Pibrentasvir        | 0.80861706 | -70.160301 | Yes      | A recent study reported that treatment of HCV infection with direct-acting antivirals (e.g., glecaprevir/pibrentasvir, elbasvir/grazoprevir, and ledipasvir/sofosbuvir) significantly reduces mortality risk in patients with Alzheimer's disease (AD) and related dementia | <a href="https://www.ncbi.nlm.nih.gov/pmc/articles/PMC8959984/">https://www.ncbi.nlm.nih.gov/pmc/articles/PMC8959984/</a> |
| DB06708     | Lumefantrine        | 0.76963395 | -44.58     | No       |                                                                                                                                                                                                                                                                             |                                                                                                                           |



|         |                            |            | 0559        |     |                                                                                                                                                                                                              |                                                                                                                                 |
|---------|----------------------------|------------|-------------|-----|--------------------------------------------------------------------------------------------------------------------------------------------------------------------------------------------------------------|---------------------------------------------------------------------------------------------------------------------------------|
| DB11273 | Dihydroergocornine         | 0.76337    | -42.261795  | Yes | Dihydroergocornine (as the component of Ergoloid mesylates) has been used to treat dementia and age-related cognitive impairment (such as in Alzheimer disease), as well as to aid in recovery after stroke. | <a href="https://drug.s.ncats.io/drug/IK4C1OC8NE">https://drug.s.ncats.io/drug/IK4C1OC8NE</a>                                   |
| DB11274 | Dihydro-alpha-ergocryptine | 0.76058465 | -44.593708  | No  |                                                                                                                                                                                                              |                                                                                                                                 |
| DB08815 | Lurasidone                 | 0.72137386 | -41.349476  | No  |                                                                                                                                                                                                              |                                                                                                                                 |
| DB00320 | Dihydroergotamine          | 0.71469796 | -41.734951  | No  |                                                                                                                                                                                                              |                                                                                                                                 |
| DB11828 | Neratinib                  | 0.71019876 | -49.609707  | Yes | Our data support further evaluation of AR12 and neratinib in neuronal cells as repurposed treatments for AD.                                                                                                 | <a href="https://www.ncbi.nlm.nih.gov/pmc/articles/PMC8312464/">https://www.ncbi.nlm.nih.gov/pmc/articles/PMC8312464/</a>       |
| DB05812 | Abiraterone                | 0.69422716 | -30.7535    | No  |                                                                                                                                                                                                              |                                                                                                                                 |
| DB11700 | Setmelanotide              | 0.6869522  | -61.032345  | No  |                                                                                                                                                                                                              |                                                                                                                                 |
| DB11104 | Sulfur hexafluoride        | 0.68663824 | -11.747492  | No  |                                                                                                                                                                                                              |                                                                                                                                 |
| DB11633 | Isavuconazole              | 0.67825085 | -38.032864  | No  |                                                                                                                                                                                                              |                                                                                                                                 |
| DB09099 | Somatostatin               | 0.66924506 | nan         | -   |                                                                                                                                                                                                              |                                                                                                                                 |
| DB15982 | Bertralstat                | 0.6565085  | -46.143105  | No  |                                                                                                                                                                                                              |                                                                                                                                 |
| DB00106 | Abarelix                   | 0.65392923 | -101.951157 | No  |                                                                                                                                                                                                              |                                                                                                                                 |
| DB00007 | Leuprolide                 | 0.65373343 | -90.477882  | Yes | The LUCINDA trial: Leuprolide + cholinesterase inhibition to reduce neurologic decline in                                                                                                                    | <a href="https://alz-journals.onlinelibrary.wiley.com/doi/abs/10.">https://alz-journals.onlinelibrary.wiley.com/doi/abs/10.</a> |

|         |               |                |                    |    |             |                     |
|---------|---------------|----------------|--------------------|----|-------------|---------------------|
|         |               |                |                    |    | Alzheimer's | 1002/alz.0<br>38780 |
| DB11275 | Epicriptine   | 0.647<br>91554 | -<br>43.82<br>4257 | No |             |                     |
| DB06791 | Lanreotide    | 0.639<br>42754 | -<br>62.84<br>6352 | No |             |                     |
| DB00921 | Buprenorphine | 0.638<br>1763  | -<br>35.94<br>207  | No |             |                     |

**Supplementary Table 21:** Virtual screening on 2,500 FDA-approved drugs.

The probs represents the probability that the drug is a BACE1 inhibitor, which are predicted by VideoMol. Grid Score calculated by Dock6.10 represents the binding force between ligand and receptor. The lower the value, the stronger the binding force. The evidence represents research related to the treatment of Alzheimer's disease. We only show the first 20 items. For full information, please see the xlsx file. (.xlsx)

| DrugBank ID | Name                | probs          | Grid Score         | Related? | evidence description                                                                                                                    | evidence link                                                                                                                       |
|-------------|---------------------|----------------|--------------------|----------|-----------------------------------------------------------------------------------------------------------------------------------------|-------------------------------------------------------------------------------------------------------------------------------------|
| DB15444     | Elexacaftor         | 0.9930<br>2226 | -<br>46.73<br>3532 | No       |                                                                                                                                         |                                                                                                                                     |
| DB08949     | Inositol nicotinate | 0.9899<br>024  | -<br>55.27<br>6123 | Yes      | As a result, inositol nicotinate was predicted to act on at least one anti-AD drug target yet act against AD through various mechanisms | <a href="https://pesquisa.bvsalud.org/portal/resource/pt/wpr-780222">https://pesquisa.bvsalud.org/portal/resource/pt/wpr-780222</a> |
| DB14568     | Ivosidenib          | 0.9597<br>691  | -<br>42.92<br>4538 | No       |                                                                                                                                         |                                                                                                                                     |
| DB11700     | Setmelanotide       | 0.9592<br>6934 | -<br>61.03<br>2345 | No       |                                                                                                                                         |                                                                                                                                     |
| DB13879     | Glecaprevir         | 0.9591<br>8256 | -<br>45.78         | Yes      | glecaprevir/pibrentasvir,                                                                                                               | <a href="https://www.ncbi.">https://www.ncbi.</a>                                                                                   |

|         |                 |                |                    |     |                                                                                                                                                                                                            |                                                                     |
|---------|-----------------|----------------|--------------------|-----|------------------------------------------------------------------------------------------------------------------------------------------------------------------------------------------------------------|---------------------------------------------------------------------|
|         |                 |                | 6842               |     | elbasvir/grazoprevir, and ledipasvir/sofosbuvir) significantly reduces mortality risk in patients with Alzheimer's disease (AD) and related dementia                                                       | nlm.nih.gov/pmc/articles/PMC8959984/                                |
| DB13867 | Fluticasone     | 0.9476<br>4495 | -<br>35.31<br>1394 | Yes | The lower incidence of Alzheimer's dementia in the intranasal fluticasone propionate (Flonase) group compared to the Lipitor group was significant                                                         | https://www.ncbi.nlm.nih.gov/pmc/articles/PMC6110392/               |
| DB11363 | Alectinib       | 0.9432<br>152  | -<br>37.98<br>465  | Yes | downregulation of macroautophagy (autophagy) plays an essential role in AD pathogenesis. Therefore, targeting autophagy has drawn considerable attention as a therapeutic approach for the treatment of AD | https://www.sciencedirect.com/science/article/pii/S0163725822000651 |
| DB11574 | Elbasvir        | 0.9217<br>3696 | -<br>65.37<br>7815 | Yes | See Table S22                                                                                                                                                                                              |                                                                     |
| DB11653 | Bremelanotide   | 0.9208<br>2703 | -<br>63.47<br>7474 | No  |                                                                                                                                                                                                            |                                                                     |
| DB15982 | Berotrastat     | 0.9187<br>4415 | -<br>46.14<br>3105 | No  |                                                                                                                                                                                                            |                                                                     |
| DB06636 | Isavuconazonium | 0.9137<br>141  | -<br>68.28<br>4996 | No  |                                                                                                                                                                                                            |                                                                     |
| DB06663 | Pasireotide     | 0.9129<br>874  | -<br>63.45<br>9614 | No  |                                                                                                                                                                                                            |                                                                     |
| DB00115 | Cyanocobalamin  | 0.9082<br>298  | -<br>75.67<br>0044 | Yes | See Table S22                                                                                                                                                                                              |                                                                     |
| DB11828 | Neratinib       | 0.9022<br>543  | -<br>49.60<br>9707 | Yes | Neratinib as a Potential Therapeutic for                                                                                                                                                                   | https://www.emjreviews.co                                           |

|         |                           |            |            |     |                                                                                                                                                                                      |                                                                                                                          |
|---------|---------------------------|------------|------------|-----|--------------------------------------------------------------------------------------------------------------------------------------------------------------------------------------|--------------------------------------------------------------------------------------------------------------------------|
|         |                           |            |            |     | Mutant RAS and Osimertinib-Resistant Tumours                                                                                                                                         | m/flagship-journal/article/eratinib-as-a-potential-therapeutic-for-mutant-ras-and-osimertinib-resistant-tumours-j190322/ |
| DB11842 | Angiotensin II            | 0.88213295 | -84.811951 | Yes | See Table S22                                                                                                                                                                        |                                                                                                                          |
| DB12457 | Rimegepant                | 0.8742169  | -41.61306  | No  |                                                                                                                                                                                      |                                                                                                                          |
| DB00644 | Gonadorelin               | 0.86522996 | -93.958443 | Yes | See Table S22                                                                                                                                                                        |                                                                                                                          |
| DB15494 | Edotreotide gallium Ga-68 | 0.8631429  | -78.598076 | Yes | See Table S22                                                                                                                                                                        |                                                                                                                          |
| DB00520 | Caspofungin               | 0.8616219  | -56.143566 | Yes | In this study, we discovered that an antifungal drug, Caspofungin (CAS) is a potent A $\beta$ aggregation inhibitor that displays significantly reduced toxicity associated with AD. | <a href="https://pubmed.ncbi.nlm.nih.gov/33722677/">https://pubmed.ncbi.nlm.nih.gov/33722677/</a>                        |
| DB09065 | Cobicistat                | 0.8536151  | -67.501389 | No  |                                                                                                                                                                                      |                                                                                                                          |

**Supplementary Table 22:** Screening results of Top 6 approved drugs with the best grid score from DrugBank. DrugID corresponds to the drug id in DrugBank. Grid score represents binding ability between ligand and BACE1-4IVS receptor calculated by Dock6.10 and the smaller value denotes the

better score. The evidence represents research related to the treatment of Alzheimer's disease. (.xlsx)

| No. | DrugID  | Name                      | Grid Score | evidence description                                                                                                                                                                                                                                                                                                                                                       | evidence link                                                                                                                                                                   |
|-----|---------|---------------------------|------------|----------------------------------------------------------------------------------------------------------------------------------------------------------------------------------------------------------------------------------------------------------------------------------------------------------------------------------------------------------------------------|---------------------------------------------------------------------------------------------------------------------------------------------------------------------------------|
| 1   | DB00644 | Gonadorelin               | -93.958443 | Drugs used in intervention or treatment: Drug: GnRH, gonadorelin acetate                                                                                                                                                                                                                                                                                                   | <a href="https://clinicaltrials.gov/ct2/show/NCT04390646">https://clinicaltrials.gov/ct2/show/NCT04390646</a>                                                                   |
| 2   | DB11842 | Angiotensin II            | -84.811951 | Recently, emerging preclinical and clinical evidence has associated the brain renin angiotensin system (RAS) to AD pathology. Accumulating evidence has additionally identified antihypertensive medications targeting the RAS, particularly angiotensin receptor blockers (ARBs) and angiotensin-converting enzyme inhibitors (ACEIs), to delay AD onset and progression. | <a href="https://pubmed.ncbi.nlm.nih.gov/32700176/">https://pubmed.ncbi.nlm.nih.gov/32700176/</a>                                                                               |
| 3   | DB15494 | Edotreotide gallium Ga-68 | -78.598076 | Imaging tools of $\beta$ -amyloid ( $A\beta$ ) plaques are necessary for clinical and neuropsychological characteristics in AD. Gallium-68 is a promising radionuclide for in vivo imaging of $\beta$ -amyloid plaques because it is easily produced by a generator.                                                                                                       | <a href="https://openmedscience.com/gallium-68-radiotracer-for-alzheimers-plaque-imaging/">https://openmedscience.com/gallium-68-radiotracer-for-alzheimers-plaque-imaging/</a> |
| 4   | DB00115 | Cyanocobalamin            | -75.670044 | Here we demonstrate that BACE ( $\beta$ -secretase), as well as PS1, is regulated by methylation and that the reduction of folate and vitamin B12 in culture medium can cause a reduction of SAM levels with consequent increase in presenilin1 and BACE levels and with increase in $A\beta$ production.                                                                  | <a href="https://sciencedirect.com/science/article/abs/pii/S1044743104002209">https://sciencedirect.com/science/article/abs/pii/S1044743104002209</a>                           |
| 5   | DB06636 | Isavuconazonium           | -68.284996 | -                                                                                                                                                                                                                                                                                                                                                                          | -                                                                                                                                                                               |
| 6   | DB11574 | Elbasvir                  | -65.377815 | Several studies have reported that patients with chronic hepatitis C virus (HCV) infection tend to exhibit cognitive impairment and may increase the risk for dementia. A recent study reported that treatment of HCV infection with direct-acting antivirals (e.g., glecaprevir/pibrentasvir,                                                                             | <a href="https://www.ncbi.nlm.nih.gov/pmc/articles/PMC8959984/">https://www.ncbi.nlm.nih.gov/pmc/articles/PMC8959984/</a>                                                       |

|  |  |  |  |                                                                                                                                                       |  |
|--|--|--|--|-------------------------------------------------------------------------------------------------------------------------------------------------------|--|
|  |  |  |  | elbasvir/grazoprevir, and ledipasvir/sofosbuvir) significantly reduces mortality risk in patients with Alzheimer's disease (AD) and related dementia. |  |
|--|--|--|--|-------------------------------------------------------------------------------------------------------------------------------------------------------|--|

**Supplementary Table 23:** Evidence of key structures belonging to BACE-1

inhibitors. (.xlsx)

| No. | key structure    | evidence title                                                                                                                      | evidence description                                                                                                                                                                                                                                                                                               | evidence link                                                                                                                                                               |
|-----|------------------|-------------------------------------------------------------------------------------------------------------------------------------|--------------------------------------------------------------------------------------------------------------------------------------------------------------------------------------------------------------------------------------------------------------------------------------------------------------------|-----------------------------------------------------------------------------------------------------------------------------------------------------------------------------|
| 1   | Fluorine         | Development and Structural Modification of BACE1 Inhibitors                                                                         | In addition, the introduction of a fluorine atom in the side chain on the phenyl could improve BACE1 inhibitory activities.                                                                                                                                                                                        | <a href="https://www.mdpi.com/1420-3049/22/1/4">https://www.mdpi.com/1420-3049/22/1/4</a>                                                                                   |
| 2   | 1,2,4-Oxadiazole | Design and synthesis of potent $\beta$ -secretase (BACE1) inhibitors with P1' carboxylic acid bioisosteres                          | On the other hand, inhibitors 16–21, which contained one or two tetrazole rings, or acidic heterocycles (5-oxo-1,2,4-oxadiazole, 5-oxo-1,2,4-thiadiazole, and 2-thioxo-1,3,4-oxadiazole)18, 19 at P_1' position, respectively, showed significantly higher BACE1 inhibitory activities than their lead compound 1. | <a href="https://www.sciencedirect.com/science/article/pii/S0960894X06001636">https://www.sciencedirect.com/science/article/pii/S0960894X06001636</a>                       |
| 3   | Chromene         | BACE-1 inhibitory activities of new substituted phenyl-piperazine coupled to various heterocycles: Chromene, coumarin and quinoline | There is some latitude with regard to functional group identity (coumarin, chromene and quinoline) that allows further refinement of inhibitory potency relative to $\beta$ -secretase (BACE-1).                                                                                                                   | <a href="https://www.sciencedirect.com/science/article/pii/S0960894X05016331?via%3Dihub">https://www.sciencedirect.com/science/article/pii/S0960894X05016331?via%3Dihub</a> |
| 4   | Pyridine         | Aminoimidazoles as Potent and Selective Human $\beta$ -Secretase (BACE1) Inhibitors                                                 | The addition of either a pyridine or a pyrimidine group on the scaffold of 3 in a manner such that the group extends and occupies the S3 region of the BACE1 binding pocket, not previously accessed with 3, has                                                                                                   | <a href="https://pubs.acs.org/doi/full/10.1021/jm9006752">https://pubs.acs.org/doi/full/10.1021/jm9006752</a>                                                               |

|   |              |                                                                                                                                                                                                       |                                                                                                                                                                                                                                                                                                                                                                                                                             |                                                                                                                                                       |
|---|--------------|-------------------------------------------------------------------------------------------------------------------------------------------------------------------------------------------------------|-----------------------------------------------------------------------------------------------------------------------------------------------------------------------------------------------------------------------------------------------------------------------------------------------------------------------------------------------------------------------------------------------------------------------------|-------------------------------------------------------------------------------------------------------------------------------------------------------|
|   |              |                                                                                                                                                                                                       | significantly contributed to the ligand's potency.                                                                                                                                                                                                                                                                                                                                                                          |                                                                                                                                                       |
| 5 | Cyclopentane | Stereoselective Synthesis of Constrained Oxacyclic Hydroxyethylene Isosteres of Aspartic Protease Inhibitors: Aldol and Mukaiyama Aldol Methodologies for Branched Tetrahydrofuran 2-Carboxylic Acids | The carbocyclic analogue of 21c in which the tetrahydrofuran ring is replaced by a cyclopentane and a cyclopentanone are low nanomolar inhibitors of BACE1. The substantial loss of activity when a cyclopentane is replaced by an oxacyclic analogue might be the result of repulsive interactions of the ring oxygen atom with amide carbonyls in the active site, thus deviating from optimal conformations for binding. | <a href="https://pubs.acs.org/doi/full/10.1021/jo050749y">https://pubs.acs.org/doi/full/10.1021/jo050749y</a>                                         |
| 6 | Tetrazole    | Design and synthesis of potent $\beta$ -secretase (BACE1) inhibitors with P1' carboxylic acid bioisosteres                                                                                            | Among them, tetrazole ring-containing compounds, KMI-570 (IC <sub>50</sub> = 4.8 nM) and KMI-684 (IC <sub>50</sub> = 1.2 nM), exhibited significantly potent BACE1 inhibitory activities.                                                                                                                                                                                                                                   | <a href="https://www.sciencedirect.com/science/article/pii/S0960894X06001636">https://www.sciencedirect.com/science/article/pii/S0960894X06001636</a> |

**Supplementary Table 24:** Effect of pre-training strategy on 6 regression

datasets (GPCRs) with balanced scaffold split. w/o pretrain means no pre-

trained VideoMol. video-aware, direction-aware, and chemical-aware

represent pre-training VideoMol using only video-aware strategy, direction-

aware strategy, and chemical-aware strategy, respectively. & represents the

combination of multiple pre-training tasks. All means and standard deviations

are reported through three independent runs with random seeds of 0, 1, 2.

| strategy     | 5HT1A       |             | AA1R        |             | AA2AR       |             |
|--------------|-------------|-------------|-------------|-------------|-------------|-------------|
|              | RMSE        | MAE         | RMSE        | MAE         | RMSE        | MAE         |
| w/o pretrain | 0.993±0.001 | 0.804±0.002 | 0.919±0.006 | 0.755±0.008 | 1.073±0.01  | 0.882±0.013 |
| video-aware  | 0.772±0.011 | 0.604±0.009 | 0.709±0.007 | 0.783±0.010 | 0.847±0.002 | 0.651±0.002 |

|                    |                    |                    |                    |                    |                    |                    |
|--------------------|--------------------|--------------------|--------------------|--------------------|--------------------|--------------------|
| direction-aware    | 0.871±0.002        | 0.691±0.004        | 0.821±0.01         | 0.652±0.013        | 0.875±0.008        | 0.701±0.012        |
| chemical-aware     | 0.736±0.012        | 0.566±0.014        | <u>0.662±0.018</u> | <b>0.494±0.015</b> | <u>0.716±0.001</u> | 0.562±0.002        |
| chemical_direction | 0.718±0.002        | 0.559±0.004        | 0.706±0.005        | 0.516±0.008        | 0.724±0.008        | 0.568±0.003        |
| chemical_video     | <u>0.716±0.010</u> | <u>0.553±0.010</u> | 0.670±0.007        | 0.511±0.005        | 0.719±0.013        | <u>0.553±0.014</u> |
| direction_video    | 0.774±0.014        | 0.603±0.015        | 0.730±0.004        | 0.553±0.002        | 0.865±0.011        | 0.672±0.005        |
| VideoMol           | <b>0.708±0.017</b> | <b>0.547±0.015</b> | <b>0.655±0.007</b> | <u>0.496±0.006</u> | <b>0.712±0.011</b> | <b>0.543±0.005</b> |
|                    | <b>CNR2</b>        |                    | <b>DRD2</b>        |                    | <b>HRH3</b>        |                    |
| strategy           | <b>RMSE</b>        | <b>MAE</b>         | <b>RMSE</b>        | <b>MAE</b>         | <b>RMSE</b>        | <b>MAE</b>         |
| w/o pretrain       | 1.216±0.012        | 1.009±0.008        | 0.980±0.001        | 0.782±0.001        | 0.819±0.001        | 0.631±0.002        |
| video-aware        | 0.978±0.025        | 0.782±0.010        | 0.818±0.009        | 0.602±0.009        | 0.732±0.008        | 0.556±0.009        |
| direction-aware    | 1.024±0.01         | 0.842±0.008        | 0.903±0.010        | 0.700±0.009        | 0.759±0.005        | 0.575±0.007        |
| chemical-aware     | 0.890±0.004        | 0.698±0.002        | 0.759±0.003        | 0.565±0.003        | <u>0.669±0.010</u> | <u>0.512±0.010</u> |
| chemical_direction | 0.899±0.008        | 0.701±0.005        | 0.773±0.017        | 0.579±0.007        | 0.683±0.001        | 0.514±0.001        |
| chemical_video     | <u>0.874±0.012</u> | <u>0.686±0.013</u> | <u>0.745±0.012</u> | <b>0.555±0.013</b> | 0.686±0.003        | 0.526±0.004        |
| direction_video    | 0.997±0.025        | 0.789±0.021        | 0.832±0.005        | 0.615±0.007        | 0.734±0.006        | 0.559±0.002        |
| VideoMol           | <b>0.864±0.005</b> | <b>0.679±0.010</b> | <b>0.742±0.003</b> | <u>0.556±0.005</u> | <b>0.668±0.008</b> | <b>0.506±0.002</b> |

**Supplementary Table 25:** The performance of molecular fingerprint on 10 GPCR datasets with balanced scaffold split. EnsembleFP-MLP indicates the performance of integrating traditional molecular fingerprints in CAP and training an MLP. VideoMolFeat-MLP represents the performance of using VideoMol to extract molecular features and train an MLP. (.xlsx)

|                  |                    |                    |                    |                    |                    |                    |
|------------------|--------------------|--------------------|--------------------|--------------------|--------------------|--------------------|
|                  | 1. 5HT1A           |                    | 2. 5HT2A           |                    | 3. AA1R            |                    |
|                  | RMSE               | MAE                | RMSE               | MAE                | RMSE               | MAE                |
| EnsembleFP-MLP   | 1.030±0.000        | 0.837±0.001        | 1.207±0.005        | 0.975±0.006        | 0.915±0.005        | 0.734±0.005        |
| VideoMolFeat-MLP | <b>0.818±0.031</b> | <b>0.653±0.033</b> | <b>0.910±0.014</b> | <b>0.695±0.017</b> | <b>0.838±0.007</b> | <b>0.647±0.005</b> |
|                  | — continue —       |                    |                    |                    |                    |                    |
|                  | 4. AA2AR           |                    | 5. AA3R            |                    | 6. CNR2            |                    |
|                  | RMSE               | MAE                | RMSE               | MAE                | RMSE               | MAE                |
| EnsembleFP-MLP   | 1.076±0.003        | 0.871±0.002        | 0.991±0.001        | 0.791±0.002        | 1.228±0.004        | 1.027±0.002        |
| VideoMolFeat-MLP | <b>0.850±0.005</b> | <b>0.691±0.004</b> | <b>0.862±0.014</b> | <b>0.695±0.012</b> | <b>1.003±0.070</b> | <b>0.789±0.066</b> |
|                  | — continue —       |                    |                    |                    |                    |                    |
|                  | 7. DRD2            |                    | 8. DRD3            |                    | 9. HRH3            |                    |
|                  | RMSE               | MAE                | RMSE               | MAE                | RMSE               | MAE                |
| EnsembleFP-MLP   | 0.979±0.000        | 0.785±0.001        | 1.096±0.004        | 0.933±0.002        | 0.888±0.003        | 0.681±0.002        |
| VideoMolFeat-MLP | <b>0.885±0.003</b> | <b>0.660±0.002</b> | <b>0.837±0.012</b> | <b>0.663±0.011</b> | <b>0.741±0.001</b> | <b>0.578±0.002</b> |
|                  | — continue —       |                    |                    |                    |                    |                    |
|                  | 10. OPRM           |                    |                    |                    |                    |                    |
|                  | RMSE               | MAE                |                    |                    |                    |                    |
| EnsembleFP-MLP   | 1.023±0.006        | 0.815±0.002        |                    |                    |                    |                    |
| VideoMolFeat-MLP | <b>0.875±0.004</b> | <b>0.672±0.003</b> |                    |                    |                    |                    |



**Supplementary Table 26: Effect of frame number on VideoMol on 6**

regression datasets (GPCRs) with balanced scaffold split. #frame indicates the number of frames. All means and standard deviations are reported through three independent runs with random seeds of 0, 1, 2.

| #frame | 5HT1A              |                    | AA1R               |                    | AA2AR              |                    |
|--------|--------------------|--------------------|--------------------|--------------------|--------------------|--------------------|
|        | RMSE               | MAE                | RMSE               | MAE                | RMSE               | MAE                |
| 5      | 0.873±0.023        | 0.693±0.012        | 0.847±0.013        | 0.656±0.025        | 0.824±0.009        | 0.659±0.012        |
| 10     | 0.800±0.025        | 0.624±0.017        | 0.773±0.010        | 0.584±0.006        | 0.766±0.002        | 0.609±0.005        |
| 20     | 0.765±0.026        | 0.591±0.010        | 0.728±0.003        | 0.546±0.005        | 0.744±0.005        | 0.586±0.005        |
| 30     | 0.742±0.014        | 0.573±0.011        | 0.704±0.004        | 0.527±0.001        | 0.736±0.019        | 0.570±0.013        |
| 60     | <b>0.708±0.017</b> | <b>0.547±0.015</b> | <b>0.655±0.007</b> | <b>0.496±0.006</b> | <b>0.712±0.011</b> | <b>0.543±0.005</b> |

  

| #frame | CNR2               |                    | DRD2               |                    | HRH3               |                    |
|--------|--------------------|--------------------|--------------------|--------------------|--------------------|--------------------|
|        | RMSE               | MAE                | RMSE               | MAE                | RMSE               | MAE                |
| 5      | 0.991±0.032        | 0.811±0.027        | 0.875±0.016        | 0.660±0.012        | 0.733±0.017        | 0.567±0.009        |
| 10     | 0.950±0.032        | 0.762±0.039        | 0.822±0.014        | 0.620±0.003        | 0.696±0.013        | 0.540±0.014        |
| 20     | 0.910±0.016        | 0.721±0.011        | 0.792±0.001        | 0.600±0.004        | 0.679±0.019        | 0.521±0.014        |
| 30     | 0.890±0.013        | 0.700±0.009        | 0.769±0.005        | 0.580±0.003        | 0.686±0.019        | 0.531±0.015        |
| 60     | <b>0.864±0.005</b> | <b>0.679±0.010</b> | <b>0.742±0.003</b> | <b>0.556±0.005</b> | <b>0.668±0.008</b> | <b>0.506±0.002</b> |

**Supplementary Table 27: The performance of different video generation**

source on 10 GPCR datasets with balanced scaffold split. (.xlsx)

|              | 1. 5HT1A           |                    | 2. 5HT2A           |                    | 3. AA1R            |                    |
|--------------|--------------------|--------------------|--------------------|--------------------|--------------------|--------------------|
|              | RMSE               | MAE                | RMSE               | MAE                | RMSE               | MAE                |
| Openbabel    | 0.733±0.009        | 0.562±0.006        | 0.796±0.004        | 0.597±0.003        | 0.666±0.014        | 0.510±0.011        |
| DeepChem     | 0.718±0.006        | 0.557±0.009        | 0.790±0.016        | 0.595±0.019        | 0.677±0.014        | 0.504±0.010        |
| RDKit        | <b>0.708±0.017</b> | <b>0.547±0.015</b> | <b>0.775±0.017</b> | <b>0.578±0.009</b> | <b>0.655±0.007</b> | <b>0.496±0.006</b> |
| — continue — |                    |                    |                    |                    |                    |                    |
|              | 4. AA2AR           |                    | 5. AA3R            |                    | 6. CNR2            |                    |
|              | RMSE               | MAE                | RMSE               | MAE                | RMSE               | MAE                |
| Openbabel    | 0.705±0.004        | 0.548±0.008        | <b>0.779±0.015</b> | 0.618±0.009        | 0.903±0.018        | 0.714±0.012        |
| DeepChem     | <b>0.703±0.005</b> | 0.558±0.004        | 0.798±0.019        | 0.620±0.015        | 0.896±0.013        | 0.708±0.012        |
| RDKit        | 0.712±0.011        | <b>0.543±0.005</b> | 0.786±0.006        | <b>0.617±0.004</b> | <b>0.864±0.005</b> | <b>0.679±0.010</b> |
| — continue — |                    |                    |                    |                    |                    |                    |
|              | 7. DRD2            |                    | 8. DRD3            |                    | 9. HRH3            |                    |
|              | RMSE               | MAE                | RMSE               | MAE                | RMSE               | MAE                |
| Openbabel    | 0.763±0.018        | 0.562±0.009        | 0.745±0.005        | 0.580±0.003        | 0.679±0.004        | 0.524±0.004        |
| DeepChem     | 0.745±0.005        | <b>0.551±0.002</b> | 0.728±0.014        | 0.556±0.008        | <b>0.666±0.005</b> | <b>0.505±0.002</b> |
| RDKit        | <b>0.742±0.003</b> | 0.556±0.005        | <b>0.715±0.014</b> | <b>0.554±0.012</b> | 0.668±0.008        | 0.506±0.002        |

| — continue — |                    |                    |                    |                    |
|--------------|--------------------|--------------------|--------------------|--------------------|
|              | 10. OPRM           |                    | Mean               |                    |
|              | RMSE               | MAE                | RMSE               | MAE                |
| Openbabel    | <b>0.776±0.008</b> | 0.590±0.001        | 0.755±0.068        | 0.581±0.057        |
| DeepChem     | 0.825±0.008        | 0.607±0.009        | 0.755±0.072        | 0.576±0.060        |
| RDKit        | 0.795±0.015        | <b>0.579±0.011</b> | <b>0.742±0.064</b> | <b>0.565±0.053</b> |

**Supplementary Table 28:** The ability of VideoMol to distinguish different conformers. The percentile interval refers to sorting all RMSD values from small to large and selecting the value corresponding to the percentile interval.

(.xlsx)

| percentile interval in RMSD | 5HT1A | 5HT2A | AA1R  | AA2A R | AA3R  | CNR2  | DRD2  | DRD3  | HRH3  | OPRM  |
|-----------------------------|-------|-------|-------|--------|-------|-------|-------|-------|-------|-------|
| 0-10                        | 0.692 | 0.749 | 0.799 | 0.803  | 0.823 | 0.769 | 0.729 | 0.701 | 0.740 | 0.730 |
| 10-20                       | 0.724 | 0.726 | 0.786 | 0.784  | 0.771 | 0.747 | 0.733 | 0.740 | 0.721 | 0.740 |
| 20-30                       | 0.741 | 0.747 | 0.755 | 0.764  | 0.772 | 0.736 | 0.750 | 0.779 | 0.690 | 0.708 |
| 30-40                       | 0.726 | 0.733 | 0.749 | 0.747  | 0.752 | 0.735 | 0.748 | 0.795 | 0.703 | 0.716 |
| 40-50                       | 0.735 | 0.745 | 0.759 | 0.772  | 0.758 | 0.723 | 0.760 | 0.775 | 0.709 | 0.712 |
| 50-60                       | 0.703 | 0.744 | 0.765 | 0.761  | 0.760 | 0.710 | 0.743 | 0.785 | 0.706 | 0.725 |
| 60-70                       | 0.708 | 0.733 | 0.742 | 0.756  | 0.745 | 0.696 | 0.748 | 0.777 | 0.698 | 0.727 |
| 70-80                       | 0.663 | 0.748 | 0.753 | 0.743  | 0.766 | 0.712 | 0.715 | 0.775 | 0.700 | 0.716 |
| 80-90                       | 0.631 | 0.702 | 0.745 | 0.753  | 0.752 | 0.709 | 0.707 | 0.723 | 0.669 | 0.680 |
| 90-100                      | 0.518 | 0.625 | 0.654 | 0.702  | 0.733 | 0.680 | 0.615 | 0.631 | 0.585 | 0.658 |
| 0-100 (all data)            | 0.684 | 0.725 | 0.751 | 0.758  | 0.763 | 0.722 | 0.725 | 0.748 | 0.692 | 0.711 |

**Supplementary Table 29:** Details of the molecular fingerprints used in chemical-aware pretraining task.

| No. | Type of fingerprint | Name  | Dimension |
|-----|---------------------|-------|-----------|
| 1   | Circular-based      | ECFP0 | 1024      |
| 2   |                     | ECFP2 | 1024      |
| 3   |                     | ECFP4 | 1024      |
| 4   |                     | ECFP6 | 1024      |
| 5   |                     | FCFP2 | 1024      |
| 6   |                     | FCFP4 | 1024      |
| 7   |                     | FCFP6 | 1024      |
| 8   | Path-based          | RDK5  | 1024      |
| 9   |                     | RDK6  | 1024      |

|    |                        |         |       |
|----|------------------------|---------|-------|
| 10 |                        | RDK7    | 1024  |
| 11 |                        | HashAP  | 1024  |
| 12 |                        | HashTT  | 1024  |
| 13 | Substructure-based     | MACCS   | 167   |
| 14 |                        | Avalon  | 1024  |
| 15 | Longer version-based   | LECFP4  | 16384 |
| 16 |                        | LECFP6  | 16384 |
| 17 |                        | LFCFP4  | 16384 |
| 18 |                        | LFCFP6  | 16384 |
| 19 |                        | LAvalon | 16384 |
| 20 | Pharmacophore-based    | TPATF   | 2692  |
| 21 | Physicochemistry-based | RDKDes  | 208   |

**Supplementary Table 30:** The parameter details in the pre-training phase.

| <b>Model details</b>       |                                                                                                                                                                           |
|----------------------------|---------------------------------------------------------------------------------------------------------------------------------------------------------------------------|
| Backbone of VideoMol       | 12-layer Vision Transformer with 16 patches                                                                                                                               |
| Axis Classifier            | 2 layers of fully connected neural network, where the first layer has a Softplus activation function and the number of output neurons in the last layer is task-dependent |
| Rotation Classifier        |                                                                                                                                                                           |
| Angle Classifier           |                                                                                                                                                                           |
| Chemical Classifier        |                                                                                                                                                                           |
| <b>Training parameters</b> |                                                                                                                                                                           |
| Temperature                | 0.1                                                                                                                                                                       |
| Learning Rate              | 0.01                                                                                                                                                                      |
| Batch Size                 | 256                                                                                                                                                                       |
| Momentum                   | 0.9                                                                                                                                                                       |
| Weight Decay               | 1.00E-04                                                                                                                                                                  |
| Learning Rate Decay        | Linear                                                                                                                                                                    |
| Video Size                 | 60×3×224×224                                                                                                                                                              |
| Training Step              | >400k                                                                                                                                                                     |
| Validation split           | random split with 90% training set and 10% validation set                                                                                                                 |
| <b>Training Platform</b>   |                                                                                                                                                                           |
| CPU                        | Intel 6248R 48C@3.0GHz                                                                                                                                                    |
| GPU                        | 4 * NVIDIA TESLA A100 (40G)                                                                                                                                               |

**Supplementary Table 31:** Basic statistical information of 10 kinases and 10 GPCRs. #Molecules represents the number of molecules. #Tasks represents the number of binary prediction task. Target represents the type of target, such as kinases and GPCRs.

| Dataset       | #Molecules | #Tasks | Target  | Metric       | Type           |
|---------------|------------|--------|---------|--------------|----------------|
| BTK           | 106        | 1      | Kinases | ROC-AUC      | Classification |
| CDK4-cyclinD3 | 80         |        |         |              |                |
| EGFR          | 105        |        |         |              |                |
| FGFR1         | 108        |        |         |              |                |
| FGFR2         | 109        |        |         |              |                |
| FGFR3         | 107        |        |         |              |                |
| FGFR4         | 107        |        |         |              |                |
| FLT3          | 110        |        |         |              |                |
| KPCD3         | 109        |        |         |              |                |
| MET           | 105        |        |         |              |                |
| AA1R          | 3408       | 1      | GPCRs   | RMSE and MAE | Regression     |
| 5HT1A         | 3568       |        |         |              |                |
| 5HT2A         | 3079       |        |         |              |                |
| AA2AR         | 3866       |        |         |              |                |
| AA3R          | 3306       |        |         |              |                |
| CNR2          | 3079       |        |         |              |                |
| DRD2          | 5771       |        |         |              |                |

|      |      |  |  |  |  |
|------|------|--|--|--|--|
| DRD3 | 3945 |  |  |  |  |
| HRH3 | 3206 |  |  |  |  |
| OPRM | 2977 |  |  |  |  |

**Supplementary Table 32:** Basic statistical information of MoleculeNet

benchmark datasets. #Molecules represents the number of molecules.

#Tasks represent the number of binary prediction task.

| Dataset  | #Molecules | #Tasks | Property           | Metric  | Type           |
|----------|------------|--------|--------------------|---------|----------------|
| BBBP     | 2039       | 1      | Pharmacology       | ROC-AUC | Classification |
| Tox21    | 7831       | 12     | Pharmacology       |         |                |
| SIDER    | 1427       | 27     | Pharmacology       |         |                |
| HIV      | 41127      | 1      | Biophysics         |         |                |
| BACE     | 1513       | 1      |                    |         |                |
| ToxCast  | 8575       | 617    | Pharmacology       |         |                |
| FreeSolv | 642        | 1      | Physical chemistry | RMSE    | Regression     |
| ESOL     | 1128       | 1      |                    |         |                |
| Lipo     | 4200       | 1      |                    |         |                |
| QM7      | 6830       | 1      | Quantum chemistry  | MAE     |                |
| QM8      | 21786      | 12     |                    |         |                |
| QM9      | 133885     | 8      |                    |         |                |

**Supplementary Table 33:** Basic statistical information of 11 SARS-CoV-2

datasets with classification task. #Train, #Val and #Test represent the

numbers of train set, valid set, and test set, respectively. #Effects indicates how the drug influences SARS-CoV-2. #Tasks represents the number of binary prediction task.

| Dataset     | #Train | #Val | #Test | #Effects               | #Tasks | Metric  |
|-------------|--------|------|-------|------------------------|--------|---------|
| 3CL         | 404    | 87   | 87    | Viral replication      | 1      | ROC-AUC |
| hCYTOX      | 530    | 114  | 114   | Human cell toxicity    |        |         |
| MERS-PPE    | 674    | 145  | 145   | In vitro infectivity   |        |         |
| MERS-PPE_cs | 250    | 54   | 54    |                        |        |         |
| CoV1-PPE    | 1226   | 263  | 263   |                        |        |         |
| CoV1-PPE_cs | 216    | 47   | 47    |                        |        |         |
| CPE         | 691    | 148  | 149   | Live virus infectivity |        |         |
| Cytotox     | 1569   | 336  | 337   |                        |        |         |
| ACE2        | 228    | 49   | 49    | Viral entry            |        |         |
| AlphaLISA   | 1089   | 233  | 234   |                        |        |         |
| TruHit      | 1175   | 251  | 252   |                        |        |         |

**Supplementary Table 34:** The general framework of VideoMol for fine-tuning.

Identity layer represents identity mapping.

| name       | description                            |
|------------|----------------------------------------|
| base model | pretrained video encoder               |
| dropout1   | Dropout with a dropout ratio of 0 to 1 |
| linear1    | Linear layer or Identity layer         |
| activator  | Activator                              |
| dropout2   | Dropout with a dropout ratio of 0 to 1 |
| linear2    | Linear layer                           |

**Supplementary Table 35:** The hyperparameters in fine-tuning of VideoMol.

| Hyperparameter | Molecular property prediction                    | Binding activity prediction                                       |
|----------------|--------------------------------------------------|-------------------------------------------------------------------|
| dropout1       | 0                                                | 0                                                                 |
| linear1        | Linear layer                                     | [Identify layer, Linear layer]                                    |
| activator      | [Gelu, Softplus, None]                           | None                                                              |
| dropout2       | [0.3, 0.5, 0.8]                                  | [0, 0.2]                                                          |
| linear2        | [Identify layer, Linear layer]                   | [Identify layer, Linear layer]                                    |
| Learning rate  | [8e-5, 3e-4, 5e-4, 8e-4, 3e-3, 5e-3, 0.03, 0.05] | [1e-4, 5e-4, 8e-4, 1e-3, 3e-3, 5e-3, 8e-3, 1e-2, 3e-2, 5e-2, 0.1] |
| Batch size     | [8, 16]                                          | [8, 16, 32, 64, 128]                                              |
| Epochs         | [2, 5, 10, 30]                                   | 10~60                                                             |
| Warmup ratio   | 0                                                | 0                                                                 |
| Seed           | [0, 1, 2, 3, 4, 5, 6, 7, 8, 9]                   | [0, 1, 2]                                                         |

**Supplementary Table 36:** The computational requirements in the pre-training,

fine-tuning, and screening stages. #frame/batch represents the number of

frames in a batch. #samples represents the total number of molecules.

#frame/video indicates how many frames of a video to select for inference.

(.xlsx)

| <b>(a) The computational requirements in the pre-training stage.</b> |              |            |                   |                                                      |
|----------------------------------------------------------------------|--------------|------------|-------------------|------------------------------------------------------|
| #samples                                                             | #frame/batch | GPU memory | Training time     | Server                                               |
| 2 million                                                            | 256          | ~37G       | ~9 hours/epoch    | CPU: Intel 6248R 48C@3.0GHz;<br>GPU: A100 (40G)      |
| <b>(b) The computational requirements in the fine-tuning stage.</b>  |              |            |                   |                                                      |
| #samples                                                             | #frame/batch | GPU memory | Training time     | Server                                               |
| 10,000                                                               | 8            | 2.3G       | ~26 minutes/epoch | CPU: 13th Gen Intel® Core™ i7-13700K<br>GPU: 4090 Ti |
|                                                                      | 16           | 2.6G       | ~15 minutes/epoch |                                                      |
|                                                                      | 32           | 3.2G       | ~12 minutes/epoch |                                                      |
|                                                                      | 64           | 4.3G       | ~12 minutes/epoch |                                                      |

|                                                                   |              |               | h                    |            |                                                      |
|-------------------------------------------------------------------|--------------|---------------|----------------------|------------|------------------------------------------------------|
|                                                                   | 128          | 6.5G          | ~12<br>minutes/epoch |            |                                                      |
|                                                                   | 256          | 10.7G         | ~12<br>minutes/epoch |            |                                                      |
| <b>(c) The computational requirements in the screening stage.</b> |              |               |                      |            |                                                      |
| #samples                                                          | #frame/video | #videos/batch | inference time       | GPU memory | Server                                               |
| 1 million                                                         | 1            | 480           | ~9 minutes           | 17.7 G     | CPU: 13th Gen Intel® Core™ i7-13700K<br>GPU: 4090 Ti |
|                                                                   | 5            | 96            | ~48 minutes          |            |                                                      |
|                                                                   | 10           | 48            | ~90 minutes          |            |                                                      |
|                                                                   | 20           | 24            | ~3 hours             |            |                                                      |
|                                                                   | 30           | 16            | ~4.5 hours           |            |                                                      |
|                                                                   | 60           | 8             | ~9 hours             |            |                                                      |



## Supplementary References

1. Nakata, M. & Shimazaki, T. PubChemQC project: a large-scale first-principles electronic structure database for data-driven chemistry. *J. Chem. Informat. Model.* **57**, 1300-1308 (2017).
2. Zeng, X. et al. Accurate prediction of molecular properties and drug targets using a self-supervised image representation learning framework. *Nat. Mach. Intell.* **4**, 1004-1016 (2022).
3. Wu, Z. et al. MoleculeNet: a benchmark for molecular machine learning. *Chem. Sci.* **9**, 513-530 (2018).
4. Bradski, G. The opencv library. *Dr. Dobb's Journal: Software Tools for the Professional Programmer* **25**, 120-123 (2000).
5. Bocci, G. et al. A machine learning platform to estimate anti-SARS-CoV-2 activities. *Nat. Mach. Intell.*, 1-9 (2021).
6. Gaulton, A. et al. The ChEMBL database in 2017. *Nucleic Acids Res.* **45**, D945-D954 (2017).
7. González, A. et al. Ubiquitination regulates ER-phagy and remodelling of endoplasmic reticulum. *Nature*, 1-8 (2023).
8. Guo, J. et al. A tripartite rheostat controls self-regulated host plant resistance to insects. *Nature*, 1-9 (2023).
9. Fidelle, M. et al. A microbiota-modulated checkpoint directs immunosuppressive intestinal T cells into cancers. *Science* **380**, eabo2296 (2023).
10. Wishart, D.S. et al. DrugBank 5.0: a major update to the DrugBank database for 2018. *Nucleic Acids Res.* **46**, D1074-D1082 (2018).
11. Sud, M. MayaChemTools: an open source package for computational drug discovery. *J. Chem. Informat. Model.* **56**, 2292-2297 (2016).
12. Abramson, J. et al. Accurate structure prediction of biomolecular interactions with AlphaFold 3. *Nature*, 1-3 (2024).
13. Balias, T.E., Tan, Y.S. & Chakrabarti, M. DOCK 6: Incorporating hierarchical traversal through precomputed ligand conformations to enable large-scale docking. *J. Comput. Chem.* **45**, 47-63 (2024).
