# Supplementary material for: A molecular video-derived foundation model for scientific drug discovery
Source: PubMed Central journal article supplement — Nat Commun. 2024 Nov 8;15:9696. doi: 10.1038/s41467-024-53742-z (PMC11549228; doi:10.1038/s41467-024-53742-z), 2024-11-08
Supplement: 41467_2024_53742_MOESM2_ESM.pdf [file 41467_2024_53742_MOESM2_ESM.pdf]

### A Molecular Video-derived Foundation Model for Scientific Drug Discovery

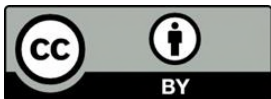

**Open Access** This file is licensed under a Creative Commons Attribution 4.0 International License, which permits use, sharing, adaptation, distribution and reproduction in any medium or format, as long as you give appropriate credit to the original author(s) and the source, provide a link to the Creative Commons license, and indicate if changes were made. In the cases where the authors are anonymous, such as is the case for the reports of anonymous peer reviewers, author attribution should be to 'Anonymous Referee' followed by a clear attribution to the source work. The images or other third party material in this file are included in the article's Creative Commons license, unless indicated otherwise in a credit line to the material. If material is not included in the article's Creative Commons license and your intended use is not permitted by statutory regulation or exceeds the permitted use, you will need to obtain permission directly from the copyright holder. To view a copy of this license, visit <http://creativecommons.org/licenses/by/4.0/>.

## **REVIEWER COMMENTS**

### **Reviewer #2 (Remarks to the Author):**

#### Summary:

The authors propose a molecular video-based foundation model, VideoMol, targeted at representation learning for 3D conformers downstream tasks. To learn useful representations of conformers, VideoMol is trained with three self-supervised learning strategies: Direction-Aware Pretraining Video-Aware Pretraining and Chemical-Aware pretraining, Then subsequently fine-tuned on different prediction tasks. An advantage the proposed method over similar deep learning approaches, is the provided interpretability through denoting key chemical substructures related to 3D conformational changes that according to the manuscript overlap with previous domain knowledge. The experiments show promising results of VideoMol in diverse drug discovery datasets for predicting molecular targets and properties.

The manuscript is well written and self contained. The authors made the effort to include diverse set of baselines including foundation models learnt on sequence, structure and image which gives a nice comparison across the current landscape of available methods. All experiments and results are described in detail and highlight multiple advantages of video-based features compared to current SOTA. It is encouraging that the inhibitors suggested by VideoMol overlap, to some extent, to results from other published domain studies.

#### Questions:

1. As the authors mentioned themselves, using videos increases complexity of conformer prediction models, which is an already challenging setup because of the 3D structure learning. Are the 60 frames the minimal or optimal number of frames to be used? Has this been explored?
2. Could the authors elaborate on how helpful will the features learned by VideoMol without fine tuning for a new dataset? Would it be beneficial for practitioners to use VideoMol as pretrained models to extract features and then use those for downstream tasks (without fine tuning)?
3. Why is there no standard error/deviation for any of the results? Have the experiments been repeated multiple times? Having some indication about the uncertainty intervals around the results would be appreciated.
4. It will help if the authors include some intuition on why videos make more sense and contribute to learning better features. It is not so easy to understand for readers that are less experienced with conformers. Some running/motivating example could help the presentation.
5. How sensitive is the framework to the source for video generation, in this case RDKit. I assume it is quite dependent on this platform, and thus, VideoMol probably does not allow for mixing videos from different sources. Does this pose any kind of limitation in real-world applications?

## **Reviewer #2 (Remarks on code availability):**

The provided code is clean and well organised. The authors also included a docker image for setting up the environment. The code for training the model as well as reproducing the results is included. I believe only the code for VideoMol is provided, and not for the baseline methods. Not necessary, but if it is easy to include the related methods, the community might appreciate a full testbed.

## **Reviewer #3 (Remarks to the Author):**

Noteworthy results:

The manuscript presents a video-based pretrained model that can be used to make downstream task predictions across multiple tasks with finetuning. The results are an improvement upon authors' previous work, ImageMol. The improvement is tied to use of video, which can be considered as an augmentation to static images, as well as the use of more comprehensive fingerprints that provide chemical, pharmacological and physicochemistry information. The authors show, through extensive testing, that the new model outperforms the previous and is at least as good or as better as some SOTA models for different tasks.

Impact to field:

The work is valuable to the field in multiple areas: it is a demonstration of technology transfer from video representation learning. It shows new self supervision tasks that are meaningful for molecule structure videos. It identifies a large set of benchmark cases. However I see major drawbacks or open questions that would limit its use beyond limited academic interest:

- Unlike stated, the model does not capture a dynamic conformation of the molecule. The videos are not generated to represent any physical dynamics, or conformer change, or changes to torsion angles etc. They are movies with standardized rotations around given axis. As such, they are only augmentations to enrich the model input about the 3d structure of the molecule. Authors should consider another wording than dynamics to prevent misleading the reader.

- if the manuscript's main aim was to inject more information about the 3d nature of the molecules, they could have considered an equivariant graph neural network or transformer. An equivariant neural network would remove the need to perform augmentation for different rotations.

- This is where it gets interesting: if the success of the model was truly due to better representation of 3d structure, we would expect the model to be sensitive to different conformers, especially on tasks that provide a binding affinity proxy. While, in multiple places in the manuscript the opposite is claimed, that model is robust to molecule conformer choice. Perhaps authors can devise an experiment to understand why video information does not lead to sensitivity to conformer.

- Which makes me think the success of the model is not due to better 3d representation but one of the several other changes: 1-working with video frames and the new self-supervision tasks have

expanded the effective size of the data and complexity the network processes each molecule (perhaps this is why the number of frames seem to change the prediction accuracy) 2-the large number of domain information that is crafted into the fingerprint may be impactful in several tasks in this work. Further understanding from where exactly the accuracy improvement comes from, can be considered for future work. In the meantime, the claims of impact of 3D could be dialed down.

-Feedback to the methodology: the splits used in this work would not stop data leaking from train to validation sets and scaffold balancing might not be enough. Indeed we see a hint of the issue in the COX examples where training data from ChEMBL in 8:1:1 split gave high ROC-AU >0.9, but when the model was tested against MedChemExpress data, only less than 40% of inhibitors are successfully identified. This difference may be due to data leak in the high ROC-AUC train-test data, inflating the apparent generalizability. In general if authors would like to claim generalizability, more attention to the split strategy, overlap between data points is needed according to certain similarity metric will be needed.

-Some of the tasks in the work are for high-throughput applications (e.g. virtual screening). In such cases the trade-off between accuracy and compute becomes important. The proposed method should clearly state the compute needs for pretraining and various downstream tasks. Because it works with video, compared to much smaller atomic position files, memory needs should be highlighted too.

-minor typos in text, highlighting one that is on figure in case it escapes proofreading: angel -> angle  
Fig 1b

**Reviewer #3 (Remarks on code availability):**

Lightly reviewed code. Checked the pretraining tools and the base encoder model definition. Looks rather standard, didn't see any weird libraries or so. Didn't run but I didn't see a reason why it wouldn't. Also there are links to pretraining data and to pretrained model to reproduce inference results in the paper.

# Point-by-Point Response Letter

**Manuscript #: NCOMMS-23-62188**

We are grateful to the reviewers for their insightful and constructive feedback on our manuscript. In response to the feedback, we provide the detailed responses to address each reviewer's concerns point by point as follows.

## Responses to the Reviewer #1

**Overall Summary** – “The authors made the effort to include diverse set of baselines, a **nice comparison** across the current landscape of available methods. All experiments and results are described in detail and highlight **multiple advantages** of video-based features. The manuscript is **well written**” –

|                  |                                                                                                                                                                                                                                                                                                                                                                                                                                                                                                                                                                                                                                                                                                                                                                                                                                                                                                                                                                                                                                                                                                                                                                                                                                                                                                                                                                                                 |
|------------------|-------------------------------------------------------------------------------------------------------------------------------------------------------------------------------------------------------------------------------------------------------------------------------------------------------------------------------------------------------------------------------------------------------------------------------------------------------------------------------------------------------------------------------------------------------------------------------------------------------------------------------------------------------------------------------------------------------------------------------------------------------------------------------------------------------------------------------------------------------------------------------------------------------------------------------------------------------------------------------------------------------------------------------------------------------------------------------------------------------------------------------------------------------------------------------------------------------------------------------------------------------------------------------------------------------------------------------------------------------------------------------------------------|
| Reviewer Comment | <p>The authors propose a molecular video-based foundation model, VideoMol, targeted at representation learning for 3D conformers downstream tasks. To learn useful representations of conformers, VideoMol is trained with three self-supervised learning strategies: Direction-Aware Pretraining Video-Aware Pretraining and Chemical-Aware pretraining, Then subsequently fine-tuned on different prediction tasks. An advantage the proposed method over similar deep learning approaches, is the provided interpretability through denoting key chemical substructures related to 3D conformational changes that according to the manuscript overlap with previous domain knowledge. The experiments show promising results of VideoMol in diverse drug discovery datasets for predicting molecular targets and properties.</p> <p>The manuscript is well written and self contained. The authors made the effort to include diverse set of baselines including foundation models learnt on sequence, structure and image which gives a nice comparison across the current landscape of available methods. All experiments and results are described in detail and highlight multiple advantages of video-based features compared to current SOTA. It is encouraging that the inhibitors suggested by VideoMol overlap, to some extent, to results from other published domain studies.</p> |
| Author Response  | <p>We thank the Reviewer for comprehensive summary and his/her positive support on the manuscript. We have made extensive revision to address the reviewer's critiques as below.</p>                                                                                                                                                                                                                                                                                                                                                                                                                                                                                                                                                                                                                                                                                                                                                                                                                                                                                                                                                                                                                                                                                                                                                                                                            |

**Ref 1.1 – “Are the 60 frames the minimal or optimal number of frames to be used? Has this been explored?” –**

| Reviewer Comment                | As the authors mentioned themselves, using videos increases complexity of conformer prediction models, which is an already challenging setup because of the 3D structure learning. Are the 60 frames the minimal or optimal number of frames to be used? Has this been explored?                                                                                                                                                                                                                                                                                                                                                                                                                                                                                                                                                                                                                                                                                                                                                                                                                                                                                                                                                                                                                                                                                                                                                                                                                                                                                                                                                                                                                                                                                                                                                                                                                                                                                                                                                                                                                                                                                                                                                                                                                                                                                                                                                                                                                                                                                                                                                                                                                                                                                                                                                                                                                                                                                                                                                                                                                                                                                                                  |                    |                    |                    |                    |                    |       |  |      |     |      |     |      |     |   |             |             |             |             |             |             |    |             |             |             |             |             |             |    |             |             |             |             |             |             |    |             |             |             |             |             |             |    |                    |                    |                    |                    |                    |                    |        |      |  |      |  |      |  |      |     |      |     |      |     |   |             |             |             |             |             |             |    |             |             |             |             |             |             |    |             |             |             |             |             |             |    |             |             |             |             |             |             |    |                    |                    |                    |                    |                    |                    |
|---------------------------------|---------------------------------------------------------------------------------------------------------------------------------------------------------------------------------------------------------------------------------------------------------------------------------------------------------------------------------------------------------------------------------------------------------------------------------------------------------------------------------------------------------------------------------------------------------------------------------------------------------------------------------------------------------------------------------------------------------------------------------------------------------------------------------------------------------------------------------------------------------------------------------------------------------------------------------------------------------------------------------------------------------------------------------------------------------------------------------------------------------------------------------------------------------------------------------------------------------------------------------------------------------------------------------------------------------------------------------------------------------------------------------------------------------------------------------------------------------------------------------------------------------------------------------------------------------------------------------------------------------------------------------------------------------------------------------------------------------------------------------------------------------------------------------------------------------------------------------------------------------------------------------------------------------------------------------------------------------------------------------------------------------------------------------------------------------------------------------------------------------------------------------------------------------------------------------------------------------------------------------------------------------------------------------------------------------------------------------------------------------------------------------------------------------------------------------------------------------------------------------------------------------------------------------------------------------------------------------------------------------------------------------------------------------------------------------------------------------------------------------------------------------------------------------------------------------------------------------------------------------------------------------------------------------------------------------------------------------------------------------------------------------------------------------------------------------------------------------------------------------------------------------------------------------------------------------------------------|--------------------|--------------------|--------------------|--------------------|--------------------|-------|--|------|-----|------|-----|------|-----|---|-------------|-------------|-------------|-------------|-------------|-------------|----|-------------|-------------|-------------|-------------|-------------|-------------|----|-------------|-------------|-------------|-------------|-------------|-------------|----|-------------|-------------|-------------|-------------|-------------|-------------|----|--------------------|--------------------|--------------------|--------------------|--------------------|--------------------|--------|------|--|------|--|------|--|------|-----|------|-----|------|-----|---|-------------|-------------|-------------|-------------|-------------|-------------|----|-------------|-------------|-------------|-------------|-------------|-------------|----|-------------|-------------|-------------|-------------|-------------|-------------|----|-------------|-------------|-------------|-------------|-------------|-------------|----|--------------------|--------------------|--------------------|--------------------|--------------------|--------------------|
| Author Response                 | <p>We thank the Reviewer for this great point about the optimized number of frames. We used the 60 frames after balancing both the optimized model performance and the computational cost. We explored the impact of frame number on the model performance in <b>Supplementary Table 26</b>, including 5 frames, 10 frames, 20 frames, 30 frames and 60 frames. We found that the increased number of frames improve the performance of the models. After balancing computing time and the optimized model performance by the increased number of frames, we selected 60 frames. We have added these new results and more detailed explanations in the revised manuscript.</p> <p>Supplementary Table 26: Effect of frame number on VideoMol on 6 regression datasets with balanced scaffold split. #frame indicates the number of frames. All means and standard deviations are reported through three independent runs.</p> <table border="1" data-bbox="427 919 1421 1423"> <thead> <tr> <th rowspan="2">#frame</th> <th colspan="2">5HT1A</th> <th colspan="2">AA1R</th> <th colspan="2">AA2AR</th> </tr> <tr> <th>RMSE</th> <th>MAE</th> <th>RMSE</th> <th>MAE</th> <th>RMSE</th> <th>MAE</th> </tr> </thead> <tbody> <tr> <td>5</td> <td>0.873±0.023</td> <td>0.693±0.012</td> <td>0.847±0.013</td> <td>0.656±0.025</td> <td>0.824±0.009</td> <td>0.659±0.012</td> </tr> <tr> <td>10</td> <td>0.800±0.025</td> <td>0.624±0.017</td> <td>0.773±0.010</td> <td>0.584±0.006</td> <td>0.766±0.002</td> <td>0.609±0.005</td> </tr> <tr> <td>20</td> <td>0.765±0.026</td> <td>0.591±0.010</td> <td>0.728±0.003</td> <td>0.546±0.005</td> <td>0.744±0.005</td> <td>0.586±0.005</td> </tr> <tr> <td>30</td> <td>0.742±0.014</td> <td>0.573±0.011</td> <td>0.704±0.004</td> <td>0.527±0.001</td> <td>0.736±0.019</td> <td>0.570±0.013</td> </tr> <tr> <td>60</td> <td><b>0.708±0.017</b></td> <td><b>0.547±0.015</b></td> <td><b>0.655±0.007</b></td> <td><b>0.496±0.006</b></td> <td><b>0.712±0.011</b></td> <td><b>0.543±0.005</b></td> </tr> </tbody> </table><br><table border="1" data-bbox="427 1171 1421 1423"> <thead> <tr> <th rowspan="2">#frame</th> <th colspan="2">CNR2</th> <th colspan="2">DRD2</th> <th colspan="2">HRH3</th> </tr> <tr> <th>RMSE</th> <th>MAE</th> <th>RMSE</th> <th>MAE</th> <th>RMSE</th> <th>MAE</th> </tr> </thead> <tbody> <tr> <td>5</td> <td>0.991±0.032</td> <td>0.811±0.027</td> <td>0.875±0.016</td> <td>0.660±0.012</td> <td>0.733±0.017</td> <td>0.567±0.009</td> </tr> <tr> <td>10</td> <td>0.950±0.032</td> <td>0.762±0.039</td> <td>0.822±0.014</td> <td>0.620±0.003</td> <td>0.696±0.013</td> <td>0.540±0.014</td> </tr> <tr> <td>20</td> <td>0.910±0.016</td> <td>0.721±0.011</td> <td>0.792±0.001</td> <td>0.600±0.004</td> <td>0.679±0.019</td> <td>0.521±0.014</td> </tr> <tr> <td>30</td> <td>0.890±0.013</td> <td>0.700±0.009</td> <td>0.769±0.005</td> <td>0.580±0.003</td> <td>0.686±0.019</td> <td>0.531±0.015</td> </tr> <tr> <td>60</td> <td><b>0.864±0.005</b></td> <td><b>0.679±0.010</b></td> <td><b>0.742±0.004</b></td> <td><b>0.556±0.005</b></td> <td><b>0.668±0.008</b></td> <td><b>0.506±0.002</b></td> </tr> </tbody> </table> | #frame             | 5HT1A              |                    | AA1R               |                    | AA2AR |  | RMSE | MAE | RMSE | MAE | RMSE | MAE | 5 | 0.873±0.023 | 0.693±0.012 | 0.847±0.013 | 0.656±0.025 | 0.824±0.009 | 0.659±0.012 | 10 | 0.800±0.025 | 0.624±0.017 | 0.773±0.010 | 0.584±0.006 | 0.766±0.002 | 0.609±0.005 | 20 | 0.765±0.026 | 0.591±0.010 | 0.728±0.003 | 0.546±0.005 | 0.744±0.005 | 0.586±0.005 | 30 | 0.742±0.014 | 0.573±0.011 | 0.704±0.004 | 0.527±0.001 | 0.736±0.019 | 0.570±0.013 | 60 | <b>0.708±0.017</b> | <b>0.547±0.015</b> | <b>0.655±0.007</b> | <b>0.496±0.006</b> | <b>0.712±0.011</b> | <b>0.543±0.005</b> | #frame | CNR2 |  | DRD2 |  | HRH3 |  | RMSE | MAE | RMSE | MAE | RMSE | MAE | 5 | 0.991±0.032 | 0.811±0.027 | 0.875±0.016 | 0.660±0.012 | 0.733±0.017 | 0.567±0.009 | 10 | 0.950±0.032 | 0.762±0.039 | 0.822±0.014 | 0.620±0.003 | 0.696±0.013 | 0.540±0.014 | 20 | 0.910±0.016 | 0.721±0.011 | 0.792±0.001 | 0.600±0.004 | 0.679±0.019 | 0.521±0.014 | 30 | 0.890±0.013 | 0.700±0.009 | 0.769±0.005 | 0.580±0.003 | 0.686±0.019 | 0.531±0.015 | 60 | <b>0.864±0.005</b> | <b>0.679±0.010</b> | <b>0.742±0.004</b> | <b>0.556±0.005</b> | <b>0.668±0.008</b> | <b>0.506±0.002</b> |
| #frame                          | 5HT1A                                                                                                                                                                                                                                                                                                                                                                                                                                                                                                                                                                                                                                                                                                                                                                                                                                                                                                                                                                                                                                                                                                                                                                                                                                                                                                                                                                                                                                                                                                                                                                                                                                                                                                                                                                                                                                                                                                                                                                                                                                                                                                                                                                                                                                                                                                                                                                                                                                                                                                                                                                                                                                                                                                                                                                                                                                                                                                                                                                                                                                                                                                                                                                                             |                    | AA1R               |                    | AA2AR              |                    |       |  |      |     |      |     |      |     |   |             |             |             |             |             |             |    |             |             |             |             |             |             |    |             |             |             |             |             |             |    |             |             |             |             |             |             |    |                    |                    |                    |                    |                    |                    |        |      |  |      |  |      |  |      |     |      |     |      |     |   |             |             |             |             |             |             |    |             |             |             |             |             |             |    |             |             |             |             |             |             |    |             |             |             |             |             |             |    |                    |                    |                    |                    |                    |                    |
|                                 | RMSE                                                                                                                                                                                                                                                                                                                                                                                                                                                                                                                                                                                                                                                                                                                                                                                                                                                                                                                                                                                                                                                                                                                                                                                                                                                                                                                                                                                                                                                                                                                                                                                                                                                                                                                                                                                                                                                                                                                                                                                                                                                                                                                                                                                                                                                                                                                                                                                                                                                                                                                                                                                                                                                                                                                                                                                                                                                                                                                                                                                                                                                                                                                                                                                              | MAE                | RMSE               | MAE                | RMSE               | MAE                |       |  |      |     |      |     |      |     |   |             |             |             |             |             |             |    |             |             |             |             |             |             |    |             |             |             |             |             |             |    |             |             |             |             |             |             |    |                    |                    |                    |                    |                    |                    |        |      |  |      |  |      |  |      |     |      |     |      |     |   |             |             |             |             |             |             |    |             |             |             |             |             |             |    |             |             |             |             |             |             |    |             |             |             |             |             |             |    |                    |                    |                    |                    |                    |                    |
| 5                               | 0.873±0.023                                                                                                                                                                                                                                                                                                                                                                                                                                                                                                                                                                                                                                                                                                                                                                                                                                                                                                                                                                                                                                                                                                                                                                                                                                                                                                                                                                                                                                                                                                                                                                                                                                                                                                                                                                                                                                                                                                                                                                                                                                                                                                                                                                                                                                                                                                                                                                                                                                                                                                                                                                                                                                                                                                                                                                                                                                                                                                                                                                                                                                                                                                                                                                                       | 0.693±0.012        | 0.847±0.013        | 0.656±0.025        | 0.824±0.009        | 0.659±0.012        |       |  |      |     |      |     |      |     |   |             |             |             |             |             |             |    |             |             |             |             |             |             |    |             |             |             |             |             |             |    |             |             |             |             |             |             |    |                    |                    |                    |                    |                    |                    |        |      |  |      |  |      |  |      |     |      |     |      |     |   |             |             |             |             |             |             |    |             |             |             |             |             |             |    |             |             |             |             |             |             |    |             |             |             |             |             |             |    |                    |                    |                    |                    |                    |                    |
| 10                              | 0.800±0.025                                                                                                                                                                                                                                                                                                                                                                                                                                                                                                                                                                                                                                                                                                                                                                                                                                                                                                                                                                                                                                                                                                                                                                                                                                                                                                                                                                                                                                                                                                                                                                                                                                                                                                                                                                                                                                                                                                                                                                                                                                                                                                                                                                                                                                                                                                                                                                                                                                                                                                                                                                                                                                                                                                                                                                                                                                                                                                                                                                                                                                                                                                                                                                                       | 0.624±0.017        | 0.773±0.010        | 0.584±0.006        | 0.766±0.002        | 0.609±0.005        |       |  |      |     |      |     |      |     |   |             |             |             |             |             |             |    |             |             |             |             |             |             |    |             |             |             |             |             |             |    |             |             |             |             |             |             |    |                    |                    |                    |                    |                    |                    |        |      |  |      |  |      |  |      |     |      |     |      |     |   |             |             |             |             |             |             |    |             |             |             |             |             |             |    |             |             |             |             |             |             |    |             |             |             |             |             |             |    |                    |                    |                    |                    |                    |                    |
| 20                              | 0.765±0.026                                                                                                                                                                                                                                                                                                                                                                                                                                                                                                                                                                                                                                                                                                                                                                                                                                                                                                                                                                                                                                                                                                                                                                                                                                                                                                                                                                                                                                                                                                                                                                                                                                                                                                                                                                                                                                                                                                                                                                                                                                                                                                                                                                                                                                                                                                                                                                                                                                                                                                                                                                                                                                                                                                                                                                                                                                                                                                                                                                                                                                                                                                                                                                                       | 0.591±0.010        | 0.728±0.003        | 0.546±0.005        | 0.744±0.005        | 0.586±0.005        |       |  |      |     |      |     |      |     |   |             |             |             |             |             |             |    |             |             |             |             |             |             |    |             |             |             |             |             |             |    |             |             |             |             |             |             |    |                    |                    |                    |                    |                    |                    |        |      |  |      |  |      |  |      |     |      |     |      |     |   |             |             |             |             |             |             |    |             |             |             |             |             |             |    |             |             |             |             |             |             |    |             |             |             |             |             |             |    |                    |                    |                    |                    |                    |                    |
| 30                              | 0.742±0.014                                                                                                                                                                                                                                                                                                                                                                                                                                                                                                                                                                                                                                                                                                                                                                                                                                                                                                                                                                                                                                                                                                                                                                                                                                                                                                                                                                                                                                                                                                                                                                                                                                                                                                                                                                                                                                                                                                                                                                                                                                                                                                                                                                                                                                                                                                                                                                                                                                                                                                                                                                                                                                                                                                                                                                                                                                                                                                                                                                                                                                                                                                                                                                                       | 0.573±0.011        | 0.704±0.004        | 0.527±0.001        | 0.736±0.019        | 0.570±0.013        |       |  |      |     |      |     |      |     |   |             |             |             |             |             |             |    |             |             |             |             |             |             |    |             |             |             |             |             |             |    |             |             |             |             |             |             |    |                    |                    |                    |                    |                    |                    |        |      |  |      |  |      |  |      |     |      |     |      |     |   |             |             |             |             |             |             |    |             |             |             |             |             |             |    |             |             |             |             |             |             |    |             |             |             |             |             |             |    |                    |                    |                    |                    |                    |                    |
| 60                              | <b>0.708±0.017</b>                                                                                                                                                                                                                                                                                                                                                                                                                                                                                                                                                                                                                                                                                                                                                                                                                                                                                                                                                                                                                                                                                                                                                                                                                                                                                                                                                                                                                                                                                                                                                                                                                                                                                                                                                                                                                                                                                                                                                                                                                                                                                                                                                                                                                                                                                                                                                                                                                                                                                                                                                                                                                                                                                                                                                                                                                                                                                                                                                                                                                                                                                                                                                                                | <b>0.547±0.015</b> | <b>0.655±0.007</b> | <b>0.496±0.006</b> | <b>0.712±0.011</b> | <b>0.543±0.005</b> |       |  |      |     |      |     |      |     |   |             |             |             |             |             |             |    |             |             |             |             |             |             |    |             |             |             |             |             |             |    |             |             |             |             |             |             |    |                    |                    |                    |                    |                    |                    |        |      |  |      |  |      |  |      |     |      |     |      |     |   |             |             |             |             |             |             |    |             |             |             |             |             |             |    |             |             |             |             |             |             |    |             |             |             |             |             |             |    |                    |                    |                    |                    |                    |                    |
| #frame                          | CNR2                                                                                                                                                                                                                                                                                                                                                                                                                                                                                                                                                                                                                                                                                                                                                                                                                                                                                                                                                                                                                                                                                                                                                                                                                                                                                                                                                                                                                                                                                                                                                                                                                                                                                                                                                                                                                                                                                                                                                                                                                                                                                                                                                                                                                                                                                                                                                                                                                                                                                                                                                                                                                                                                                                                                                                                                                                                                                                                                                                                                                                                                                                                                                                                              |                    | DRD2               |                    | HRH3               |                    |       |  |      |     |      |     |      |     |   |             |             |             |             |             |             |    |             |             |             |             |             |             |    |             |             |             |             |             |             |    |             |             |             |             |             |             |    |                    |                    |                    |                    |                    |                    |        |      |  |      |  |      |  |      |     |      |     |      |     |   |             |             |             |             |             |             |    |             |             |             |             |             |             |    |             |             |             |             |             |             |    |             |             |             |             |             |             |    |                    |                    |                    |                    |                    |                    |
|                                 | RMSE                                                                                                                                                                                                                                                                                                                                                                                                                                                                                                                                                                                                                                                                                                                                                                                                                                                                                                                                                                                                                                                                                                                                                                                                                                                                                                                                                                                                                                                                                                                                                                                                                                                                                                                                                                                                                                                                                                                                                                                                                                                                                                                                                                                                                                                                                                                                                                                                                                                                                                                                                                                                                                                                                                                                                                                                                                                                                                                                                                                                                                                                                                                                                                                              | MAE                | RMSE               | MAE                | RMSE               | MAE                |       |  |      |     |      |     |      |     |   |             |             |             |             |             |             |    |             |             |             |             |             |             |    |             |             |             |             |             |             |    |             |             |             |             |             |             |    |                    |                    |                    |                    |                    |                    |        |      |  |      |  |      |  |      |     |      |     |      |     |   |             |             |             |             |             |             |    |             |             |             |             |             |             |    |             |             |             |             |             |             |    |             |             |             |             |             |             |    |                    |                    |                    |                    |                    |                    |
| 5                               | 0.991±0.032                                                                                                                                                                                                                                                                                                                                                                                                                                                                                                                                                                                                                                                                                                                                                                                                                                                                                                                                                                                                                                                                                                                                                                                                                                                                                                                                                                                                                                                                                                                                                                                                                                                                                                                                                                                                                                                                                                                                                                                                                                                                                                                                                                                                                                                                                                                                                                                                                                                                                                                                                                                                                                                                                                                                                                                                                                                                                                                                                                                                                                                                                                                                                                                       | 0.811±0.027        | 0.875±0.016        | 0.660±0.012        | 0.733±0.017        | 0.567±0.009        |       |  |      |     |      |     |      |     |   |             |             |             |             |             |             |    |             |             |             |             |             |             |    |             |             |             |             |             |             |    |             |             |             |             |             |             |    |                    |                    |                    |                    |                    |                    |        |      |  |      |  |      |  |      |     |      |     |      |     |   |             |             |             |             |             |             |    |             |             |             |             |             |             |    |             |             |             |             |             |             |    |             |             |             |             |             |             |    |                    |                    |                    |                    |                    |                    |
| 10                              | 0.950±0.032                                                                                                                                                                                                                                                                                                                                                                                                                                                                                                                                                                                                                                                                                                                                                                                                                                                                                                                                                                                                                                                                                                                                                                                                                                                                                                                                                                                                                                                                                                                                                                                                                                                                                                                                                                                                                                                                                                                                                                                                                                                                                                                                                                                                                                                                                                                                                                                                                                                                                                                                                                                                                                                                                                                                                                                                                                                                                                                                                                                                                                                                                                                                                                                       | 0.762±0.039        | 0.822±0.014        | 0.620±0.003        | 0.696±0.013        | 0.540±0.014        |       |  |      |     |      |     |      |     |   |             |             |             |             |             |             |    |             |             |             |             |             |             |    |             |             |             |             |             |             |    |             |             |             |             |             |             |    |                    |                    |                    |                    |                    |                    |        |      |  |      |  |      |  |      |     |      |     |      |     |   |             |             |             |             |             |             |    |             |             |             |             |             |             |    |             |             |             |             |             |             |    |             |             |             |             |             |             |    |                    |                    |                    |                    |                    |                    |
| 20                              | 0.910±0.016                                                                                                                                                                                                                                                                                                                                                                                                                                                                                                                                                                                                                                                                                                                                                                                                                                                                                                                                                                                                                                                                                                                                                                                                                                                                                                                                                                                                                                                                                                                                                                                                                                                                                                                                                                                                                                                                                                                                                                                                                                                                                                                                                                                                                                                                                                                                                                                                                                                                                                                                                                                                                                                                                                                                                                                                                                                                                                                                                                                                                                                                                                                                                                                       | 0.721±0.011        | 0.792±0.001        | 0.600±0.004        | 0.679±0.019        | 0.521±0.014        |       |  |      |     |      |     |      |     |   |             |             |             |             |             |             |    |             |             |             |             |             |             |    |             |             |             |             |             |             |    |             |             |             |             |             |             |    |                    |                    |                    |                    |                    |                    |        |      |  |      |  |      |  |      |     |      |     |      |     |   |             |             |             |             |             |             |    |             |             |             |             |             |             |    |             |             |             |             |             |             |    |             |             |             |             |             |             |    |                    |                    |                    |                    |                    |                    |
| 30                              | 0.890±0.013                                                                                                                                                                                                                                                                                                                                                                                                                                                                                                                                                                                                                                                                                                                                                                                                                                                                                                                                                                                                                                                                                                                                                                                                                                                                                                                                                                                                                                                                                                                                                                                                                                                                                                                                                                                                                                                                                                                                                                                                                                                                                                                                                                                                                                                                                                                                                                                                                                                                                                                                                                                                                                                                                                                                                                                                                                                                                                                                                                                                                                                                                                                                                                                       | 0.700±0.009        | 0.769±0.005        | 0.580±0.003        | 0.686±0.019        | 0.531±0.015        |       |  |      |     |      |     |      |     |   |             |             |             |             |             |             |    |             |             |             |             |             |             |    |             |             |             |             |             |             |    |             |             |             |             |             |             |    |                    |                    |                    |                    |                    |                    |        |      |  |      |  |      |  |      |     |      |     |      |     |   |             |             |             |             |             |             |    |             |             |             |             |             |             |    |             |             |             |             |             |             |    |             |             |             |             |             |             |    |                    |                    |                    |                    |                    |                    |
| 60                              | <b>0.864±0.005</b>                                                                                                                                                                                                                                                                                                                                                                                                                                                                                                                                                                                                                                                                                                                                                                                                                                                                                                                                                                                                                                                                                                                                                                                                                                                                                                                                                                                                                                                                                                                                                                                                                                                                                                                                                                                                                                                                                                                                                                                                                                                                                                                                                                                                                                                                                                                                                                                                                                                                                                                                                                                                                                                                                                                                                                                                                                                                                                                                                                                                                                                                                                                                                                                | <b>0.679±0.010</b> | <b>0.742±0.004</b> | <b>0.556±0.005</b> | <b>0.668±0.008</b> | <b>0.506±0.002</b> |       |  |      |     |      |     |      |     |   |             |             |             |             |             |             |    |             |             |             |             |             |             |    |             |             |             |             |             |             |    |             |             |             |             |             |             |    |                    |                    |                    |                    |                    |                    |        |      |  |      |  |      |  |      |     |      |     |      |     |   |             |             |             |             |             |             |    |             |             |             |             |             |             |    |             |             |             |             |             |             |    |             |             |             |             |             |             |    |                    |                    |                    |                    |                    |                    |
| Excerpt from Revised Manuscript | <p><i>The impact of the video frame number.</i> To explore the impact of different frame numbers on VideoMol, we sampled 5, 10, 20, 30, and 60 molecular frames from 5HT1A, AA1R, AA2AR, CNR2, DRD2, and HRH3 datasets at equal time intervals. We found that the performance of VideoMol is positively correlated with the number of frames with an average performance improvement of 6.5% (5→10 frames), 3.9% (10→20 frames), 2.0% (20→30 frames), 3.9% (30→60 frames) on RMSE metric and 7.6% (5→10 frames), 4.7% (10→20 frames), 2.4% (20→30 frames), 4.4% (30→60 frames) on MAE metric, which shows that the increase of frame number enriches the 3D information extracted by VideoMol and its performance may be expected to be further increased by expanding the frame number (Supplementary Table 26).</p>                                                                                                                                                                                                                                                                                                                                                                                                                                                                                                                                                                                                                                                                                                                                                                                                                                                                                                                                                                                                                                                                                                                                                                                                                                                                                                                                                                                                                                                                                                                                                                                                                                                                                                                                                                                                                                                                                                                                                                                                                                                                                                                                                                                                                                                                                                                                                                             |                    |                    |                    |                    |                    |       |  |      |     |      |     |      |     |   |             |             |             |             |             |             |    |             |             |             |             |             |             |    |             |             |             |             |             |             |    |             |             |             |             |             |             |    |                    |                    |                    |                    |                    |                    |        |      |  |      |  |      |  |      |     |      |     |      |     |   |             |             |             |             |             |             |    |             |             |             |             |             |             |    |             |             |             |             |             |             |    |             |             |             |             |             |             |    |                    |                    |                    |                    |                    |                    |

**Ref 1.2 – “Effectiveness of features learned by VideoMol without fine-tuning on new datasets” –**

| Reviewer Comment | Could the authors elaborate on how helpful will the features learned by VideoMol without fine tuning for a new dataset? Would it be beneficial for practitioners to use VideoMol as pretrained models to extract features and then use those for downstream tasks (without fine tuning)?                                                                                                                                                                                                                                                                                                                                                                                                                                                                                                                                                                                                                                                                                                                                                                                                                                                                                                                                                                                                                                                                                                                                                                                                                                                                                                                                                                                                                                                                                                                                                                                                                                                                                                                                                                                                                                                                                                                                                                                                                                                                                                                                                                                                                                                                                                                                                                                                                                                                                                                                                                                                                                                                                                                                                                                                                                                                                                                                                                                                                                                                                                                                                                                                                                                                                                                                   |                    |                    |                    |                    |                    |         |  |  |      |     |      |     |      |     |                |             |             |             |             |             |             |                  |                    |                    |                    |                    |                    |                    |              |  |  |  |  |  |  |  |          |  |         |  |         |  |  |      |     |      |     |      |     |                |             |             |             |             |             |             |                  |                    |                    |                    |                    |                    |                    |              |  |  |  |  |  |  |  |         |  |         |  |         |  |  |      |     |      |     |      |     |                |             |             |             |             |             |             |                  |                    |                    |                    |                    |                    |                    |              |  |  |  |  |  |  |  |          |  |  |  |  |  |  |      |     |  |  |  |  |                |             |             |  |  |  |  |                  |                    |                    |  |  |  |  |
|------------------|----------------------------------------------------------------------------------------------------------------------------------------------------------------------------------------------------------------------------------------------------------------------------------------------------------------------------------------------------------------------------------------------------------------------------------------------------------------------------------------------------------------------------------------------------------------------------------------------------------------------------------------------------------------------------------------------------------------------------------------------------------------------------------------------------------------------------------------------------------------------------------------------------------------------------------------------------------------------------------------------------------------------------------------------------------------------------------------------------------------------------------------------------------------------------------------------------------------------------------------------------------------------------------------------------------------------------------------------------------------------------------------------------------------------------------------------------------------------------------------------------------------------------------------------------------------------------------------------------------------------------------------------------------------------------------------------------------------------------------------------------------------------------------------------------------------------------------------------------------------------------------------------------------------------------------------------------------------------------------------------------------------------------------------------------------------------------------------------------------------------------------------------------------------------------------------------------------------------------------------------------------------------------------------------------------------------------------------------------------------------------------------------------------------------------------------------------------------------------------------------------------------------------------------------------------------------------------------------------------------------------------------------------------------------------------------------------------------------------------------------------------------------------------------------------------------------------------------------------------------------------------------------------------------------------------------------------------------------------------------------------------------------------------------------------------------------------------------------------------------------------------------------------------------------------------------------------------------------------------------------------------------------------------------------------------------------------------------------------------------------------------------------------------------------------------------------------------------------------------------------------------------------------------------------------------------------------------------------------------------------------|--------------------|--------------------|--------------------|--------------------|--------------------|---------|--|--|------|-----|------|-----|------|-----|----------------|-------------|-------------|-------------|-------------|-------------|-------------|------------------|--------------------|--------------------|--------------------|--------------------|--------------------|--------------------|--------------|--|--|--|--|--|--|--|----------|--|---------|--|---------|--|--|------|-----|------|-----|------|-----|----------------|-------------|-------------|-------------|-------------|-------------|-------------|------------------|--------------------|--------------------|--------------------|--------------------|--------------------|--------------------|--------------|--|--|--|--|--|--|--|---------|--|---------|--|---------|--|--|------|-----|------|-----|------|-----|----------------|-------------|-------------|-------------|-------------|-------------|-------------|------------------|--------------------|--------------------|--------------------|--------------------|--------------------|--------------------|--------------|--|--|--|--|--|--|--|----------|--|--|--|--|--|--|------|-----|--|--|--|--|----------------|-------------|-------------|--|--|--|--|------------------|--------------------|--------------------|--|--|--|--|
| Author Response  | <p>We thank the reviewer for this great point. We conducted new experiments and reported new results on downstream tasks using features extracted by pretrained VideoMol (called VideoMolFeat) in <b>Supplementary Table 25</b>. We also evaluated features extracted by ensemble fingerprints for comparison (called EnsembleFP). To be fair, we did not fine-tune VideoMol and directly input VideoMolFeat and EnsembleFP into a structurally identical multi-layer perceptron (MLP). New experimental results showed that VideoMolFeat achieved the best performance with 17.2% average RMSE improvement and 19.4% average MAE improvement compared with EnsembleFP on 10 kinases datasets. These new findings (without fine tuning) show that the features extracted by VideoMol are superior alternative compared with traditional molecular fingerprinting.</p> <table border="1"> <caption><b>Table S25:</b> The performance of molecular fingerprint on 10 kinases datasets with balanced scaffold split. EnsembleFP-MLP indicates the performance of integrating traditional molecular fingerprints in CAP and training an MLP. VideoMolFeat-MLP represents the performance of using VideoMol to extract molecular features and train an MLP.</caption> <thead> <tr> <th></th> <th colspan="2">1. 5HT1A</th> <th colspan="2">2. 5HT2A</th> <th colspan="2">3. AA1R</th> </tr> <tr> <th></th> <th>RMSE</th> <th>MAE</th> <th>RMSE</th> <th>MAE</th> <th>RMSE</th> <th>MAE</th> </tr> </thead> <tbody> <tr> <td>EnsembleFP-MLP</td> <td>1.030±0.000</td> <td>0.837±0.001</td> <td>1.207±0.005</td> <td>0.975±0.006</td> <td>0.915±0.005</td> <td>0.734±0.005</td> </tr> <tr> <td>VideoMolFeat-MLP</td> <td><b>0.818±0.031</b></td> <td><b>0.653±0.033</b></td> <td><b>0.910±0.014</b></td> <td><b>0.695±0.017</b></td> <td><b>0.838±0.007</b></td> <td><b>0.647±0.005</b></td> </tr> <tr> <td colspan="7">— continue —</td> </tr> <tr> <th></th> <th colspan="2">4. AA2AR</th> <th colspan="2">5. AA3R</th> <th colspan="2">6. CNR2</th> </tr> <tr> <th></th> <th>RMSE</th> <th>MAE</th> <th>RMSE</th> <th>MAE</th> <th>RMSE</th> <th>MAE</th> </tr> <tr> <td>EnsembleFP-MLP</td> <td>1.076±0.003</td> <td>0.871±0.002</td> <td>0.991±0.001</td> <td>0.791±0.002</td> <td>1.228±0.004</td> <td>1.027±0.002</td> </tr> <tr> <td>VideoMolFeat-MLP</td> <td><b>0.850±0.005</b></td> <td><b>0.691±0.004</b></td> <td><b>0.862±0.014</b></td> <td><b>0.695±0.012</b></td> <td><b>1.003±0.070</b></td> <td><b>0.789±0.066</b></td> </tr> <tr> <td colspan="7">— continue —</td> </tr> <tr> <th></th> <th colspan="2">7. DRD2</th> <th colspan="2">8. DRD3</th> <th colspan="2">9. HRH3</th> </tr> <tr> <th></th> <th>RMSE</th> <th>MAE</th> <th>RMSE</th> <th>MAE</th> <th>RMSE</th> <th>MAE</th> </tr> <tr> <td>EnsembleFP-MLP</td> <td>0.979±0.000</td> <td>0.785±0.001</td> <td>1.096±0.004</td> <td>0.933±0.002</td> <td>0.888±0.003</td> <td>0.681±0.002</td> </tr> <tr> <td>VideoMolFeat-MLP</td> <td><b>0.885±0.003</b></td> <td><b>0.660±0.002</b></td> <td><b>0.837±0.012</b></td> <td><b>0.663±0.011</b></td> <td><b>0.741±0.001</b></td> <td><b>0.578±0.002</b></td> </tr> <tr> <td colspan="7">— continue —</td> </tr> <tr> <th></th> <th colspan="2">10. OPRM</th> <th colspan="4"></th> </tr> <tr> <th></th> <th>RMSE</th> <th>MAE</th> <th colspan="4"></th> </tr> <tr> <td>EnsembleFP-MLP</td> <td>1.023±0.006</td> <td>0.815±0.002</td> <td colspan="4"></td> </tr> <tr> <td>VideoMolFeat-MLP</td> <td><b>0.875±0.004</b></td> <td><b>0.672±0.003</b></td> <td colspan="4"></td> </tr> </tbody> </table> |                    | 1. 5HT1A           |                    | 2. 5HT2A           |                    | 3. AA1R |  |  | RMSE | MAE | RMSE | MAE | RMSE | MAE | EnsembleFP-MLP | 1.030±0.000 | 0.837±0.001 | 1.207±0.005 | 0.975±0.006 | 0.915±0.005 | 0.734±0.005 | VideoMolFeat-MLP | <b>0.818±0.031</b> | <b>0.653±0.033</b> | <b>0.910±0.014</b> | <b>0.695±0.017</b> | <b>0.838±0.007</b> | <b>0.647±0.005</b> | — continue — |  |  |  |  |  |  |  | 4. AA2AR |  | 5. AA3R |  | 6. CNR2 |  |  | RMSE | MAE | RMSE | MAE | RMSE | MAE | EnsembleFP-MLP | 1.076±0.003 | 0.871±0.002 | 0.991±0.001 | 0.791±0.002 | 1.228±0.004 | 1.027±0.002 | VideoMolFeat-MLP | <b>0.850±0.005</b> | <b>0.691±0.004</b> | <b>0.862±0.014</b> | <b>0.695±0.012</b> | <b>1.003±0.070</b> | <b>0.789±0.066</b> | — continue — |  |  |  |  |  |  |  | 7. DRD2 |  | 8. DRD3 |  | 9. HRH3 |  |  | RMSE | MAE | RMSE | MAE | RMSE | MAE | EnsembleFP-MLP | 0.979±0.000 | 0.785±0.001 | 1.096±0.004 | 0.933±0.002 | 0.888±0.003 | 0.681±0.002 | VideoMolFeat-MLP | <b>0.885±0.003</b> | <b>0.660±0.002</b> | <b>0.837±0.012</b> | <b>0.663±0.011</b> | <b>0.741±0.001</b> | <b>0.578±0.002</b> | — continue — |  |  |  |  |  |  |  | 10. OPRM |  |  |  |  |  |  | RMSE | MAE |  |  |  |  | EnsembleFP-MLP | 1.023±0.006 | 0.815±0.002 |  |  |  |  | VideoMolFeat-MLP | <b>0.875±0.004</b> | <b>0.672±0.003</b> |  |  |  |  |
|                  | 1. 5HT1A                                                                                                                                                                                                                                                                                                                                                                                                                                                                                                                                                                                                                                                                                                                                                                                                                                                                                                                                                                                                                                                                                                                                                                                                                                                                                                                                                                                                                                                                                                                                                                                                                                                                                                                                                                                                                                                                                                                                                                                                                                                                                                                                                                                                                                                                                                                                                                                                                                                                                                                                                                                                                                                                                                                                                                                                                                                                                                                                                                                                                                                                                                                                                                                                                                                                                                                                                                                                                                                                                                                                                                                                                   |                    | 2. 5HT2A           |                    | 3. AA1R            |                    |         |  |  |      |     |      |     |      |     |                |             |             |             |             |             |             |                  |                    |                    |                    |                    |                    |                    |              |  |  |  |  |  |  |  |          |  |         |  |         |  |  |      |     |      |     |      |     |                |             |             |             |             |             |             |                  |                    |                    |                    |                    |                    |                    |              |  |  |  |  |  |  |  |         |  |         |  |         |  |  |      |     |      |     |      |     |                |             |             |             |             |             |             |                  |                    |                    |                    |                    |                    |                    |              |  |  |  |  |  |  |  |          |  |  |  |  |  |  |      |     |  |  |  |  |                |             |             |  |  |  |  |                  |                    |                    |  |  |  |  |
|                  | RMSE                                                                                                                                                                                                                                                                                                                                                                                                                                                                                                                                                                                                                                                                                                                                                                                                                                                                                                                                                                                                                                                                                                                                                                                                                                                                                                                                                                                                                                                                                                                                                                                                                                                                                                                                                                                                                                                                                                                                                                                                                                                                                                                                                                                                                                                                                                                                                                                                                                                                                                                                                                                                                                                                                                                                                                                                                                                                                                                                                                                                                                                                                                                                                                                                                                                                                                                                                                                                                                                                                                                                                                                                                       | MAE                | RMSE               | MAE                | RMSE               | MAE                |         |  |  |      |     |      |     |      |     |                |             |             |             |             |             |             |                  |                    |                    |                    |                    |                    |                    |              |  |  |  |  |  |  |  |          |  |         |  |         |  |  |      |     |      |     |      |     |                |             |             |             |             |             |             |                  |                    |                    |                    |                    |                    |                    |              |  |  |  |  |  |  |  |         |  |         |  |         |  |  |      |     |      |     |      |     |                |             |             |             |             |             |             |                  |                    |                    |                    |                    |                    |                    |              |  |  |  |  |  |  |  |          |  |  |  |  |  |  |      |     |  |  |  |  |                |             |             |  |  |  |  |                  |                    |                    |  |  |  |  |
| EnsembleFP-MLP   | 1.030±0.000                                                                                                                                                                                                                                                                                                                                                                                                                                                                                                                                                                                                                                                                                                                                                                                                                                                                                                                                                                                                                                                                                                                                                                                                                                                                                                                                                                                                                                                                                                                                                                                                                                                                                                                                                                                                                                                                                                                                                                                                                                                                                                                                                                                                                                                                                                                                                                                                                                                                                                                                                                                                                                                                                                                                                                                                                                                                                                                                                                                                                                                                                                                                                                                                                                                                                                                                                                                                                                                                                                                                                                                                                | 0.837±0.001        | 1.207±0.005        | 0.975±0.006        | 0.915±0.005        | 0.734±0.005        |         |  |  |      |     |      |     |      |     |                |             |             |             |             |             |             |                  |                    |                    |                    |                    |                    |                    |              |  |  |  |  |  |  |  |          |  |         |  |         |  |  |      |     |      |     |      |     |                |             |             |             |             |             |             |                  |                    |                    |                    |                    |                    |                    |              |  |  |  |  |  |  |  |         |  |         |  |         |  |  |      |     |      |     |      |     |                |             |             |             |             |             |             |                  |                    |                    |                    |                    |                    |                    |              |  |  |  |  |  |  |  |          |  |  |  |  |  |  |      |     |  |  |  |  |                |             |             |  |  |  |  |                  |                    |                    |  |  |  |  |
| VideoMolFeat-MLP | <b>0.818±0.031</b>                                                                                                                                                                                                                                                                                                                                                                                                                                                                                                                                                                                                                                                                                                                                                                                                                                                                                                                                                                                                                                                                                                                                                                                                                                                                                                                                                                                                                                                                                                                                                                                                                                                                                                                                                                                                                                                                                                                                                                                                                                                                                                                                                                                                                                                                                                                                                                                                                                                                                                                                                                                                                                                                                                                                                                                                                                                                                                                                                                                                                                                                                                                                                                                                                                                                                                                                                                                                                                                                                                                                                                                                         | <b>0.653±0.033</b> | <b>0.910±0.014</b> | <b>0.695±0.017</b> | <b>0.838±0.007</b> | <b>0.647±0.005</b> |         |  |  |      |     |      |     |      |     |                |             |             |             |             |             |             |                  |                    |                    |                    |                    |                    |                    |              |  |  |  |  |  |  |  |          |  |         |  |         |  |  |      |     |      |     |      |     |                |             |             |             |             |             |             |                  |                    |                    |                    |                    |                    |                    |              |  |  |  |  |  |  |  |         |  |         |  |         |  |  |      |     |      |     |      |     |                |             |             |             |             |             |             |                  |                    |                    |                    |                    |                    |                    |              |  |  |  |  |  |  |  |          |  |  |  |  |  |  |      |     |  |  |  |  |                |             |             |  |  |  |  |                  |                    |                    |  |  |  |  |
| — continue —     |                                                                                                                                                                                                                                                                                                                                                                                                                                                                                                                                                                                                                                                                                                                                                                                                                                                                                                                                                                                                                                                                                                                                                                                                                                                                                                                                                                                                                                                                                                                                                                                                                                                                                                                                                                                                                                                                                                                                                                                                                                                                                                                                                                                                                                                                                                                                                                                                                                                                                                                                                                                                                                                                                                                                                                                                                                                                                                                                                                                                                                                                                                                                                                                                                                                                                                                                                                                                                                                                                                                                                                                                                            |                    |                    |                    |                    |                    |         |  |  |      |     |      |     |      |     |                |             |             |             |             |             |             |                  |                    |                    |                    |                    |                    |                    |              |  |  |  |  |  |  |  |          |  |         |  |         |  |  |      |     |      |     |      |     |                |             |             |             |             |             |             |                  |                    |                    |                    |                    |                    |                    |              |  |  |  |  |  |  |  |         |  |         |  |         |  |  |      |     |      |     |      |     |                |             |             |             |             |             |             |                  |                    |                    |                    |                    |                    |                    |              |  |  |  |  |  |  |  |          |  |  |  |  |  |  |      |     |  |  |  |  |                |             |             |  |  |  |  |                  |                    |                    |  |  |  |  |
|                  | 4. AA2AR                                                                                                                                                                                                                                                                                                                                                                                                                                                                                                                                                                                                                                                                                                                                                                                                                                                                                                                                                                                                                                                                                                                                                                                                                                                                                                                                                                                                                                                                                                                                                                                                                                                                                                                                                                                                                                                                                                                                                                                                                                                                                                                                                                                                                                                                                                                                                                                                                                                                                                                                                                                                                                                                                                                                                                                                                                                                                                                                                                                                                                                                                                                                                                                                                                                                                                                                                                                                                                                                                                                                                                                                                   |                    | 5. AA3R            |                    | 6. CNR2            |                    |         |  |  |      |     |      |     |      |     |                |             |             |             |             |             |             |                  |                    |                    |                    |                    |                    |                    |              |  |  |  |  |  |  |  |          |  |         |  |         |  |  |      |     |      |     |      |     |                |             |             |             |             |             |             |                  |                    |                    |                    |                    |                    |                    |              |  |  |  |  |  |  |  |         |  |         |  |         |  |  |      |     |      |     |      |     |                |             |             |             |             |             |             |                  |                    |                    |                    |                    |                    |                    |              |  |  |  |  |  |  |  |          |  |  |  |  |  |  |      |     |  |  |  |  |                |             |             |  |  |  |  |                  |                    |                    |  |  |  |  |
|                  | RMSE                                                                                                                                                                                                                                                                                                                                                                                                                                                                                                                                                                                                                                                                                                                                                                                                                                                                                                                                                                                                                                                                                                                                                                                                                                                                                                                                                                                                                                                                                                                                                                                                                                                                                                                                                                                                                                                                                                                                                                                                                                                                                                                                                                                                                                                                                                                                                                                                                                                                                                                                                                                                                                                                                                                                                                                                                                                                                                                                                                                                                                                                                                                                                                                                                                                                                                                                                                                                                                                                                                                                                                                                                       | MAE                | RMSE               | MAE                | RMSE               | MAE                |         |  |  |      |     |      |     |      |     |                |             |             |             |             |             |             |                  |                    |                    |                    |                    |                    |                    |              |  |  |  |  |  |  |  |          |  |         |  |         |  |  |      |     |      |     |      |     |                |             |             |             |             |             |             |                  |                    |                    |                    |                    |                    |                    |              |  |  |  |  |  |  |  |         |  |         |  |         |  |  |      |     |      |     |      |     |                |             |             |             |             |             |             |                  |                    |                    |                    |                    |                    |                    |              |  |  |  |  |  |  |  |          |  |  |  |  |  |  |      |     |  |  |  |  |                |             |             |  |  |  |  |                  |                    |                    |  |  |  |  |
| EnsembleFP-MLP   | 1.076±0.003                                                                                                                                                                                                                                                                                                                                                                                                                                                                                                                                                                                                                                                                                                                                                                                                                                                                                                                                                                                                                                                                                                                                                                                                                                                                                                                                                                                                                                                                                                                                                                                                                                                                                                                                                                                                                                                                                                                                                                                                                                                                                                                                                                                                                                                                                                                                                                                                                                                                                                                                                                                                                                                                                                                                                                                                                                                                                                                                                                                                                                                                                                                                                                                                                                                                                                                                                                                                                                                                                                                                                                                                                | 0.871±0.002        | 0.991±0.001        | 0.791±0.002        | 1.228±0.004        | 1.027±0.002        |         |  |  |      |     |      |     |      |     |                |             |             |             |             |             |             |                  |                    |                    |                    |                    |                    |                    |              |  |  |  |  |  |  |  |          |  |         |  |         |  |  |      |     |      |     |      |     |                |             |             |             |             |             |             |                  |                    |                    |                    |                    |                    |                    |              |  |  |  |  |  |  |  |         |  |         |  |         |  |  |      |     |      |     |      |     |                |             |             |             |             |             |             |                  |                    |                    |                    |                    |                    |                    |              |  |  |  |  |  |  |  |          |  |  |  |  |  |  |      |     |  |  |  |  |                |             |             |  |  |  |  |                  |                    |                    |  |  |  |  |
| VideoMolFeat-MLP | <b>0.850±0.005</b>                                                                                                                                                                                                                                                                                                                                                                                                                                                                                                                                                                                                                                                                                                                                                                                                                                                                                                                                                                                                                                                                                                                                                                                                                                                                                                                                                                                                                                                                                                                                                                                                                                                                                                                                                                                                                                                                                                                                                                                                                                                                                                                                                                                                                                                                                                                                                                                                                                                                                                                                                                                                                                                                                                                                                                                                                                                                                                                                                                                                                                                                                                                                                                                                                                                                                                                                                                                                                                                                                                                                                                                                         | <b>0.691±0.004</b> | <b>0.862±0.014</b> | <b>0.695±0.012</b> | <b>1.003±0.070</b> | <b>0.789±0.066</b> |         |  |  |      |     |      |     |      |     |                |             |             |             |             |             |             |                  |                    |                    |                    |                    |                    |                    |              |  |  |  |  |  |  |  |          |  |         |  |         |  |  |      |     |      |     |      |     |                |             |             |             |             |             |             |                  |                    |                    |                    |                    |                    |                    |              |  |  |  |  |  |  |  |         |  |         |  |         |  |  |      |     |      |     |      |     |                |             |             |             |             |             |             |                  |                    |                    |                    |                    |                    |                    |              |  |  |  |  |  |  |  |          |  |  |  |  |  |  |      |     |  |  |  |  |                |             |             |  |  |  |  |                  |                    |                    |  |  |  |  |
| — continue —     |                                                                                                                                                                                                                                                                                                                                                                                                                                                                                                                                                                                                                                                                                                                                                                                                                                                                                                                                                                                                                                                                                                                                                                                                                                                                                                                                                                                                                                                                                                                                                                                                                                                                                                                                                                                                                                                                                                                                                                                                                                                                                                                                                                                                                                                                                                                                                                                                                                                                                                                                                                                                                                                                                                                                                                                                                                                                                                                                                                                                                                                                                                                                                                                                                                                                                                                                                                                                                                                                                                                                                                                                                            |                    |                    |                    |                    |                    |         |  |  |      |     |      |     |      |     |                |             |             |             |             |             |             |                  |                    |                    |                    |                    |                    |                    |              |  |  |  |  |  |  |  |          |  |         |  |         |  |  |      |     |      |     |      |     |                |             |             |             |             |             |             |                  |                    |                    |                    |                    |                    |                    |              |  |  |  |  |  |  |  |         |  |         |  |         |  |  |      |     |      |     |      |     |                |             |             |             |             |             |             |                  |                    |                    |                    |                    |                    |                    |              |  |  |  |  |  |  |  |          |  |  |  |  |  |  |      |     |  |  |  |  |                |             |             |  |  |  |  |                  |                    |                    |  |  |  |  |
|                  | 7. DRD2                                                                                                                                                                                                                                                                                                                                                                                                                                                                                                                                                                                                                                                                                                                                                                                                                                                                                                                                                                                                                                                                                                                                                                                                                                                                                                                                                                                                                                                                                                                                                                                                                                                                                                                                                                                                                                                                                                                                                                                                                                                                                                                                                                                                                                                                                                                                                                                                                                                                                                                                                                                                                                                                                                                                                                                                                                                                                                                                                                                                                                                                                                                                                                                                                                                                                                                                                                                                                                                                                                                                                                                                                    |                    | 8. DRD3            |                    | 9. HRH3            |                    |         |  |  |      |     |      |     |      |     |                |             |             |             |             |             |             |                  |                    |                    |                    |                    |                    |                    |              |  |  |  |  |  |  |  |          |  |         |  |         |  |  |      |     |      |     |      |     |                |             |             |             |             |             |             |                  |                    |                    |                    |                    |                    |                    |              |  |  |  |  |  |  |  |         |  |         |  |         |  |  |      |     |      |     |      |     |                |             |             |             |             |             |             |                  |                    |                    |                    |                    |                    |                    |              |  |  |  |  |  |  |  |          |  |  |  |  |  |  |      |     |  |  |  |  |                |             |             |  |  |  |  |                  |                    |                    |  |  |  |  |
|                  | RMSE                                                                                                                                                                                                                                                                                                                                                                                                                                                                                                                                                                                                                                                                                                                                                                                                                                                                                                                                                                                                                                                                                                                                                                                                                                                                                                                                                                                                                                                                                                                                                                                                                                                                                                                                                                                                                                                                                                                                                                                                                                                                                                                                                                                                                                                                                                                                                                                                                                                                                                                                                                                                                                                                                                                                                                                                                                                                                                                                                                                                                                                                                                                                                                                                                                                                                                                                                                                                                                                                                                                                                                                                                       | MAE                | RMSE               | MAE                | RMSE               | MAE                |         |  |  |      |     |      |     |      |     |                |             |             |             |             |             |             |                  |                    |                    |                    |                    |                    |                    |              |  |  |  |  |  |  |  |          |  |         |  |         |  |  |      |     |      |     |      |     |                |             |             |             |             |             |             |                  |                    |                    |                    |                    |                    |                    |              |  |  |  |  |  |  |  |         |  |         |  |         |  |  |      |     |      |     |      |     |                |             |             |             |             |             |             |                  |                    |                    |                    |                    |                    |                    |              |  |  |  |  |  |  |  |          |  |  |  |  |  |  |      |     |  |  |  |  |                |             |             |  |  |  |  |                  |                    |                    |  |  |  |  |
| EnsembleFP-MLP   | 0.979±0.000                                                                                                                                                                                                                                                                                                                                                                                                                                                                                                                                                                                                                                                                                                                                                                                                                                                                                                                                                                                                                                                                                                                                                                                                                                                                                                                                                                                                                                                                                                                                                                                                                                                                                                                                                                                                                                                                                                                                                                                                                                                                                                                                                                                                                                                                                                                                                                                                                                                                                                                                                                                                                                                                                                                                                                                                                                                                                                                                                                                                                                                                                                                                                                                                                                                                                                                                                                                                                                                                                                                                                                                                                | 0.785±0.001        | 1.096±0.004        | 0.933±0.002        | 0.888±0.003        | 0.681±0.002        |         |  |  |      |     |      |     |      |     |                |             |             |             |             |             |             |                  |                    |                    |                    |                    |                    |                    |              |  |  |  |  |  |  |  |          |  |         |  |         |  |  |      |     |      |     |      |     |                |             |             |             |             |             |             |                  |                    |                    |                    |                    |                    |                    |              |  |  |  |  |  |  |  |         |  |         |  |         |  |  |      |     |      |     |      |     |                |             |             |             |             |             |             |                  |                    |                    |                    |                    |                    |                    |              |  |  |  |  |  |  |  |          |  |  |  |  |  |  |      |     |  |  |  |  |                |             |             |  |  |  |  |                  |                    |                    |  |  |  |  |
| VideoMolFeat-MLP | <b>0.885±0.003</b>                                                                                                                                                                                                                                                                                                                                                                                                                                                                                                                                                                                                                                                                                                                                                                                                                                                                                                                                                                                                                                                                                                                                                                                                                                                                                                                                                                                                                                                                                                                                                                                                                                                                                                                                                                                                                                                                                                                                                                                                                                                                                                                                                                                                                                                                                                                                                                                                                                                                                                                                                                                                                                                                                                                                                                                                                                                                                                                                                                                                                                                                                                                                                                                                                                                                                                                                                                                                                                                                                                                                                                                                         | <b>0.660±0.002</b> | <b>0.837±0.012</b> | <b>0.663±0.011</b> | <b>0.741±0.001</b> | <b>0.578±0.002</b> |         |  |  |      |     |      |     |      |     |                |             |             |             |             |             |             |                  |                    |                    |                    |                    |                    |                    |              |  |  |  |  |  |  |  |          |  |         |  |         |  |  |      |     |      |     |      |     |                |             |             |             |             |             |             |                  |                    |                    |                    |                    |                    |                    |              |  |  |  |  |  |  |  |         |  |         |  |         |  |  |      |     |      |     |      |     |                |             |             |             |             |             |             |                  |                    |                    |                    |                    |                    |                    |              |  |  |  |  |  |  |  |          |  |  |  |  |  |  |      |     |  |  |  |  |                |             |             |  |  |  |  |                  |                    |                    |  |  |  |  |
| — continue —     |                                                                                                                                                                                                                                                                                                                                                                                                                                                                                                                                                                                                                                                                                                                                                                                                                                                                                                                                                                                                                                                                                                                                                                                                                                                                                                                                                                                                                                                                                                                                                                                                                                                                                                                                                                                                                                                                                                                                                                                                                                                                                                                                                                                                                                                                                                                                                                                                                                                                                                                                                                                                                                                                                                                                                                                                                                                                                                                                                                                                                                                                                                                                                                                                                                                                                                                                                                                                                                                                                                                                                                                                                            |                    |                    |                    |                    |                    |         |  |  |      |     |      |     |      |     |                |             |             |             |             |             |             |                  |                    |                    |                    |                    |                    |                    |              |  |  |  |  |  |  |  |          |  |         |  |         |  |  |      |     |      |     |      |     |                |             |             |             |             |             |             |                  |                    |                    |                    |                    |                    |                    |              |  |  |  |  |  |  |  |         |  |         |  |         |  |  |      |     |      |     |      |     |                |             |             |             |             |             |             |                  |                    |                    |                    |                    |                    |                    |              |  |  |  |  |  |  |  |          |  |  |  |  |  |  |      |     |  |  |  |  |                |             |             |  |  |  |  |                  |                    |                    |  |  |  |  |
|                  | 10. OPRM                                                                                                                                                                                                                                                                                                                                                                                                                                                                                                                                                                                                                                                                                                                                                                                                                                                                                                                                                                                                                                                                                                                                                                                                                                                                                                                                                                                                                                                                                                                                                                                                                                                                                                                                                                                                                                                                                                                                                                                                                                                                                                                                                                                                                                                                                                                                                                                                                                                                                                                                                                                                                                                                                                                                                                                                                                                                                                                                                                                                                                                                                                                                                                                                                                                                                                                                                                                                                                                                                                                                                                                                                   |                    |                    |                    |                    |                    |         |  |  |      |     |      |     |      |     |                |             |             |             |             |             |             |                  |                    |                    |                    |                    |                    |                    |              |  |  |  |  |  |  |  |          |  |         |  |         |  |  |      |     |      |     |      |     |                |             |             |             |             |             |             |                  |                    |                    |                    |                    |                    |                    |              |  |  |  |  |  |  |  |         |  |         |  |         |  |  |      |     |      |     |      |     |                |             |             |             |             |             |             |                  |                    |                    |                    |                    |                    |                    |              |  |  |  |  |  |  |  |          |  |  |  |  |  |  |      |     |  |  |  |  |                |             |             |  |  |  |  |                  |                    |                    |  |  |  |  |
|                  | RMSE                                                                                                                                                                                                                                                                                                                                                                                                                                                                                                                                                                                                                                                                                                                                                                                                                                                                                                                                                                                                                                                                                                                                                                                                                                                                                                                                                                                                                                                                                                                                                                                                                                                                                                                                                                                                                                                                                                                                                                                                                                                                                                                                                                                                                                                                                                                                                                                                                                                                                                                                                                                                                                                                                                                                                                                                                                                                                                                                                                                                                                                                                                                                                                                                                                                                                                                                                                                                                                                                                                                                                                                                                       | MAE                |                    |                    |                    |                    |         |  |  |      |     |      |     |      |     |                |             |             |             |             |             |             |                  |                    |                    |                    |                    |                    |                    |              |  |  |  |  |  |  |  |          |  |         |  |         |  |  |      |     |      |     |      |     |                |             |             |             |             |             |             |                  |                    |                    |                    |                    |                    |                    |              |  |  |  |  |  |  |  |         |  |         |  |         |  |  |      |     |      |     |      |     |                |             |             |             |             |             |             |                  |                    |                    |                    |                    |                    |                    |              |  |  |  |  |  |  |  |          |  |  |  |  |  |  |      |     |  |  |  |  |                |             |             |  |  |  |  |                  |                    |                    |  |  |  |  |
| EnsembleFP-MLP   | 1.023±0.006                                                                                                                                                                                                                                                                                                                                                                                                                                                                                                                                                                                                                                                                                                                                                                                                                                                                                                                                                                                                                                                                                                                                                                                                                                                                                                                                                                                                                                                                                                                                                                                                                                                                                                                                                                                                                                                                                                                                                                                                                                                                                                                                                                                                                                                                                                                                                                                                                                                                                                                                                                                                                                                                                                                                                                                                                                                                                                                                                                                                                                                                                                                                                                                                                                                                                                                                                                                                                                                                                                                                                                                                                | 0.815±0.002        |                    |                    |                    |                    |         |  |  |      |     |      |     |      |     |                |             |             |             |             |             |             |                  |                    |                    |                    |                    |                    |                    |              |  |  |  |  |  |  |  |          |  |         |  |         |  |  |      |     |      |     |      |     |                |             |             |             |             |             |             |                  |                    |                    |                    |                    |                    |                    |              |  |  |  |  |  |  |  |         |  |         |  |         |  |  |      |     |      |     |      |     |                |             |             |             |             |             |             |                  |                    |                    |                    |                    |                    |                    |              |  |  |  |  |  |  |  |          |  |  |  |  |  |  |      |     |  |  |  |  |                |             |             |  |  |  |  |                  |                    |                    |  |  |  |  |
| VideoMolFeat-MLP | <b>0.875±0.004</b>                                                                                                                                                                                                                                                                                                                                                                                                                                                                                                                                                                                                                                                                                                                                                                                                                                                                                                                                                                                                                                                                                                                                                                                                                                                                                                                                                                                                                                                                                                                                                                                                                                                                                                                                                                                                                                                                                                                                                                                                                                                                                                                                                                                                                                                                                                                                                                                                                                                                                                                                                                                                                                                                                                                                                                                                                                                                                                                                                                                                                                                                                                                                                                                                                                                                                                                                                                                                                                                                                                                                                                                                         | <b>0.672±0.003</b> |                    |                    |                    |                    |         |  |  |      |     |      |     |      |     |                |             |             |             |             |             |             |                  |                    |                    |                    |                    |                    |                    |              |  |  |  |  |  |  |  |          |  |         |  |         |  |  |      |     |      |     |      |     |                |             |             |             |             |             |             |                  |                    |                    |                    |                    |                    |                    |              |  |  |  |  |  |  |  |         |  |         |  |         |  |  |      |     |      |     |      |     |                |             |             |             |             |             |             |                  |                    |                    |                    |                    |                    |                    |              |  |  |  |  |  |  |  |          |  |  |  |  |  |  |      |     |  |  |  |  |                |             |             |  |  |  |  |                  |                    |                    |  |  |  |  |

**Ref 1.3 – “Standard error/deviation of experimental results repeated multiple times” –**

|                  |                                                                                                                                                                                                                                                                                                                                                                                           |
|------------------|-------------------------------------------------------------------------------------------------------------------------------------------------------------------------------------------------------------------------------------------------------------------------------------------------------------------------------------------------------------------------------------------|
| Reviewer Comment | Why is there no standard error/deviation for any of the results? Have the experiments been repeated multiple times? Having some indication about the uncertainty intervals around the results would be appreciated.                                                                                                                                                                       |
| Author Response  | We repeated all molecular property prediction experiments for 10 times with random seeds 0 to 9 and the remaining experiments were repeated with 3 random seeds 0 to 2. All these new standard deviations have been provided in the <b>Supplementary Tables 3-7</b> . We found that overall standard error/deviation and 95% CI are very small, indicating robustness of VideoMol models. |

**Table S3:** The ROC-AUC performance of different methods on 10 main types of biochemical kinases from KinomeScan datasets with balanced scaffold split. All compared results are obtained from ImageMol.

|                      | BTK                | CDK4-cyclinD3      | EGFR               | FGFR1              | FGFR2              |               |
|----------------------|--------------------|--------------------|--------------------|--------------------|--------------------|---------------|
| MoCLR <sub>GN</sub>  | 0.556±0.118        | 0.778±0.171        | 0.583±0.067        | 0.695±0.249        | 0.667±0.132        |               |
| MoCLR <sub>GCN</sub> | 0.602±0.129        | 0.944±0.039        | 0.750±0.051        | 0.619±0.378        | 0.667±0.052        |               |
| RNN_LR               | 0.611±0.000        | 0.667±0.000        | 0.536±0.000        | 0.771±0.000        | 0.741±0.000        |               |
| TRFM_LR              | 0.694±0.000        | 0.750±0.000        | 0.821±0.000        | 0.743±0.000        | 0.704±0.000        |               |
| RNN_MLP              | 0.556±0.023        | 0.833±0.000        | 0.536±0.029        | 0.848±0.059        | 0.716±0.046        |               |
| TRFM_MLP             | 0.537±0.013        | 0.639±0.039        | 0.667±0.061        | 0.643±0.031        | 0.741±0.000        |               |
| RNN_RF               | 0.546±0.013        | 0.917±0.000        | 0.548±0.017        | 0.476±0.027        | 0.685±0.055        |               |
| TRFM_RF              | 0.639±0.039        | 0.639±0.039        | 0.607±0.000        | 0.476±0.013        | 0.556±0.030        |               |
| CHEM-BERT            | 0.648±0.013        | 0.583±0.297        | 0.845±0.094        | 0.429±0.117        | 0.765±0.106        |               |
| ImageMol             | 0.843±0.026        | 0.917±0.068        | 0.857±0.000        | <b>0.857±0.023</b> | 0.852±0.052        |               |
| VideoMol             | <b>0.861±0.023</b> | <b>0.972±0.039</b> | <b>0.905±0.017</b> | 0.848±0.027        | <b>0.988±0.017</b> |               |
| ----- Continue ----- |                    |                    |                    |                    |                    |               |
|                      | FGFR3              | FGFR4              | FLT3               | KPCD3              | MET                | Average       |
| MoCLR <sub>GN</sub>  | 0.760±0.039        | 0.773±0.121        | 0.722±0.091        | 0.571±0.107        | 0.611±0.236        | 0.6716        |
| MoCLR <sub>GCN</sub> | 0.792±0.106        | 0.537±0.013        | 0.722±0.208        | 0.505±0.067        | 0.574±0.052        | 0.6712        |
| RNN_LR               | 0.646±0.015        | 0.528±0.000        | 0.778±0.000        | 0.457±0.000        | 0.796±0.026        | 0.6531        |
| TRFM_LR              | 0.812±0.000        | 0.639±0.000        | 0.611±0.000        | 0.438±0.027        | 0.778±0.000        | 0.6990        |
| RNN_MLP              | 0.469±0.026        | 0.269±0.035        | 0.630±0.105        | 0.410±0.036        | 0.667±0.045        | 0.5934        |
| TRFM_MLP             | 0.802±0.015        | 0.676±0.035        | 0.667±0.136        | 0.219±0.027        | 0.556±0.000        | 0.6147        |
| RNN_RF               | 0.312±0.000        | 0.389±0.000        | 0.519±0.026        | 0.343±0.000        | 0.500±0.000        | 0.5235        |
| TRFM_RF              | 0.646±0.078        | 0.602±0.013        | 0.546±0.035        | 0.262±0.058        | 0.593±0.026        | 0.5566        |
| CHEM-BERT            | 0.438±0.077        | 0.528±0.060        | 0.574±0.189        | 0.557±0.091        | 0.944±0.000        | 0.6311        |
| ImageMol             | 0.854±0.064        | 0.833±0.045        | 0.722±0.120        | 0.762±0.088        | <b>0.963±0.026</b> | 0.8460        |
| VideoMol             | <b>0.896±0.039</b> | <b>0.852±0.080</b> | <b>0.981±0.026</b> | <b>0.867±0.036</b> | <b>0.963±0.026</b> | <b>0.9133</b> |

**Table S4:** The RMSE and MAE performance of different methods on 10 GPCR with balanced scaffold split. The lower the value, the better the performance. All compared results are obtained from ImageMol.

|                      | 1. 5HT1A           |                    | 2. 5HT2A           |                    | 3. AA1R            |                    |
|----------------------|--------------------|--------------------|--------------------|--------------------|--------------------|--------------------|
|                      | RMSE               | MAE                | RMSE               | MAE                | RMSE               | MAE                |
| MoCLR <sub>GN</sub>  | 0.850±0.021        | 0.670±0.012        | 0.853±0.019        | 0.642±0.014        | 0.786±0.015        | 0.588±0.009        |
| MoCLR <sub>GCN</sub> | 0.949±0.027        | 0.764±0.014        | 0.875±0.008        | 0.681±0.024        | 0.856±0.026        | 0.662±0.026        |
| RNN_LR               | 1.574±0.091        | 0.937±0.019        | 1.602±0.245        | 1.103±0.151        | 1.073±0.087        | 0.762±0.057        |
| TRFM_LR              | 1.636±0.004        | 1.109±0.001        | 1.389±0.000        | 0.999±0.001        | 1.060±0.003        | 0.810±0.001        |
| RNN_MLP              | 0.957±0.013        | 0.768±0.010        | 1.167±0.010        | 0.890±0.003        | 0.848±0.004        | 0.662±0.008        |
| TRFM_MLP             | 0.939±0.034        | 0.730±0.025        | 1.013±0.026        | 0.728±0.021        | 0.878±0.051        | 0.657±0.031        |
| RNN_RF               | 0.788±0.004        | 0.617±0.004        | 1.001±0.001        | 0.747±0.001        | 0.717±0.003        | 0.554±0.002        |
| TRFM_RF              | 0.855±0.001        | 0.672±0.001        | 1.011±0.002        | 0.777±0.002        | 0.740±0.001        | 0.568±0.001        |
| CHEM-BERT            | 0.876±0.018        | 0.706±0.012        | 0.909±0.057        | 0.682±0.056        | 0.734±0.038        | 0.544±0.027        |
| ImageMol             | 0.776±0.012        | 0.620±0.014        | 0.780±0.017        | 0.578±0.022        | 0.711±0.012        | 0.554±0.009        |
| VideoMol             | <b>0.708±0.017</b> | <b>0.547±0.015</b> | <b>0.775±0.017</b> | <b>0.577±0.009</b> | <b>0.655±0.007</b> | <b>0.496±0.006</b> |
|                      | 4. AA2AR           |                    | 5. AA3R            |                    | 6. CNR2            |                    |
|                      | RMSE               | MAE                | RMSE               | MAE                | RMSE               | MAE                |
| MoCLR <sub>GN</sub>  | 0.748±0.012        | 0.588±0.008        | 0.840±0.014        | 0.692±0.010        | 0.926±0.047        | 0.758±0.036        |
| MoCLR <sub>GCN</sub> | 0.819±0.011        | 0.651±0.008        | 0.855±0.010        | 0.700±0.011        | 0.978±0.023        | 0.803±0.021        |
| RNN_LR               | 1.801±0.600        | 1.193±0.335        | 2.295±0.463        | 1.190±0.155        | 5.505±0.093        | 1.611±0.032        |
| TRFM_LR              | 1.130±0.000        | 0.906±0.000        | 1.155±0.001        | 0.919±0.001        | 1.700±0.001        | 1.213±0.000        |
| RNN_MLP              | 0.967±0.002        | 0.773±0.005        | 0.883±0.010        | 0.707±0.012        | 1.091±0.015        | 0.881±0.013        |
| TRFM_MLP             | 0.948±0.013        | 0.744±0.005        | 0.945±0.010        | 0.749±0.014        | 1.144±0.055        | 0.903±0.038        |
| RNN_RF               | 0.887±0.002        | 0.692±0.001        | 0.796±0.009        | 0.624±0.007        | 0.965±0.002        | 0.766±0.001        |
| TRFM_RF              | 0.926±0.003        | 0.735±0.004        | 0.856±0.001        | 0.701±0.002        | 0.965±0.002        | 0.800±0.002        |
| CHEM-BERT            | 0.862±0.071        | 0.674±0.058        | 0.861±0.058        | 0.684±0.047        | 0.925±0.051        | 0.727±0.041        |
| ImageMol             | 0.734±0.015        | 0.573±0.009        | 0.793±0.008        | 0.634±0.001        | 0.905±0.004        | 0.717±0.015        |
| VideoMol             | <b>0.712±0.011</b> | <b>0.543±0.005</b> | <b>0.786±0.006</b> | <b>0.617±0.004</b> | <b>0.864±0.005</b> | <b>0.679±0.010</b> |
|                      | 7. DRD2            |                    | 8. DRD3            |                    | 9. HRH3            |                    |
|                      | RMSE               | MAE                | RMSE               | MAE                | RMSE               | MAE                |
| MoCLR <sub>GN</sub>  | 0.814±0.009        | 0.591±0.007        | 0.858±0.017        | 0.673±0.022        | 0.734±0.006        | 0.581±0.004        |
| MoCLR <sub>GCN</sub> | 0.855±0.022        | 0.634±0.017        | 0.914±0.024        | 0.725±0.025        | 0.740±0.016        | 0.576±0.006        |
| RNN_LR               | 1.142±0.077        | 0.839±0.038        | 1.316±0.011        | 0.942±0.005        | 1.616±0.236        | 0.943±0.070        |
| TRFM_LR              | 1.000±0.000        | 0.719±0.000        | 1.219±0.000        | 0.914±0.000        | 1.169±0.002        | 0.911±0.002        |
| RNN_MLP              | 0.895±0.006        | 0.694±0.005        | 1.021±0.007        | 0.819±0.007        | 0.871±0.015        | 0.702±0.011        |
| TRFM_MLP             | 0.919±0.016        | 0.686±0.016        | 1.012±0.041        | 0.790±0.023        | 0.863±0.011        | 0.676±0.009        |
| RNN_RF               | 0.837±0.001        | 0.612±0.001        | 0.861±0.001        | 0.685±0.001        | 0.771±0.002        | 0.613±0.002        |
| TRFM_RF              | 0.864±0.001        | 0.636±0.002        | 0.904±0.001        | 0.717±0.001        | 0.770±0.002        | 0.602±0.001        |
| CHEM-BERT            | 0.816±0.011        | 0.587±0.013        | 0.803±0.029        | 0.631±0.026        | 0.770±0.033        | 0.594±0.022        |
| ImageMol             | 0.772±0.014        | 0.573±0.009        | 0.735±0.018        | 0.576±0.014        | 0.710±0.006        | 0.561±0.006        |
| VideoMol             | <b>0.742±0.004</b> | <b>0.556±0.005</b> | <b>0.715±0.014</b> | <b>0.554±0.012</b> | <b>0.668±0.008</b> | <b>0.506±0.002</b> |
|                      | 10. OPRM           |                    |                    |                    |                    |                    |
|                      | RMSE               | MAE                |                    |                    |                    |                    |
| MoCLR <sub>GN</sub>  | 0.856±0.008        | 0.664±0.016        |                    |                    |                    |                    |
| MoCLR <sub>GCN</sub> | 0.853±0.009        | 0.653±0.020        |                    |                    |                    |                    |
| RNN_LR               | 2.649±1.024        | 1.744±0.614        |                    |                    |                    |                    |
| TRFM_LR              | 1.694±0.001        | 1.282±0.000        |                    |                    |                    |                    |
| RNN_MLP              | 1.022±0.014        | 0.781±0.008        |                    |                    |                    |                    |
| TRFM_MLP             | 1.084±0.009        | 0.849±0.007        |                    |                    |                    |                    |
| RNN_RF               | 0.876±0.010        | 0.671±0.009        |                    |                    |                    |                    |
| TRFM_RF              | 0.852±0.002        | 0.660±0.003        |                    |                    |                    |                    |
| CHEM-BERT            | 0.893±0.024        | 0.672±0.019        |                    |                    |                    |                    |
| ImageMol             | 0.849±0.018        | 0.645±0.015        |                    |                    |                    |                    |
| VideoMol             | <b>0.795±0.015</b> | <b>0.579±0.011</b> |                    |                    |                    |                    |



**Table S5:** The ROC-AUC performance (%) of different methods on 6 molecular property prediction benchmarks with scaffold split. All experiments are run 10 times using random seeds from 0 to 9. GraphMVP-C, Mole-BERT, Uni-Mol and ImageMol are reproduced from their source code and other results from Mole-BERT.

|                   | Tox21             | ToxCast           | Sider             | HIV               | BBBP              | BACE              |
|-------------------|-------------------|-------------------|-------------------|-------------------|-------------------|-------------------|
| #Molecules        | 7831              | 8576              | 1427              | 41127             | 2039              | 1513              |
| #Task             | 12                | 617               | 27                | 1                 | 1                 | 1                 |
| InfoGraph         | 73.3 (0.6)        | 61.8 (0.4)        | 58.7 (0.6)        | 74.2 (0.9)        | 68.7 (0.6)        | 74.3 (2.6)        |
| GPT-GNN           | 74.9 (0.3)        | 62.5 (0.4)        | 58.1 (0.3)        | 65.2 (2.1)        | 64.5 (1.4)        | 77.9 (3.2)        |
| ContextPred       | 73.6 (0.3)        | 62.6 (0.6)        | 59.7 (1.8)        | 75.6 (1.0)        | 70.6 (1.5)        | 78.8 (1.2)        |
| GraphLoG          | 75.0 (0.6)        | 63.4 (0.6)        | 59.6 (1.9)        | 76.1 (0.8)        | 68.7 (1.6)        | 78.6 (1.0)        |
| G-Contextual      | 75.0 (0.6)        | 62.8 (0.7)        | 58.7 (1.0)        | 76.3 (1.5)        | 69.9 (2.1)        | 79.3 (1.1)        |
| G-Motif           | 73.6 (0.7)        | 62.3 (0.6)        | 61.0 (1.5)        | 73.8 (1.2)        | 66.9 (3.1)        | 73.0 (3.3)        |
| AD-GCL            | 74.9 (0.4)        | 63.4 (0.7)        | 61.5 (0.9)        | 76.7 (1.2)        | 70.7 (0.3)        | 76.6 (1.5)        |
| JOAO              | 74.8 (0.6)        | 62.8 (0.7)        | 60.4 (1.5)        | 76.9 (0.7)        | 66.4 (1.0)        | 73.2 (1.6)        |
| SimGRACE          | 74.4 (0.3)        | 62.6 (0.7)        | 60.2 (0.9)        | 75.0 (0.6)        | <b>71.2 (1.1)</b> | 74.9 (2.0)        |
| GraphCL           | 75.1 (0.7)        | 63.0 (0.4)        | 59.8 (1.3)        | 75.1 (0.7)        | 67.8 (2.4)        | 74.6 (2.1)        |
| GraphMAE          | 75.2 (0.9)        | 63.6 (0.3)        | 60.5 (1.2)        | 76.8 (0.6)        | <b>71.2 (1.0)</b> | 78.2 (1.5)        |
| 3D InfoMax        | 74.5 (0.7)        | 63.5 (0.8)        | 56.8 (2.1)        | 76.1 (1.3)        | 69.1 (1.2)        | 78.6 (1.9)        |
| MGSSL             | 75.2 (0.6)        | 63.3 (0.5)        | 61.6 (1.0)        | 75.8 (0.4)        | 68.8 (0.6)        | 78.8 (0.9)        |
| AttrMask          | 75.1 (0.9)        | 63.3 (0.6)        | 60.5 (0.9)        | 75.3 (1.5)        | 65.2 (1.4)        | 77.8 (1.8)        |
| MolCLR            | 75.5 (0.5)        | 63.9 (0.5)        | 60.3 (1.3)        | 74.4 (1.3)        | 66.8 (3.4)        | 75.3 (2.9)        |
| GraphMVP-C        | 74.6 (0.4)        | 63.4 (0.6)        | 60.6 (1.3)        | 77.1 (2.1)        | 69.9 (1.4)        | 79.6 (1.7)        |
| ImageMol          | 75.5 (1.0)        | 65.6 (0.9)        | 64.9 (1.3)        | 76.8 (1.3)        | 70.5 (1.3)        | 78.1 (3.5)        |
| Uni-Mol (1 conf)  | 78.3 (0.4)        | 68.7 (0.5)        | 63.7 (1.3)        | 79.2 (1.0)        | 69.6 (2.0)        | 81.0 (3.9)        |
| Uni-Mol (10 conf) | <b>78.8 (0.7)</b> | <b>69.0 (0.5)</b> | 63.6 (1.4)        | 79.2 (0.9)        | 69.9 (2.7)        | 81.7 (3.4)        |
| Mole-BERT         | 77.0 (0.3)        | 64.4 (0.2)        | 63.2 (0.7)        | 77.7 (0.7)        | 65.7 (2.3)        | 80.2 (0.9)        |
| VideoMol          | <b>78.8 (0.5)</b> | <b>66.7 (0.5)</b> | <b>66.3 (0.9)</b> | <b>79.4 (0.5)</b> | <b>70.7 (2.2)</b> | <b>82.4 (0.9)</b> |
| Rank              | 1                 | 2                 | 1                 | 1                 | 3                 | 1                 |

**Table S6:** The RMSE or MAE performance of different methods on 6 molecular property prediction benchmarks with scaffold split. All experiments are run 10 times using random seeds from 0 to 9. We report RMSE for FreeSolv, ESOL and Lipo datasets and MAE for QM7 and QM8, QM9 datasets, respectively. We reproduced all comparison methods using the same settings. We use GIN backbone for MolCLR because it achieves the best results..

|            | FreeSolv           | ESOL               | Lipo               | QM7                 | QM8                    | QM9                    |
|------------|--------------------|--------------------|--------------------|---------------------|------------------------|------------------------|
| GraphMVP   | 2.559±0.158        | 1.322±0.062        | 0.773±0.016        | 120.344±6.237       | 0.02049±0.00032        | <b>0.00891±0.00010</b> |
| EdgePred   | 2.843±0.091        | 1.367±0.041        | 0.778±0.013        | 104.387±3.292       | 0.02058±0.00061        | 0.00929±0.00009        |
| GraphMVP-C | 2.766±0.199        | 1.333±0.055        | 0.768±0.013        | 121.022±5.699       | 0.02022±0.00047        | <b>0.00896±0.00011</b> |
| MolCLR     | 3.112±0.638        | 1.462±0.068        | 0.799±0.018        | 144.426±6.591       | 0.03598±0.00085        | 0.01488±0.00020        |
| ImageMol   | 2.113±0.235        | 0.964±0.067        | <b>0.702±0.060</b> | 116.384±8.445       | 0.02419±0.00033        | 0.02061±0.00019        |
| Mole-BERT  | 2.988±0.155        | 1.115±0.017        | 0.727±0.006        | 101.922±2.331       | 0.02073±0.00033        | 0.00910±0.00010        |
| VideoMol   | <b>1.728±0.053</b> | <b>0.866±0.017</b> | 0.743±0.009        | <b>76.736±1.561</b> | <b>0.01890±0.00020</b> | <b>0.00896±0.00003</b> |

**Table S7:** The ROC-AUC performance of different methods on 11 SARS-CoV-2 datasets with balanced scaffold split. All compared results are obtained from ImageMol.

|                      | 3CL                | ACE2               | hCYTOX             | MERS-PPE_cs        | MERS-PPE           | CoV1-PPE_cs        |
|----------------------|--------------------|--------------------|--------------------|--------------------|--------------------|--------------------|
| REDIAL-2020          | 0.713              | 0.753              | 0.710              | 0.703              | 0.696              | 0.661              |
| ImageMol             | <b>0.762±0.007</b> | 0.720±0.001        | 0.727±0.009        | 0.771±0.009        | 0.773±0.011        | 0.775±0.005        |
| VideoMol             | 0.709±0.006        | <b>0.759±0.025</b> | <b>0.765±0.003</b> | <b>0.828±0.027</b> | <b>0.814±0.004</b> | <b>0.836±0.029</b> |
| ===== continue ===== |                    |                    |                    |                    |                    |                    |
|                      | CoV1-PPE           | CPE                | Cytotox            | AlphaLISA          | TruHit             | Mean               |
| REDIAL-2020          | 0.665              | 0.651              | 0.688              | 0.79               | 0.734              | 0.706              |
| ImageMol             | 0.703±0.008        | 0.669±0.011        | 0.728±0.001        | 0.793±0.007        | 0.806±0.006        | 0.748              |
| VideoMol             | <b>0.737±0.007</b> | <b>0.747±0.013</b> | <b>0.761±0.002</b> | <b>0.841±0.004</b> | <b>0.862±0.002</b> | <b>0.787</b>       |

Furthermore, we calculated the uncertainty intervals with 95% confidence intervals (CI) of ImageMol and VideoMol on 10 compound-kinase interaction datasets and 11 SARS-CoV-2 viral activity prediction datasets. In details, we used the popular bias-corrected and accelerated (BCa) bootstrap intervals [1][2] to calculate 95% uncertainty intervals, which corrects for both

bias and skewness of the bootstrap parameter estimates by incorporating a bias-correction factor and an acceleration factor. The results of the uncertainty interval are reported in the Extended Table 1 (the Revised Supplemental Table 8) and Extended Table 2 (the Revised Supplemental Table 9) below, which shows the effectiveness of VideoMol with an average improvement ranging from 5.44% to 10.07%.

In summary, these new experiments highlight the robustness of our VideoMol models. We have added these new experiments and more detailed explanations in the revised manuscript.

**Extended Table 1** (the Revised Supplemental Table 8). The uncertainty intervals with 95% confidence intervals of ImageMol and VideoMol on 10 compound-kinase interaction datasets. UI(·) represents the uncertainty intervals and “Improvement” represents the relative performance improvement of VideoMol compared to ImageMol.

| Dataset | UI(RMSE)    |                    |               | UI(MAE)     |                    |               |
|---------|-------------|--------------------|---------------|-------------|--------------------|---------------|
|         | ImageMol    | VideoMol           | Improvement   | ImageMol    | VideoMol           | Improvement   |
| 5HT1A   | 0.782±0.057 | <b>0.719±0.059</b> | <b>8.06%</b>  | 0.629±0.048 | <b>0.550±0.046</b> | <b>12.56%</b> |
| 5HT2A   | 0.816±0.109 | <b>0.810±0.102</b> | <b>0.74%</b>  | 0.587±0.059 | <b>0.583±0.059</b> | <b>0.68%</b>  |
| AA1R    | 0.718±0.062 | <b>0.662±0.068</b> | <b>7.80%</b>  | 0.559±0.045 | <b>0.499±0.046</b> | <b>10.73%</b> |
| AA2AR   | 0.739±0.055 | <b>0.714±0.056</b> | <b>3.38%</b>  | 0.575±0.045 | <b>0.544±0.045</b> | <b>5.39%</b>  |
| AA3R    | 0.796±0.056 | <b>0.795±0.065</b> | <b>0.13%</b>  | 0.632±0.051 | <b>0.622±0.053</b> | <b>1.58%</b>  |
| CNR2    | 0.916±0.073 | <b>0.878±0.072</b> | <b>4.15%</b>  | 0.722±0.060 | <b>0.686±0.064</b> | <b>4.99%</b>  |
| DRD2    | 0.779±0.060 | <b>0.749±0.053</b> | <b>3.85%</b>  | 0.574±0.041 | <b>0.559±0.040</b> | <b>2.61%</b>  |
| DRD3    | 0.738±0.053 | <b>0.704±0.054</b> | <b>4.61%</b>  | 0.580±0.044 | <b>0.548±0.042</b> | <b>5.52%</b>  |
| HRH3    | 0.747±0.067 | <b>0.669±0.061</b> | <b>10.44%</b> | 0.582±0.050 | <b>0.507±0.047</b> | <b>12.89%</b> |
| OPRM    | 0.898±0.089 | <b>0.797±0.075</b> | <b>11.25%</b> | 0.667±0.065 | <b>0.584±0.062</b> | <b>12.44%</b> |

**Extended Table 2** (the Revised Supplemental Table 9). The uncertainty intervals with 95% confidence intervals of ImageMol and VideoMol on 11 SARS-CoV-2 viral activity prediction datasets. UI(·) represents the uncertainty intervals and “Improvement” represents the relative performance improvement of VideoMol compared to ImageMol.

| Dataset     | UI(AUC)     |                    |               |
|-------------|-------------|--------------------|---------------|
|             | ImageMol    | VideoMol           | Improvement   |
| 3CL         | 0.685±0.117 | <b>0.710±0.110</b> | <b>3.65%</b>  |
| ACE2        | 0.658±0.133 | <b>0.763±0.112</b> | <b>15.96%</b> |
| hCYTOX      | 0.736±0.087 | <b>0.760±0.087</b> | <b>3.26%</b>  |
| MERS-PPE_cs | 0.727±0.119 | <b>0.817±0.103</b> | <b>12.38%</b> |
| MERS-PPE    | 0.720±0.082 | <b>0.799±0.074</b> | <b>10.97%</b> |
| CoV1-PPE_cs | 0.688±0.115 | <b>0.832±0.098</b> | <b>20.93%</b> |
| CoV1-PPE    | 0.701±0.063 | <b>0.736±0.060</b> | <b>4.99%</b>  |
| CPE         | 0.646±0.084 | <b>0.736±0.077</b> | <b>13.93%</b> |
| Cytotox     | 0.729±0.051 | <b>0.760±0.054</b> | <b>4.25%</b>  |

|                                 |                                                                                                                                                                                                                                                                                                                                                                                                                                                                                                                                                                                                                                                                                                                                                                                                                                                                                                                                                                                                                                                                                                                                                                                                                                                                                                                                                                                                                                                                                                                                                                                                                                                                                                                                                                                                                                                                                                                                                                                                                                                                                                                                                                                                                                                                                                                                                                                                                                                                                                                                                                                                                                                                                                                                                                                                                                |                    |               |                    |              |        |             |                    |               |  |
|---------------------------------|--------------------------------------------------------------------------------------------------------------------------------------------------------------------------------------------------------------------------------------------------------------------------------------------------------------------------------------------------------------------------------------------------------------------------------------------------------------------------------------------------------------------------------------------------------------------------------------------------------------------------------------------------------------------------------------------------------------------------------------------------------------------------------------------------------------------------------------------------------------------------------------------------------------------------------------------------------------------------------------------------------------------------------------------------------------------------------------------------------------------------------------------------------------------------------------------------------------------------------------------------------------------------------------------------------------------------------------------------------------------------------------------------------------------------------------------------------------------------------------------------------------------------------------------------------------------------------------------------------------------------------------------------------------------------------------------------------------------------------------------------------------------------------------------------------------------------------------------------------------------------------------------------------------------------------------------------------------------------------------------------------------------------------------------------------------------------------------------------------------------------------------------------------------------------------------------------------------------------------------------------------------------------------------------------------------------------------------------------------------------------------------------------------------------------------------------------------------------------------------------------------------------------------------------------------------------------------------------------------------------------------------------------------------------------------------------------------------------------------------------------------------------------------------------------------------------------------|--------------------|---------------|--------------------|--------------|--------|-------------|--------------------|---------------|--|
|                                 | <table border="1"> <tr> <td>AlphaLISA</td> <td>0.762±0.062</td> <td><b>0.836±0.049</b></td> <td><b>9.71%</b></td> </tr> <tr> <td>TruHit</td> <td>0.772±0.059</td> <td><b>0.855±0.046</b></td> <td><b>10.75%</b></td> </tr> </table>                                                                                                                                                                                                                                                                                                                                                                                                                                                                                                                                                                                                                                                                                                                                                                                                                                                                                                                                                                                                                                                                                                                                                                                                                                                                                                                                                                                                                                                                                                                                                                                                                                                                                                                                                                                                                                                                                                                                                                                                                                                                                                                                                                                                                                                                                                                                                                                                                                                                                                                                                                                            | AlphaLISA          | 0.762±0.062   | <b>0.836±0.049</b> | <b>9.71%</b> | TruHit | 0.772±0.059 | <b>0.855±0.046</b> | <b>10.75%</b> |  |
| AlphaLISA                       | 0.762±0.062                                                                                                                                                                                                                                                                                                                                                                                                                                                                                                                                                                                                                                                                                                                                                                                                                                                                                                                                                                                                                                                                                                                                                                                                                                                                                                                                                                                                                                                                                                                                                                                                                                                                                                                                                                                                                                                                                                                                                                                                                                                                                                                                                                                                                                                                                                                                                                                                                                                                                                                                                                                                                                                                                                                                                                                                                    | <b>0.836±0.049</b> | <b>9.71%</b>  |                    |              |        |             |                    |               |  |
| TruHit                          | 0.772±0.059                                                                                                                                                                                                                                                                                                                                                                                                                                                                                                                                                                                                                                                                                                                                                                                                                                                                                                                                                                                                                                                                                                                                                                                                                                                                                                                                                                                                                                                                                                                                                                                                                                                                                                                                                                                                                                                                                                                                                                                                                                                                                                                                                                                                                                                                                                                                                                                                                                                                                                                                                                                                                                                                                                                                                                                                                    | <b>0.855±0.046</b> | <b>10.75%</b> |                    |              |        |             |                    |               |  |
| Excerpt from Revised Manuscript | <p>References<br/> [1] Efron B. Better bootstrap confidence intervals[J]. <i>Journal of the American statistical Association</i>, 1987, 82(397): 171-185.<br/> [2] Efron B, Tibshirani R J. An introduction to the bootstrap[M]. Chapman and Hall/CRC, 1994.</p> <p>For 10 compound-kinase interaction datasets, VideoMol achieves better AUC performance than other methods across BTK (AUC=0.861±0.023), CDK4-cyclinD3 (AUC=0.972±0.039), EGFR (AUC=0.905±0.017), FGFR1 (AUC=0.848±0.027), FGFR2 (AUC=0.988±0.017), FGFR3 (AUC=0.896±0.039), FGFR4 (AUC=0.852±0.080), FLT3 (AUC=0.981±0.026), KPCD3 (AUC=0.867±0.036) and MET (AUC=0.963±0.026) with an average performance improvement of 5.9% ranging from 1.8% to 20.3% (<b>Fig. 2a</b> and Supplementary Table 3). In particular, VideoMol outperforms the state-of-the-art methods of ImageMol and MolCLR with average improvements of 6.7% and 20.6%.</p> <p>In classification task, using the area under the receiver operating characteristic (ROC) curve (AUC), VideoMol achieves elevated performance across BBBP (AUC=70.7%±1.5), Tox21 (AUC=78.8%±0.4), HIV (AUC=79.4%±0.5), BACE (AUC=82.4%±0.9), SIDER (AUC=66.3%±0.9), ToxCast (AUC=66.7%±0.5), outperforming other methods (<b>Fig. 2c</b> and Supplementary Table 5). In regression task, VideoMol achieves low error values across FreeSolv (RMSE=1.728±0.053), ESOL (RMSE=0.866±0.017), Lipo (RMSE=0.743±0.009), QM7 (MAE=76.736±1.561), QM8 (MAE=0.01890±0.0020) and QM9 (MAE=0.00896±0.00003), outperforming other methods (<b>Fig. 2d</b> and Supplementary Table 6).</p> <p>We found that VideoMol achieved elevated ROC-AUC performance (3CL=0.709±0.006, ACE2=0.759±0.020, hCYTOX=0.765±0.003, MERS-PPE_cs=0.828±0.027, MERS-PPE=0.814±0.004, CPE=0.747±0.013, CoV1-PPE_cs=0.836±0.029, CoV1-PPE=0.737±0.007, Cytotox=0.761±0.002, AlphaLISA=0.841±0.004, TruHit=0.862±0.002) with an average 3.9% improvement ranging from 3.3% to 7.8% compared with ImageMol and an average 8.1% improvement ranging from 0.6% to 17.5% compared with REDIAL-2020 (<b>Fig. 2e</b> and Supplementary Table 7).</p> <p>Furthermore, we calculated the uncertainty intervals with 95% confidence intervals (CI) of ImageMol and VideoMol using 10 compound-kinase interaction datasets and 11 SARS-CoV-2 viral activity prediction datasets. In details, we used the popular bias-corrected and accelerated (BCa) bootstrap intervals<sup>41,42</sup> to calculate the uncertainty intervals with 95% confidence intervals (CI), which corrects for both bias and skewness of the bootstrap parameter estimated by incorporating a bias-correction factor and an acceleration factor. The results of the uncertainty interval show the effectiveness of VideoMol with an average improvement ranging from 5.44%</p> |                    |               |                    |              |        |             |                    |               |  |

|  |                                                                                                                                                                                                                                                                                                              |
|--|--------------------------------------------------------------------------------------------------------------------------------------------------------------------------------------------------------------------------------------------------------------------------------------------------------------|
|  | <p>to 10.07% (Supplementary Tables 8-9).</p> <p>References</p> <p>[41] Efron, B. Better bootstrap confidence intervals. Journal of the American statistical Association 82, 171-185 (1987).</p> <p>[42] Efron, B. &amp; Tibshirani, R.J. An introduction to the bootstrap. (Chapman and Hall/CRC, 1994).</p> |
|--|--------------------------------------------------------------------------------------------------------------------------------------------------------------------------------------------------------------------------------------------------------------------------------------------------------------|

#### Ref 1.4 – “Intuition on why videos make more sense and contribute to learning better features” –

| Reviewer Comment                                                                                                                                                                    | It will help if the authors include some intuition on why videos make more sense and contribute to learning better features. It is not so easy to understand for readers that are less experienced with conformers. Some running/motivating examples could help the presentation.                                                                                                                                                                                                                                                                                                                                                                                                                                                                                                                                                                                                                                                                                                                                                                                                                                                                                                                                                                                                                                                                                                                                                                                                                                                                                                                                                                                                                                                                                                                                                                                                                                                                                                                                                                                                                                                                   |                                                                                                                                                                                     |                |              |  |  |  |          |       |                |      |             |          |     |   |        |     |   |        |          |      |   |        |      |   |        |             |                     |          |   |        |              |          |   |        |              |          |   |       |               |     |   |              |
|-------------------------------------------------------------------------------------------------------------------------------------------------------------------------------------|-----------------------------------------------------------------------------------------------------------------------------------------------------------------------------------------------------------------------------------------------------------------------------------------------------------------------------------------------------------------------------------------------------------------------------------------------------------------------------------------------------------------------------------------------------------------------------------------------------------------------------------------------------------------------------------------------------------------------------------------------------------------------------------------------------------------------------------------------------------------------------------------------------------------------------------------------------------------------------------------------------------------------------------------------------------------------------------------------------------------------------------------------------------------------------------------------------------------------------------------------------------------------------------------------------------------------------------------------------------------------------------------------------------------------------------------------------------------------------------------------------------------------------------------------------------------------------------------------------------------------------------------------------------------------------------------------------------------------------------------------------------------------------------------------------------------------------------------------------------------------------------------------------------------------------------------------------------------------------------------------------------------------------------------------------------------------------------------------------------------------------------------------------|-------------------------------------------------------------------------------------------------------------------------------------------------------------------------------------|----------------|--------------|--|--|--|----------|-------|----------------|------|-------------|----------|-----|---|--------|-----|---|--------|----------|------|---|--------|------|---|--------|-------------|---------------------|----------|---|--------|--------------|----------|---|--------|--------------|----------|---|-------|---------------|-----|---|--------------|
| Author Response                                                                                                                                                                     | We thank the reviewer for this great point and we have added more intuition and examples on why videos make more sense and contribute to learning better features in the revised Results and Discussion.                                                                                                                                                                                                                                                                                                                                                                                                                                                                                                                                                                                                                                                                                                                                                                                                                                                                                                                                                                                                                                                                                                                                                                                                                                                                                                                                                                                                                                                                                                                                                                                                                                                                                                                                                                                                                                                                                                                                            |                                                                                                                                                                                     |                |              |  |  |  |          |       |                |      |             |          |     |   |        |     |   |        |          |      |   |        |      |   |        |             |                     |          |   |        |              |          |   |        |              |          |   |       |               |     |   |              |
| Excerpt from Revised Manuscript                                                                                                                                                     | <p>Results:</p> <p><b>Framework of VideoMol</b></p> <p>Molecules exist in nature and are constantly conformational dynamics, making video the most direct representation method. The molecular 3D information can be directly observed from the video without the help of manual feature extraction, such as the distance between pairs of atoms and the angle formed between multiple atoms and so on. In addition, we evaluated the advantages of different representations in feature extraction capabilities and found that our proposed video representation has obvious advantages over existing representations with a 66% improvement rate on 8 basic attributes (Supplementary Methods and Supplementary Table 1). Therefore, these significant differences motivate us to develop VideoMol for accurately predicting the targets and properties of molecules in the form of videos derived from molecules.</p> <table border="1"> <thead> <tr> <th colspan="5">Table S1: The RMSE results of different molecular representations on 8 basic attributes (molecular weight, MolLogP, MolMR, BalabanJ, NumHAcceptors, NumHDons, NumValenceElectrons).</th> </tr> <tr> <th></th> <th>modality</th> <th>model</th> <th>use conformer?</th> <th>prop</th> </tr> </thead> <tbody> <tr> <td rowspan="4">graph-based</td> <td rowspan="2">2D graph</td> <td>GCN</td> <td>x</td> <td>62.304</td> </tr> <tr> <td>GIN</td> <td>x</td> <td>62.980</td> </tr> <tr> <td rowspan="2">3D graph</td> <td>EGNN</td> <td>x</td> <td>17.418</td> </tr> <tr> <td>EGNN</td> <td>√</td> <td>16.684</td> </tr> <tr> <td rowspan="4">image-based</td> <td>image from imagemol</td> <td>ResNet18</td> <td>x</td> <td>12.469</td> </tr> <tr> <td>video-1frame</td> <td>ResNet18</td> <td>√</td> <td>11.237</td> </tr> <tr> <td>video-5frame</td> <td>ResNet18</td> <td>√</td> <td>8.088</td> </tr> <tr> <td>video-60frame</td> <td>VIT</td> <td>√</td> <td><b>7.511</b></td> </tr> </tbody> </table> <p><b>C.2 Results of different representations on 8 basic attributes</b></p> <p>To fairly compare the effects of different representations, we evaluated the</p> | Table S1: The RMSE results of different molecular representations on 8 basic attributes (molecular weight, MolLogP, MolMR, BalabanJ, NumHAcceptors, NumHDons, NumValenceElectrons). |                |              |  |  |  | modality | model | use conformer? | prop | graph-based | 2D graph | GCN | x | 62.304 | GIN | x | 62.980 | 3D graph | EGNN | x | 17.418 | EGNN | √ | 16.684 | image-based | image from imagemol | ResNet18 | x | 12.469 | video-1frame | ResNet18 | √ | 11.237 | video-5frame | ResNet18 | √ | 8.088 | video-60frame | VIT | √ | <b>7.511</b> |
| Table S1: The RMSE results of different molecular representations on 8 basic attributes (molecular weight, MolLogP, MolMR, BalabanJ, NumHAcceptors, NumHDons, NumValenceElectrons). |                                                                                                                                                                                                                                                                                                                                                                                                                                                                                                                                                                                                                                                                                                                                                                                                                                                                                                                                                                                                                                                                                                                                                                                                                                                                                                                                                                                                                                                                                                                                                                                                                                                                                                                                                                                                                                                                                                                                                                                                                                                                                                                                                     |                                                                                                                                                                                     |                |              |  |  |  |          |       |                |      |             |          |     |   |        |     |   |        |          |      |   |        |      |   |        |             |                     |          |   |        |              |          |   |        |              |          |   |       |               |     |   |              |
|                                                                                                                                                                                     | modality                                                                                                                                                                                                                                                                                                                                                                                                                                                                                                                                                                                                                                                                                                                                                                                                                                                                                                                                                                                                                                                                                                                                                                                                                                                                                                                                                                                                                                                                                                                                                                                                                                                                                                                                                                                                                                                                                                                                                                                                                                                                                                                                            | model                                                                                                                                                                               | use conformer? | prop         |  |  |  |          |       |                |      |             |          |     |   |        |     |   |        |          |      |   |        |      |   |        |             |                     |          |   |        |              |          |   |        |              |          |   |       |               |     |   |              |
| graph-based                                                                                                                                                                         | 2D graph                                                                                                                                                                                                                                                                                                                                                                                                                                                                                                                                                                                                                                                                                                                                                                                                                                                                                                                                                                                                                                                                                                                                                                                                                                                                                                                                                                                                                                                                                                                                                                                                                                                                                                                                                                                                                                                                                                                                                                                                                                                                                                                                            | GCN                                                                                                                                                                                 | x              | 62.304       |  |  |  |          |       |                |      |             |          |     |   |        |     |   |        |          |      |   |        |      |   |        |             |                     |          |   |        |              |          |   |        |              |          |   |       |               |     |   |              |
|                                                                                                                                                                                     |                                                                                                                                                                                                                                                                                                                                                                                                                                                                                                                                                                                                                                                                                                                                                                                                                                                                                                                                                                                                                                                                                                                                                                                                                                                                                                                                                                                                                                                                                                                                                                                                                                                                                                                                                                                                                                                                                                                                                                                                                                                                                                                                                     | GIN                                                                                                                                                                                 | x              | 62.980       |  |  |  |          |       |                |      |             |          |     |   |        |     |   |        |          |      |   |        |      |   |        |             |                     |          |   |        |              |          |   |        |              |          |   |       |               |     |   |              |
|                                                                                                                                                                                     | 3D graph                                                                                                                                                                                                                                                                                                                                                                                                                                                                                                                                                                                                                                                                                                                                                                                                                                                                                                                                                                                                                                                                                                                                                                                                                                                                                                                                                                                                                                                                                                                                                                                                                                                                                                                                                                                                                                                                                                                                                                                                                                                                                                                                            | EGNN                                                                                                                                                                                | x              | 17.418       |  |  |  |          |       |                |      |             |          |     |   |        |     |   |        |          |      |   |        |      |   |        |             |                     |          |   |        |              |          |   |        |              |          |   |       |               |     |   |              |
|                                                                                                                                                                                     |                                                                                                                                                                                                                                                                                                                                                                                                                                                                                                                                                                                                                                                                                                                                                                                                                                                                                                                                                                                                                                                                                                                                                                                                                                                                                                                                                                                                                                                                                                                                                                                                                                                                                                                                                                                                                                                                                                                                                                                                                                                                                                                                                     | EGNN                                                                                                                                                                                | √              | 16.684       |  |  |  |          |       |                |      |             |          |     |   |        |     |   |        |          |      |   |        |      |   |        |             |                     |          |   |        |              |          |   |        |              |          |   |       |               |     |   |              |
| image-based                                                                                                                                                                         | image from imagemol                                                                                                                                                                                                                                                                                                                                                                                                                                                                                                                                                                                                                                                                                                                                                                                                                                                                                                                                                                                                                                                                                                                                                                                                                                                                                                                                                                                                                                                                                                                                                                                                                                                                                                                                                                                                                                                                                                                                                                                                                                                                                                                                 | ResNet18                                                                                                                                                                            | x              | 12.469       |  |  |  |          |       |                |      |             |          |     |   |        |     |   |        |          |      |   |        |      |   |        |             |                     |          |   |        |              |          |   |        |              |          |   |       |               |     |   |              |
|                                                                                                                                                                                     | video-1frame                                                                                                                                                                                                                                                                                                                                                                                                                                                                                                                                                                                                                                                                                                                                                                                                                                                                                                                                                                                                                                                                                                                                                                                                                                                                                                                                                                                                                                                                                                                                                                                                                                                                                                                                                                                                                                                                                                                                                                                                                                                                                                                                        | ResNet18                                                                                                                                                                            | √              | 11.237       |  |  |  |          |       |                |      |             |          |     |   |        |     |   |        |          |      |   |        |      |   |        |             |                     |          |   |        |              |          |   |        |              |          |   |       |               |     |   |              |
|                                                                                                                                                                                     | video-5frame                                                                                                                                                                                                                                                                                                                                                                                                                                                                                                                                                                                                                                                                                                                                                                                                                                                                                                                                                                                                                                                                                                                                                                                                                                                                                                                                                                                                                                                                                                                                                                                                                                                                                                                                                                                                                                                                                                                                                                                                                                                                                                                                        | ResNet18                                                                                                                                                                            | √              | 8.088        |  |  |  |          |       |                |      |             |          |     |   |        |     |   |        |          |      |   |        |      |   |        |             |                     |          |   |        |              |          |   |        |              |          |   |       |               |     |   |              |
|                                                                                                                                                                                     | video-60frame                                                                                                                                                                                                                                                                                                                                                                                                                                                                                                                                                                                                                                                                                                                                                                                                                                                                                                                                                                                                                                                                                                                                                                                                                                                                                                                                                                                                                                                                                                                                                                                                                                                                                                                                                                                                                                                                                                                                                                                                                                                                                                                                       | VIT                                                                                                                                                                                 | √              | <b>7.511</b> |  |  |  |          |       |                |      |             |          |     |   |        |     |   |        |          |      |   |        |      |   |        |             |                     |          |   |        |              |          |   |        |              |          |   |       |               |     |   |              |

|  |                                                                                                                                                                                                                                                                                                                                                                                                                                                                                                                                                                                                                                                                                                                                                                                                                                                                                                                                                                                                                                                                                                                                                                                                                                                                                                                                                                                                                                                                                                                                                                                                                                                                                                                                                                                                                                                                                                                                      |
|--|--------------------------------------------------------------------------------------------------------------------------------------------------------------------------------------------------------------------------------------------------------------------------------------------------------------------------------------------------------------------------------------------------------------------------------------------------------------------------------------------------------------------------------------------------------------------------------------------------------------------------------------------------------------------------------------------------------------------------------------------------------------------------------------------------------------------------------------------------------------------------------------------------------------------------------------------------------------------------------------------------------------------------------------------------------------------------------------------------------------------------------------------------------------------------------------------------------------------------------------------------------------------------------------------------------------------------------------------------------------------------------------------------------------------------------------------------------------------------------------------------------------------------------------------------------------------------------------------------------------------------------------------------------------------------------------------------------------------------------------------------------------------------------------------------------------------------------------------------------------------------------------------------------------------------------------|
|  | <p>representation without using any self-supervised tasks. It is well known that the development of drug discovery depends on accurately capturing chemical and biological representations of molecules. Here, we used several commonly used representative methods (such as GCN, GIN, EGNN, and the representation used by ImageMol) to inspect the model's ability to understand the 8 basic attributes of molecules, including molecular weight, MolLogP, MolMR, BalabanJ, NumHAcceptors, NumHDonors, NumValenceElectrons and TPSA.</p> <p>We randomly collected 10,000 molecules from the pre-training dataset and used exactly the same experimental setup for fair comparison. In detail, we split the training set, validation set, and test set using a ratio of 8:1:1 and reported the results on the test set based on the best validation set score. As shown in Supplementary Table 1, we found that VideoMol using only one frame outperformed that of the 2D graph-based methods, the 3D-based graph method and the 2D image-based method, revealing the advantage of 3D representation. Specifically, compared with the second-place ImageMol without pre-training, the performance of video-1frame improved by 11%. When we utilized all video frames (video-60frame), the performance is further significantly improved from 12.47 to 7.55 with a 66% improvement rate.</p> <p>In summary, the proposed 3D representation (whether based on a single frame image or a 60-frame video) has advantages compared to existing molecular representation approaches. We will further improve our VideoMol framework by increasing the number of 3D frames and integrating other types of 3D representation (such as AlphaFold3<sup>11</sup>) in the near future.</p> <p>[11] Abramson J, Adler J, Dunger J, et al. Accurate structure prediction of biomolecular interactions with AlphaFold 3[J]. Nature, 2024: 1-3.</p> |
|--|--------------------------------------------------------------------------------------------------------------------------------------------------------------------------------------------------------------------------------------------------------------------------------------------------------------------------------------------------------------------------------------------------------------------------------------------------------------------------------------------------------------------------------------------------------------------------------------------------------------------------------------------------------------------------------------------------------------------------------------------------------------------------------------------------------------------------------------------------------------------------------------------------------------------------------------------------------------------------------------------------------------------------------------------------------------------------------------------------------------------------------------------------------------------------------------------------------------------------------------------------------------------------------------------------------------------------------------------------------------------------------------------------------------------------------------------------------------------------------------------------------------------------------------------------------------------------------------------------------------------------------------------------------------------------------------------------------------------------------------------------------------------------------------------------------------------------------------------------------------------------------------------------------------------------------------|

#### Ref 1.5 – “Sensitivity of VideoMol for video generation source” –

|                  |                                                                                                                                                                                                                                                                                                                                                                                                                                                                                                                                                                                                                                                                                                                                                                                                                                                                                      |
|------------------|--------------------------------------------------------------------------------------------------------------------------------------------------------------------------------------------------------------------------------------------------------------------------------------------------------------------------------------------------------------------------------------------------------------------------------------------------------------------------------------------------------------------------------------------------------------------------------------------------------------------------------------------------------------------------------------------------------------------------------------------------------------------------------------------------------------------------------------------------------------------------------------|
| Reviewer Comment | How sensitive is the framework to the source for video generation, in this case RDKit. I assume it is quite dependent on this platform, and thus, VideoMol probably does not allow for mixing videos from different sources. Does this pose any kind of limitation in real-world applications?                                                                                                                                                                                                                                                                                                                                                                                                                                                                                                                                                                                       |
| Author Response  | <p>We thank the reviewer for this critique. To evaluate the sensitivity of VideoMol to video generation sources, we utilized two additional methods to generate molecular videos as below:</p> <ol style="list-style-type: none"> <li>1. OpenBabel<sup>[1]</sup>: It is a chemical toolbox designed to code many languages of chemical data, which generates 3D conformer by four steps: (1) Use the OBBUILDER to create a 3D structure using rules and fragment templates; (2) Use 250 steps of a steepest descent geometry optimization with the MMFF94 forcefield; (3) Use 200 iterations of a Weighted Rotor conformational search (optimizing each conformer with 25 steps of a steepest descent); (4) Use 250 steps of a conjugate gradient geometry optimization.</li> <li>2. DeepChem<sup>[2]</sup>: It aims to provide a high quality open-source toolchain that</li> </ol> |

democratizes the use of deep-learning in drug discovery, materials science, quantum chemistry, and biology. It uses three steps to generate molecular conformer: (1) Generate a pool of conformers using UFF force field; (2) Minimize conformers; (3) Prune conformers using an RMSD threshold.

As shown in the revised **Extended Table 1** (the Revised Supplemental Table 27), we found that the video generation source has no significant impact on VideoMol with an average performance of 0.755±0.068 (Openbabel), 0.755±0.072 (DeepChem), 0.742±0.064 (RDKit) in RMSE metric and 0.581±0.057 (Openbabel), 0.576±0.060 (DeepChem), 0.565±0.053 (RDKit) performance in MAE metric. Therefore, VideoMol has low sensitivity to video generation sources.

**Extended Table 1** (the Revised Supplemental Table 27). The performance of different video generation source on 10 kinases datasets with balanced scaffold split.

|              | 1. 5HT1A           |                    | 2. 5HT2A           |                    | 3. AA1R            |                    |
|--------------|--------------------|--------------------|--------------------|--------------------|--------------------|--------------------|
|              | RMSE               | MAE                | RMSE               | MAE                | RMSE               | MAE                |
| Openbabel    | 0.733±0.009        | 0.562±0.006        | 0.796±0.004        | 0.597±0.003        | 0.666±0.014        | 0.510±0.011        |
| DeepChem     | 0.718±0.006        | 0.557±0.009        | 0.790±0.016        | 0.595±0.019        | 0.677±0.014        | 0.504±0.010        |
| RDKit        | <b>0.708±0.017</b> | <b>0.547±0.015</b> | <b>0.775±0.017</b> | <b>0.577±0.009</b> | <b>0.655±0.007</b> | <b>0.496±0.006</b> |
| — continue — |                    |                    |                    |                    |                    |                    |
|              | 4. AA2AR           |                    | 5. AA3R            |                    | 6. CNR2            |                    |
|              | RMSE               | MAE                | RMSE               | MAE                | RMSE               | MAE                |
| Openbabel    | 0.705±0.004        | 0.548±0.008        | <b>0.779±0.015</b> | 0.618±0.009        | 0.903±0.018        | 0.714±0.012        |
| DeepChem     | <b>0.703±0.005</b> | 0.558±0.004        | 0.798±0.019        | 0.620±0.015        | 0.896±0.013        | 0.708±0.012        |
| RDKit        | 0.712±0.011        | <b>0.543±0.005</b> | 0.786±0.006        | <b>0.617±0.004</b> | <b>0.864±0.005</b> | <b>0.679±0.010</b> |
| — continue — |                    |                    |                    |                    |                    |                    |
|              | 7. DRD2            |                    | 8. DRD3            |                    | 9. HRH3            |                    |
|              | RMSE               | MAE                | RMSE               | MAE                | RMSE               | MAE                |
| Openbabel    | 0.763±0.018        | 0.562±0.009        | 0.745±0.005        | 0.580±0.003        | 0.679±0.004        | 0.524±0.004        |
| DeepChem     | 0.745±0.005        | <b>0.551±0.002</b> | 0.728±0.014        | 0.556±0.008        | <b>0.666±0.005</b> | <b>0.505±0.002</b> |
| RDKit        | <b>0.742±0.004</b> | 0.556±0.005        | <b>0.715±0.014</b> | <b>0.554±0.012</b> | 0.668±0.008        | 0.506±0.002        |
| — continue — |                    |                    |                    |                    |                    |                    |
|              | 10. OPRM           |                    | Mean               |                    |                    |                    |
|              | RMSE               | MAE                | RMSE               | MAE                |                    |                    |
| Openbabel    | <b>0.776±0.008</b> | 0.590±0.001        | 0.755±0.068        | 0.581±0.057        |                    |                    |
| DeepChem     | 0.825±0.008        | 0.607±0.009        | 0.755±0.072        | 0.576±0.060        |                    |                    |
| RDKit        | 0.795±0.015        | <b>0.579±0.011</b> | <b>0.742±0.064</b> | <b>0.565±0.053</b> |                    |                    |

### References

- [1] O'Boyle N M, Banck M, James C A, et al. Open Babel: An open chemical toolbox[J]. *Journal of Cheminformatics*, 2011, 3: 1-14. URL: <https://github.com/openbabel/openbabel>
- [2] Altae-Tran H, Ramsundar B, Pappu A S, et al. Low data drug discovery

|                                 |                                                                                                                                                                                                                                                                                                                                                                                                                                                                                                                                                                                                                                                                                                                                                                                                                                                                                                                                                                                                                |
|---------------------------------|----------------------------------------------------------------------------------------------------------------------------------------------------------------------------------------------------------------------------------------------------------------------------------------------------------------------------------------------------------------------------------------------------------------------------------------------------------------------------------------------------------------------------------------------------------------------------------------------------------------------------------------------------------------------------------------------------------------------------------------------------------------------------------------------------------------------------------------------------------------------------------------------------------------------------------------------------------------------------------------------------------------|
|                                 | with one-shot learning[J]. <i>ACS Central Science</i> , 2017, 3(4): 283-293. URL: <a href="https://github.com/deepchem/deepchem">https://github.com/deepchem/deepchem</a>                                                                                                                                                                                                                                                                                                                                                                                                                                                                                                                                                                                                                                                                                                                                                                                                                                      |
| Excerpt from Revised Manuscript | <p>Ablation study:</p> <p><i>Sensitivity of VideoMol for video generation source.</i> To verify the sensitivity of VideoMol to video generation sources, we used two additional platforms to generate molecular videos, which are OpenBabel<sup>58</sup> and DeepChem<sup>59</sup>. We found that the video generation source of different platforms has no significant impact on VideoMol with an average performance of 0.755±0.068 (Openbabel), 0.755±0.072 (DeepChem), 0.750±0.065 (RDKit) in RMSE metric and 0.581±0.057 (Openbabel), 0.576±0.060 (DeepChem), 0.572±0.056 (RDKit) in MAE metric (Supplementary Table 27). Therefore, VideoMol has low sensitivity to video generation sources from different platforms.</p> <p>References</p> <p>[58] O'Boyle, N.M. et al. Open Babel: An open chemical toolbox. 3, 1-14 (2011).</p> <p>[59] Altae-Tran, H., Ramsundar, B., Pappu, A.S. &amp; Pande, V. Low data drug discovery with one-shot learning. <i>ACS central science</i> 3, 283-293 (2017).</p> |

**Comments on code availability – “The provided code is **clean and well organized**” –**

|                  |                                                                                                                                                                                                                                                                                                                                                                                                                                                                                                                                                                                                                                                                                                                                                                                                                                                                                                                                                                                                                                                                                                             |
|------------------|-------------------------------------------------------------------------------------------------------------------------------------------------------------------------------------------------------------------------------------------------------------------------------------------------------------------------------------------------------------------------------------------------------------------------------------------------------------------------------------------------------------------------------------------------------------------------------------------------------------------------------------------------------------------------------------------------------------------------------------------------------------------------------------------------------------------------------------------------------------------------------------------------------------------------------------------------------------------------------------------------------------------------------------------------------------------------------------------------------------|
| Reviewer Comment | The provided code is clean and well organized. The authors also included a docker image for setting up the environment. The code for training the model as well as reproducing the results is included. I believe only the code for VideoMol is provided, and not for the baseline methods. Not necessary, but if it is easy to include the related methods, the community might appreciate a full testbed.                                                                                                                                                                                                                                                                                                                                                                                                                                                                                                                                                                                                                                                                                                 |
| Author Response  | <p>We thank the reviewer for checking our codes. We have provided codes for the baseline methods and related methods/models as well in this link (<a href="https://1drv.ms/f/s!Atau0ecyBQNTgTd736-8RPWEXSVt?e=DkOyw2">https://1drv.ms/f/s!Atau0ecyBQNTgTd736-8RPWEXSVt?e=DkOyw2</a>).</p> <p>Of course, you can also access it via our github repository (<a href="https://github.com/ChengF-Lab/VideoMol">https://github.com/ChengF-Lab/VideoMol</a>), as shown below:</p> <div style="border: 1px solid red; padding: 2px; margin: 5px 0;">The code for other comparison methods can be accessed through <a href="#">this link</a>.</div> <p><b>Reference</b></p> <hr/> <p>[1] Landrum G. RDKit: A software suite for cheminformatics, computational chemistry, and predictive modeling[J]. Greg Landrum, 2013, 8: 31.</p> <p>[2] DeLano W L. Pymol: An open-source molecular graphics tool[J]. CCP4 Newsl. Protein Crystallogr, 2002, 40(1): 82-92.</p> <p>[3] Hu W, Fey M, Ren H, et al. Ogb-lsc: A large-scale challenge for machine learning on graphs[J]. arXiv preprint arXiv:2103.09430, 2021.</p> |

## Responses to the Reviewer #3

### Overall Summary – “The work is **valuable** to the field in multiple areas” –

|                  |                                                                                                                                                                                                                                                                                                                                                                                                                                                                                                                                                                                                                                                                                                                                                                                                                                                                                                         |
|------------------|---------------------------------------------------------------------------------------------------------------------------------------------------------------------------------------------------------------------------------------------------------------------------------------------------------------------------------------------------------------------------------------------------------------------------------------------------------------------------------------------------------------------------------------------------------------------------------------------------------------------------------------------------------------------------------------------------------------------------------------------------------------------------------------------------------------------------------------------------------------------------------------------------------|
| Reviewer Comment | <p>The manuscript presents a video-based pretrained model that can be used to make downstream task predictions across multiple tasks with finetuning. The results are an improvement upon authors' previous work, ImageMol. The improvement is tied to use of video, which can be considered as an augmentation to static images, as well as the use of more comprehensive fingerprints that provide chemical, pharmacological and physicochemistry information. The authors show, through extensive testing, that the new model outperforms the previous and is at least as good or as better as some SOTA models for different tasks.</p> <p>Impact to field: The work is <b>valuable to the field in multiple areas</b>: it is a demonstration of technology transfer from video representation learning. It shows new self supervision tasks that are meaningful for molecule structure videos.</p> |
| Author Response  | <p>We thank the Reviewer for great summary and his/her support on the important value of our proposed VideoMol in multiple drug discovery tasks.</p>                                                                                                                                                                                                                                                                                                                                                                                                                                                                                                                                                                                                                                                                                                                                                    |

### Ref 2.1 – “More explanations about dynamics” –

|                                 |                                                                                                                                                                                                                                                                                                                                                                                                                                                                                                                                                                                                                                                           |
|---------------------------------|-----------------------------------------------------------------------------------------------------------------------------------------------------------------------------------------------------------------------------------------------------------------------------------------------------------------------------------------------------------------------------------------------------------------------------------------------------------------------------------------------------------------------------------------------------------------------------------------------------------------------------------------------------------|
| Reviewer Comment                | <p>Unlike stated, the model does not capture a dynamic conformation of the molecule. The videos are not generated to represent any physical dynamics, or conformer change, or changes to torsion angles etc. They are movies with standardized rotations around given axis. As such, they are only augmentations to enrich the model input about the 3D structure of the molecule. Authors should consider another wording than dynamics to prevent misleading the reader.</p>                                                                                                                                                                            |
| Author Response                 | <p>We thank the reviewer for these critiques. We agreed with the reviewer that the current ViodeMol framework cannot capture the physical dynamics or conformational changes of ligand-receptor dynamics. Integrating physical dynamics or conformational changes from 3D ligand-receptor structures or models (i.e., alphaFold3 [1]) may improve performance of ViodeMol in the future. We have changed our original claims and added more explanations in the revised manuscript.</p> <p>Reference<br/>[1] Abramson J, Adler J, Dunger J, et al. Accurate structure prediction of biomolecular interactions with AlphaFold 3[J]. Nature, 2024: 1-3.</p> |
| Excerpt from Revised Manuscript | <p>Results:</p> <p><b>Framework of VideoMol</b></p> <p>Molecules exist in nature and are constantly conformational dynamics,</p>                                                                                                                                                                                                                                                                                                                                                                                                                                                                                                                          |



making video the most direct representation method. The molecular 3D information can be directly observed from the video without the help of manual feature extraction, such as the distance between pairs of atoms and the angle formed between multiple atoms and so on. In addition, we evaluated the advantages of different representations in feature extraction capabilities and found that our proposed video representation has obvious advantages over existing representations with a 66% improvement rate on 8 basic attributes (Supplementary Section C.2 and Supplementary Table 1). Therefore, these significant differences motivate us to develop VideoMol for accurately predicting the targets and properties of molecules in the form of videos derived from molecules.

### **C.2 Results of different representations on 8 basic attributes**

To fairly compare the effects of different representations, we evaluated the representation without using any self-supervised tasks. It is well known that the development of drug discovery depends on accurately capturing chemical and biological representations of molecules. Here, we used several commonly used representative methods (such as GCN, GIN, EGNN, and the representation used by ImageMol) to inspect the model's ability to understand the 8 basic attributes of molecules, including molecular weight, MolLogP, MolMR, BalabanJ, NumHAcceptors, NumHDonors, NumValenceElectrons and TPSA.

We randomly collected 10,000 molecules from the pre-training dataset and used exactly the same experimental setup for fair comparison. In detail, we split the training set, validation set, and test set using a ratio of 8:1:1 and reported the results on the test set based on the best validation set score. As shown in Supplementary Table 1, we found that VideoMol using only one frame outperformed that of the 2D graph-based methods, the 3D-based graph method and the 2D image-based method, revealing the advantage of 3D representation. Specifically, compared with the second-place ImageMol without pre-training, the performance of video-1frame improved by 11%. When we utilized all video frames (video-60frame), the performance is further significantly improved from 12.47 to 7.55 with a 66% improvement rate.

In summary, the proposed 3D representation (whether based on a single frame image or a 60-frame video) has advantages compared to existing molecular representation approaches. We will further improve our VideoMol framework by increasing the number of 3D frames and integrating other types of 3D representation (such as AlphaFold311) in the near future.

[11] Abramson J, Adler J, Dunger J, et al. Accurate structure prediction of biomolecular interactions with AlphaFold 3[J]. Nature, 2024: 1-3.

### **Discussion**

Using a simple extension to VideoMol, we can allow the model to learn the correlations and variances between different conformations in the same molecule from videos of dynamic changes, thereby further playing an important role in molecular dynamics scenarios.

We believe that it is promising to represent molecules and perform inferences through videos as molecular imaging techniques continue to

|  |                                                                                                                                                                                                                                                                        |
|--|------------------------------------------------------------------------------------------------------------------------------------------------------------------------------------------------------------------------------------------------------------------------|
|  | advance. In summary, the introduction of VideoMol on the one hand enriches the form of molecular representation in the field of computational drug discovery, and on the other hand inspires people to learn and understand the molecules from different perspectives. |
|--|------------------------------------------------------------------------------------------------------------------------------------------------------------------------------------------------------------------------------------------------------------------------|

**Ref 2.2 – “Equivariant graph neural networks or transformers can be used to eliminate the need to perform augmentation for different rotations” –**

|                  |                                                                                                                                                                                                                                                                                                                                                                                                                                                                                                                                                                                                                                                                                                                                                                                                                                                                                                                                                                                                                                                                                                                                                                                                                                                                                                                                                                                                                                                                                                                                                                                                                                                                                                                                                                                                                                                                                                                                                                                                                                                                                                                                                                                                       |
|------------------|-------------------------------------------------------------------------------------------------------------------------------------------------------------------------------------------------------------------------------------------------------------------------------------------------------------------------------------------------------------------------------------------------------------------------------------------------------------------------------------------------------------------------------------------------------------------------------------------------------------------------------------------------------------------------------------------------------------------------------------------------------------------------------------------------------------------------------------------------------------------------------------------------------------------------------------------------------------------------------------------------------------------------------------------------------------------------------------------------------------------------------------------------------------------------------------------------------------------------------------------------------------------------------------------------------------------------------------------------------------------------------------------------------------------------------------------------------------------------------------------------------------------------------------------------------------------------------------------------------------------------------------------------------------------------------------------------------------------------------------------------------------------------------------------------------------------------------------------------------------------------------------------------------------------------------------------------------------------------------------------------------------------------------------------------------------------------------------------------------------------------------------------------------------------------------------------------------|
| Reviewer Comment | If the manuscript's main aim was to inject more information about the 3d nature of the molecules, they could have considered an equivariant graph neural network or transformer. An equivariant neural network would remove the need to perform augmentation for different rotations.                                                                                                                                                                                                                                                                                                                                                                                                                                                                                                                                                                                                                                                                                                                                                                                                                                                                                                                                                                                                                                                                                                                                                                                                                                                                                                                                                                                                                                                                                                                                                                                                                                                                                                                                                                                                                                                                                                                 |
| Author Response  | <p>We thank the reviewer for this valuable point. We agreed with reviewer that equivariant graph neural networks or transformers can indeed inject more information about the 3D nature of molecules by learning on well-characterized rotation-independent features. However, video and graph are complementary and they each have unique advantages in data presentation and analysis. There are several essential differences between VideoMol and equivariant graph neural network in obtaining the 3D of molecules as reflected below:</p> <p><b>(1) Modality representation.</b> Obviously, video and graph are completely different in representation. There are several advantages for choosing video for molecular representation. First, video is a more intuitive representation method and information related to 3D nature can be directly observed from the videos, which allows the model to learn the information of bioactive molecules directly from the video without the help of any manual feature extraction. Secondly, VideoMol attempts the feasibility of learning representations from molecular videos and can be extended to learn a video related to potential ligand-receptor information by integrating with alphaFold3 or other available tools in the future.</p> <p><b>(2) Feature extraction.</b> VideoMol extracts dense pixel-level features, while the graph-based model extracts relaxed node-level features. VideoMol allows the model to perceive 3D information in molecules by learning local textures in videos, such as the distance between pairs of atoms and the angle formed between three atoms and so on (as shown in the below <b>Extended Figure 1</b>). In contrast, 3D graph-based methods require the intervention of explicit knowledge to guide the model to learn this information.</p> <p>These significant differences motivate us to develop a deep learning method based on video representations and we can also see significant advantages of VideoMol as we demonstrated in multiple drug discovery tasks. We have added these new explanations in the revised manuscript (Section Motivation for using video representations).</p> |

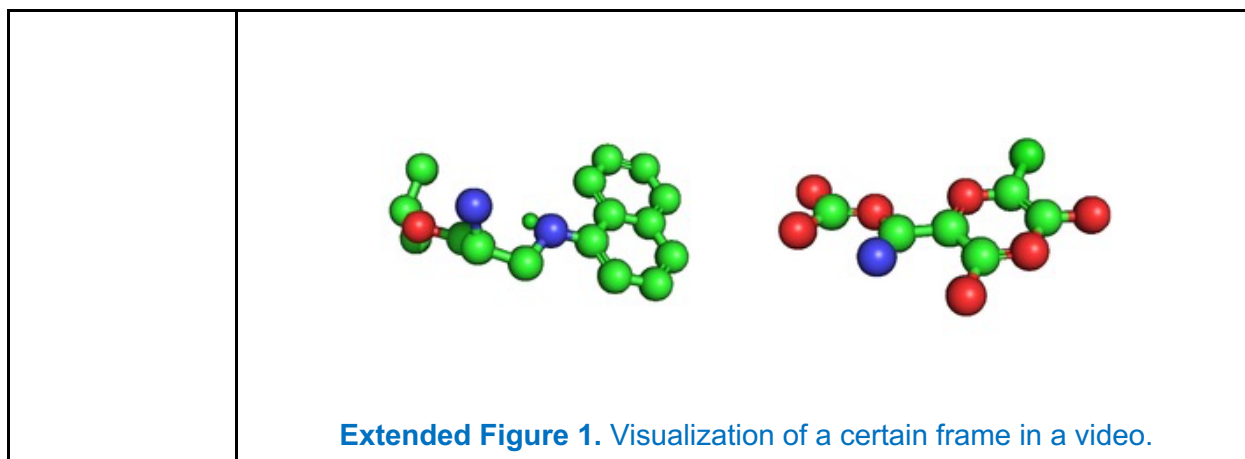

**Ref 2.3 – “Design experiment to understand why video information does not lead to sensitivity to conformer” –**

|                  |                                                                                                                                                                                                                                                                                                                                                                                                                                                                                                                                                                                                                                                                                                                                                                                                                                                                                                                                                                                                                                                                                                                                                                                                                                                                                                                                                                                                                                                   |
|------------------|---------------------------------------------------------------------------------------------------------------------------------------------------------------------------------------------------------------------------------------------------------------------------------------------------------------------------------------------------------------------------------------------------------------------------------------------------------------------------------------------------------------------------------------------------------------------------------------------------------------------------------------------------------------------------------------------------------------------------------------------------------------------------------------------------------------------------------------------------------------------------------------------------------------------------------------------------------------------------------------------------------------------------------------------------------------------------------------------------------------------------------------------------------------------------------------------------------------------------------------------------------------------------------------------------------------------------------------------------------------------------------------------------------------------------------------------------|
| Reviewer Comment | <p>This is where it gets interesting: if the success of the model was truly due to better representation of 3d structure, we would expect the model to be sensitive to different conformers, especially on tasks that provide a binding affinity proxy. While, in multiple places in the manuscript the opposite is claimed, that model is robust to molecule conformer choice. Perhaps authors can devise an experiment to understand why video information does not lead to sensitivity to conformer.</p>                                                                                                                                                                                                                                                                                                                                                                                                                                                                                                                                                                                                                                                                                                                                                                                                                                                                                                                                       |
| Author Response  | <p>We agreed with the reviewer that the experimental section of “<i>Robustness of VideoMol</i>” is confused because we evaluated the performance of different models on different conformers, which does not reflect the robustness of a single model to different conformations.</p> <p>Therefore, we designed new experiments and evaluated the sensitivity of the same VideoMol model to different conformations. Specifically, we directly used pre-trained VideoMol to extract features of molecules with different conformers from 10 kinases datasets of binding affinity profiles and compared the similarities between different videos with different conformers. Since the similarity between conformers is related to their RMSD (Root-Mean-Square Deviation) distance, we also calculated the similarity of features in different RMSD intervals.</p> <p>As shown in the <b>Extended Table 1</b> (the Revised Supplemental Table 28) below, we found that VideoMol was discriminative for videos from different conformers. Further, when the RMSD between two conformations is larger, the feature similarity extracted by VideoMol shows a decreasing trend. Especially in the 90-100 percentile range, the feature similarity extracted by VideoMol is always the lowest. Therefore, VideoMol is sensitive to different conformers. We have added these new results and more detailed explanations in the revised manuscript.</p> |

**Extended Table 1** (the Revised Supplemental Table 28). The ability of VideoMol to distinguish different conformers. The percentile interval refers to sorting all RMSD values from small to large and selecting the value corresponding to the percentile interval.

| Percentile interval in RMSD | 5HT1A | 5HT2A | AA1R  | AA2AR | AA3R  |
|-----------------------------|-------|-------|-------|-------|-------|
| 0-10                        | 0.692 | 0.749 | 0.799 | 0.803 | 0.823 |
| 10-20                       | 0.724 | 0.726 | 0.786 | 0.784 | 0.771 |
| 20-30                       | 0.741 | 0.747 | 0.755 | 0.764 | 0.772 |
| 30-40                       | 0.726 | 0.733 | 0.749 | 0.747 | 0.752 |
| 40-50                       | 0.735 | 0.745 | 0.759 | 0.772 | 0.758 |
| 50-60                       | 0.703 | 0.744 | 0.765 | 0.761 | 0.760 |
| 60-70                       | 0.708 | 0.733 | 0.742 | 0.756 | 0.745 |
| 70-80                       | 0.663 | 0.748 | 0.753 | 0.743 | 0.766 |
| 80-90                       | 0.631 | 0.702 | 0.745 | 0.753 | 0.752 |
| 90-100                      | 0.518 | 0.625 | 0.654 | 0.702 | 0.733 |
| 0-100 (all data)            | 0.684 | 0.725 | 0.751 | 0.758 | 0.763 |
| ===== continue =====        |       |       |       |       |       |
| Percentile interval in RMSD | CNR2  | DRD2  | DRD3  | HRH3  | OPRM  |
| 0-10                        | 0.769 | 0.729 | 0.701 | 0.740 | 0.730 |
| 10-20                       | 0.747 | 0.733 | 0.740 | 0.721 | 0.740 |
| 20-30                       | 0.736 | 0.750 | 0.779 | 0.690 | 0.708 |
| 30-40                       | 0.735 | 0.748 | 0.795 | 0.703 | 0.716 |
| 40-50                       | 0.723 | 0.760 | 0.775 | 0.709 | 0.712 |
| 50-60                       | 0.710 | 0.743 | 0.785 | 0.706 | 0.725 |
| 60-70                       | 0.696 | 0.748 | 0.777 | 0.698 | 0.727 |
| 70-80                       | 0.712 | 0.715 | 0.775 | 0.700 | 0.716 |
| 80-90                       | 0.709 | 0.707 | 0.723 | 0.669 | 0.680 |
| 90-100                      | 0.680 | 0.615 | 0.631 | 0.585 | 0.658 |
| 0-100 (all data)            | 0.722 | 0.725 | 0.748 | 0.692 | 0.711 |

Excerpt from  
Revised  
Manuscript

**Results:**

*VideoMol captures conformational differences of molecules.* We used pre-trained VideoMol to extract features of molecules with different conformers from 10 compound-kinase interaction datasets and compared the cosine similarities between different videos with different conformers. Since the similarity between conformers is related to their RMSD (Root-Mean-Square Deviation) distance, we also calculated the similarity of features in different RMSD intervals. We found that VideoMol is discriminative for videos from different conformers (Supplementary Table 28). Further, when the RMSD between two conformations is larger, the feature similarity extracted by VideoMol shows a decreasing trend. Especially in the 90-100 percentile range, the feature similarity extracted by VideoMol is always the lowest. Therefore, VideoMol can effectively capture conformational differences of molecules.

**Ref 2.4 – “Add more discussion about understanding from where exactly the accuracy improvement comes from” –**

| Reviewer Comment   | Which makes me think the success of the model is not due to better 3d representation but one of the several other changes: 1-working with video frames and the new self-supervision tasks have expanded the effective size of the data and complexity the network processes each molecule (perhaps this is why the number of frames seem to change the prediction accuracy) 2-the large number of domain information that is crafted into the fingerprint may be impactful in several tasks in this work. Further understanding from where exactly the accuracy improvement comes from, can be considered for future work. In the meantime, the claims of impact of 3D could be dialed down.                                                                                                                                                                                                                                                                                                                                                                                                                                                                                                                                                                                                                                                                                                                                                                                                                                                                                                                                                                                                                                                                                                                                                                                                                                                                                                                                                                                                                                                                                                                                                                                                                                                                                                                                                                                                                                                                                                                                                                                                                                                                                                                                                                                                                                                                                                                                                                                                                                                                                                                                                                                                                                                                                                                                                                                                                                                                                                                                                                                                                                                                                                                                                                                                                                                                                                                                                                                                                                                                                                                                                                                                                                                                                                                                                                                  |                    |                    |                    |                    |                    |       |  |      |     |      |     |      |     |              |             |             |             |             |            |             |             |             |             |             |             |             |             |                 |             |             |            |             |             |             |                |             |             |                    |                    |                    |             |                    |             |             |             |             |             |             |                |                    |                    |             |             |             |                    |                 |             |             |             |             |             |             |          |                    |                    |                    |                    |                    |                    |          |      |  |      |  |      |  |      |     |      |     |      |     |              |             |             |             |             |             |             |             |             |             |             |             |             |             |                 |            |             |             |             |             |             |                |             |             |             |             |                    |                    |                    |             |             |             |             |             |             |                |                    |                    |                    |                    |             |             |                 |             |             |             |             |             |             |          |                    |                    |                    |                    |                    |                    |
|--------------------|-------------------------------------------------------------------------------------------------------------------------------------------------------------------------------------------------------------------------------------------------------------------------------------------------------------------------------------------------------------------------------------------------------------------------------------------------------------------------------------------------------------------------------------------------------------------------------------------------------------------------------------------------------------------------------------------------------------------------------------------------------------------------------------------------------------------------------------------------------------------------------------------------------------------------------------------------------------------------------------------------------------------------------------------------------------------------------------------------------------------------------------------------------------------------------------------------------------------------------------------------------------------------------------------------------------------------------------------------------------------------------------------------------------------------------------------------------------------------------------------------------------------------------------------------------------------------------------------------------------------------------------------------------------------------------------------------------------------------------------------------------------------------------------------------------------------------------------------------------------------------------------------------------------------------------------------------------------------------------------------------------------------------------------------------------------------------------------------------------------------------------------------------------------------------------------------------------------------------------------------------------------------------------------------------------------------------------------------------------------------------------------------------------------------------------------------------------------------------------------------------------------------------------------------------------------------------------------------------------------------------------------------------------------------------------------------------------------------------------------------------------------------------------------------------------------------------------------------------------------------------------------------------------------------------------------------------------------------------------------------------------------------------------------------------------------------------------------------------------------------------------------------------------------------------------------------------------------------------------------------------------------------------------------------------------------------------------------------------------------------------------------------------------------------------------------------------------------------------------------------------------------------------------------------------------------------------------------------------------------------------------------------------------------------------------------------------------------------------------------------------------------------------------------------------------------------------------------------------------------------------------------------------------------------------------------------------------------------------------------------------------------------------------------------------------------------------------------------------------------------------------------------------------------------------------------------------------------------------------------------------------------------------------------------------------------------------------------------------------------------------------------------------------------------------------------------------------------------------------|--------------------|--------------------|--------------------|--------------------|--------------------|-------|--|------|-----|------|-----|------|-----|--------------|-------------|-------------|-------------|-------------|------------|-------------|-------------|-------------|-------------|-------------|-------------|-------------|-------------|-----------------|-------------|-------------|------------|-------------|-------------|-------------|----------------|-------------|-------------|--------------------|--------------------|--------------------|-------------|--------------------|-------------|-------------|-------------|-------------|-------------|-------------|----------------|--------------------|--------------------|-------------|-------------|-------------|--------------------|-----------------|-------------|-------------|-------------|-------------|-------------|-------------|----------|--------------------|--------------------|--------------------|--------------------|--------------------|--------------------|----------|------|--|------|--|------|--|------|-----|------|-----|------|-----|--------------|-------------|-------------|-------------|-------------|-------------|-------------|-------------|-------------|-------------|-------------|-------------|-------------|-------------|-----------------|------------|-------------|-------------|-------------|-------------|-------------|----------------|-------------|-------------|-------------|-------------|--------------------|--------------------|--------------------|-------------|-------------|-------------|-------------|-------------|-------------|----------------|--------------------|--------------------|--------------------|--------------------|-------------|-------------|-----------------|-------------|-------------|-------------|-------------|-------------|-------------|----------|--------------------|--------------------|--------------------|--------------------|--------------------|--------------------|
| Author Response    | <p>We thank the Reviewer for these excellent points. We agree that the success achieved by VideoMol may be related to the introduction of self-supervised tasks and fingerprints. In <b>Supplementary Table 24</b>, we perform ablation experiments on different self-supervised pre-training tasks, and we find that each pre-training task can promote the improvement of VideoMol performance.</p> <p>Supplementary Table 24: Effect of pre-training strategy on 6 regression datasets with balanced scaffold split. w/o pretrain means no pre-trained VideoMol. video-aware, direction-aware, and chemical-aware represent pre-training VideoMol using only video-aware strategy, direction-aware strategy, and chemical-aware strategy, respectively. &amp; represents the combination of multiple pre-training tasks. All means and standard deviations are reported through three independent runs.</p> <table border="1" data-bbox="370 1050 1414 1774"> <thead> <tr> <th rowspan="2">strategy</th> <th colspan="2">5HT1A</th> <th colspan="2">AA1R</th> <th colspan="2">AA2AR</th> </tr> <tr> <th>RMSE</th> <th>MAE</th> <th>RMSE</th> <th>MAE</th> <th>RMSE</th> <th>MAE</th> </tr> </thead> <tbody> <tr> <td>w/o pretrain</td> <td>0.993±0.001</td> <td>0.804±0.002</td> <td>0.919±0.006</td> <td>0.755±0.008</td> <td>1.073±0.01</td> <td>0.882±0.013</td> </tr> <tr> <td>video-aware</td> <td>0.772±0.011</td> <td>0.604±0.009</td> <td>0.709±0.007</td> <td>0.783±0.010</td> <td>0.847±0.002</td> <td>0.651±0.002</td> </tr> <tr> <td>direction-aware</td> <td>0.871±0.002</td> <td>0.691±0.004</td> <td>0.821±0.01</td> <td>0.652±0.013</td> <td>0.875±0.008</td> <td>0.701±0.012</td> </tr> <tr> <td>chemical-aware</td> <td>0.736±0.012</td> <td>0.566±0.014</td> <td><u>0.662±0.018</u></td> <td><b>0.494±0.015</b></td> <td><u>0.716±0.001</u></td> <td>0.562±0.002</td> </tr> <tr> <td>chemical_direction</td> <td>0.718±0.002</td> <td>0.559±0.004</td> <td>0.706±0.005</td> <td>0.516±0.008</td> <td>0.724±0.008</td> <td>0.568±0.003</td> </tr> <tr> <td>chemical_video</td> <td><u>0.716±0.010</u></td> <td><u>0.553±0.010</u></td> <td>0.670±0.007</td> <td>0.511±0.005</td> <td>0.719±0.013</td> <td><u>0.553±0.014</u></td> </tr> <tr> <td>direction_video</td> <td>0.774±0.014</td> <td>0.603±0.015</td> <td>0.730±0.004</td> <td>0.553±0.002</td> <td>0.865±0.011</td> <td>0.672±0.005</td> </tr> <tr> <td>VideoMol</td> <td><b>0.708±0.017</b></td> <td><b>0.547±0.015</b></td> <td><b>0.655±0.007</b></td> <td><u>0.496±0.006</u></td> <td><b>0.712±0.011</b></td> <td><b>0.543±0.005</b></td> </tr> </tbody> </table><br><table border="1" data-bbox="370 1417 1414 1774"> <thead> <tr> <th rowspan="2">strategy</th> <th colspan="2">CNR2</th> <th colspan="2">DRD2</th> <th colspan="2">HRH3</th> </tr> <tr> <th>RMSE</th> <th>MAE</th> <th>RMSE</th> <th>MAE</th> <th>RMSE</th> <th>MAE</th> </tr> </thead> <tbody> <tr> <td>w/o pretrain</td> <td>1.216±0.012</td> <td>1.009±0.008</td> <td>0.980±0.001</td> <td>0.782±0.001</td> <td>0.819±0.001</td> <td>0.631±0.002</td> </tr> <tr> <td>video-aware</td> <td>0.978±0.025</td> <td>0.782±0.010</td> <td>0.818±0.009</td> <td>0.602±0.009</td> <td>0.732±0.008</td> <td>0.556±0.009</td> </tr> <tr> <td>direction-aware</td> <td>1.024±0.01</td> <td>0.842±0.008</td> <td>0.903±0.010</td> <td>0.700±0.009</td> <td>0.759±0.005</td> <td>0.575±0.007</td> </tr> <tr> <td>chemical-aware</td> <td>0.890±0.004</td> <td>0.698±0.002</td> <td>0.759±0.003</td> <td>0.565±0.003</td> <td><u>0.669±0.010</u></td> <td><u>0.512±0.010</u></td> </tr> <tr> <td>chemical_direction</td> <td>0.899±0.008</td> <td>0.701±0.005</td> <td>0.773±0.017</td> <td>0.579±0.007</td> <td>0.683±0.001</td> <td>0.514±0.001</td> </tr> <tr> <td>chemical_video</td> <td><u>0.874±0.012</u></td> <td><u>0.686±0.013</u></td> <td><u>0.745±0.012</u></td> <td><b>0.555±0.013</b></td> <td>0.686±0.003</td> <td>0.526±0.004</td> </tr> <tr> <td>direction_video</td> <td>0.997±0.025</td> <td>0.789±0.021</td> <td>0.832±0.005</td> <td>0.615±0.007</td> <td>0.734±0.006</td> <td>0.559±0.002</td> </tr> <tr> <td>VideoMol</td> <td><b>0.864±0.005</b></td> <td><b>0.679±0.010</b></td> <td><b>0.742±0.004</b></td> <td><u>0.556±0.005</u></td> <td><b>0.668±0.008</b></td> <td><b>0.506±0.002</b></td> </tr> </tbody> </table> <p>Furthermore, to address the reviewer’s concerns about the advantages of</p> | strategy           | 5HT1A              |                    | AA1R               |                    | AA2AR |  | RMSE | MAE | RMSE | MAE | RMSE | MAE | w/o pretrain | 0.993±0.001 | 0.804±0.002 | 0.919±0.006 | 0.755±0.008 | 1.073±0.01 | 0.882±0.013 | video-aware | 0.772±0.011 | 0.604±0.009 | 0.709±0.007 | 0.783±0.010 | 0.847±0.002 | 0.651±0.002 | direction-aware | 0.871±0.002 | 0.691±0.004 | 0.821±0.01 | 0.652±0.013 | 0.875±0.008 | 0.701±0.012 | chemical-aware | 0.736±0.012 | 0.566±0.014 | <u>0.662±0.018</u> | <b>0.494±0.015</b> | <u>0.716±0.001</u> | 0.562±0.002 | chemical_direction | 0.718±0.002 | 0.559±0.004 | 0.706±0.005 | 0.516±0.008 | 0.724±0.008 | 0.568±0.003 | chemical_video | <u>0.716±0.010</u> | <u>0.553±0.010</u> | 0.670±0.007 | 0.511±0.005 | 0.719±0.013 | <u>0.553±0.014</u> | direction_video | 0.774±0.014 | 0.603±0.015 | 0.730±0.004 | 0.553±0.002 | 0.865±0.011 | 0.672±0.005 | VideoMol | <b>0.708±0.017</b> | <b>0.547±0.015</b> | <b>0.655±0.007</b> | <u>0.496±0.006</u> | <b>0.712±0.011</b> | <b>0.543±0.005</b> | strategy | CNR2 |  | DRD2 |  | HRH3 |  | RMSE | MAE | RMSE | MAE | RMSE | MAE | w/o pretrain | 1.216±0.012 | 1.009±0.008 | 0.980±0.001 | 0.782±0.001 | 0.819±0.001 | 0.631±0.002 | video-aware | 0.978±0.025 | 0.782±0.010 | 0.818±0.009 | 0.602±0.009 | 0.732±0.008 | 0.556±0.009 | direction-aware | 1.024±0.01 | 0.842±0.008 | 0.903±0.010 | 0.700±0.009 | 0.759±0.005 | 0.575±0.007 | chemical-aware | 0.890±0.004 | 0.698±0.002 | 0.759±0.003 | 0.565±0.003 | <u>0.669±0.010</u> | <u>0.512±0.010</u> | chemical_direction | 0.899±0.008 | 0.701±0.005 | 0.773±0.017 | 0.579±0.007 | 0.683±0.001 | 0.514±0.001 | chemical_video | <u>0.874±0.012</u> | <u>0.686±0.013</u> | <u>0.745±0.012</u> | <b>0.555±0.013</b> | 0.686±0.003 | 0.526±0.004 | direction_video | 0.997±0.025 | 0.789±0.021 | 0.832±0.005 | 0.615±0.007 | 0.734±0.006 | 0.559±0.002 | VideoMol | <b>0.864±0.005</b> | <b>0.679±0.010</b> | <b>0.742±0.004</b> | <u>0.556±0.005</u> | <b>0.668±0.008</b> | <b>0.506±0.002</b> |
| strategy           | 5HT1A                                                                                                                                                                                                                                                                                                                                                                                                                                                                                                                                                                                                                                                                                                                                                                                                                                                                                                                                                                                                                                                                                                                                                                                                                                                                                                                                                                                                                                                                                                                                                                                                                                                                                                                                                                                                                                                                                                                                                                                                                                                                                                                                                                                                                                                                                                                                                                                                                                                                                                                                                                                                                                                                                                                                                                                                                                                                                                                                                                                                                                                                                                                                                                                                                                                                                                                                                                                                                                                                                                                                                                                                                                                                                                                                                                                                                                                                                                                                                                                                                                                                                                                                                                                                                                                                                                                                                                                                                                                                         |                    | AA1R               |                    | AA2AR              |                    |       |  |      |     |      |     |      |     |              |             |             |             |             |            |             |             |             |             |             |             |             |             |                 |             |             |            |             |             |             |                |             |             |                    |                    |                    |             |                    |             |             |             |             |             |             |                |                    |                    |             |             |             |                    |                 |             |             |             |             |             |             |          |                    |                    |                    |                    |                    |                    |          |      |  |      |  |      |  |      |     |      |     |      |     |              |             |             |             |             |             |             |             |             |             |             |             |             |             |                 |            |             |             |             |             |             |                |             |             |             |             |                    |                    |                    |             |             |             |             |             |             |                |                    |                    |                    |                    |             |             |                 |             |             |             |             |             |             |          |                    |                    |                    |                    |                    |                    |
|                    | RMSE                                                                                                                                                                                                                                                                                                                                                                                                                                                                                                                                                                                                                                                                                                                                                                                                                                                                                                                                                                                                                                                                                                                                                                                                                                                                                                                                                                                                                                                                                                                                                                                                                                                                                                                                                                                                                                                                                                                                                                                                                                                                                                                                                                                                                                                                                                                                                                                                                                                                                                                                                                                                                                                                                                                                                                                                                                                                                                                                                                                                                                                                                                                                                                                                                                                                                                                                                                                                                                                                                                                                                                                                                                                                                                                                                                                                                                                                                                                                                                                                                                                                                                                                                                                                                                                                                                                                                                                                                                                                          | MAE                | RMSE               | MAE                | RMSE               | MAE                |       |  |      |     |      |     |      |     |              |             |             |             |             |            |             |             |             |             |             |             |             |             |                 |             |             |            |             |             |             |                |             |             |                    |                    |                    |             |                    |             |             |             |             |             |             |                |                    |                    |             |             |             |                    |                 |             |             |             |             |             |             |          |                    |                    |                    |                    |                    |                    |          |      |  |      |  |      |  |      |     |      |     |      |     |              |             |             |             |             |             |             |             |             |             |             |             |             |             |                 |            |             |             |             |             |             |                |             |             |             |             |                    |                    |                    |             |             |             |             |             |             |                |                    |                    |                    |                    |             |             |                 |             |             |             |             |             |             |          |                    |                    |                    |                    |                    |                    |
| w/o pretrain       | 0.993±0.001                                                                                                                                                                                                                                                                                                                                                                                                                                                                                                                                                                                                                                                                                                                                                                                                                                                                                                                                                                                                                                                                                                                                                                                                                                                                                                                                                                                                                                                                                                                                                                                                                                                                                                                                                                                                                                                                                                                                                                                                                                                                                                                                                                                                                                                                                                                                                                                                                                                                                                                                                                                                                                                                                                                                                                                                                                                                                                                                                                                                                                                                                                                                                                                                                                                                                                                                                                                                                                                                                                                                                                                                                                                                                                                                                                                                                                                                                                                                                                                                                                                                                                                                                                                                                                                                                                                                                                                                                                                                   | 0.804±0.002        | 0.919±0.006        | 0.755±0.008        | 1.073±0.01         | 0.882±0.013        |       |  |      |     |      |     |      |     |              |             |             |             |             |            |             |             |             |             |             |             |             |             |                 |             |             |            |             |             |             |                |             |             |                    |                    |                    |             |                    |             |             |             |             |             |             |                |                    |                    |             |             |             |                    |                 |             |             |             |             |             |             |          |                    |                    |                    |                    |                    |                    |          |      |  |      |  |      |  |      |     |      |     |      |     |              |             |             |             |             |             |             |             |             |             |             |             |             |             |                 |            |             |             |             |             |             |                |             |             |             |             |                    |                    |                    |             |             |             |             |             |             |                |                    |                    |                    |                    |             |             |                 |             |             |             |             |             |             |          |                    |                    |                    |                    |                    |                    |
| video-aware        | 0.772±0.011                                                                                                                                                                                                                                                                                                                                                                                                                                                                                                                                                                                                                                                                                                                                                                                                                                                                                                                                                                                                                                                                                                                                                                                                                                                                                                                                                                                                                                                                                                                                                                                                                                                                                                                                                                                                                                                                                                                                                                                                                                                                                                                                                                                                                                                                                                                                                                                                                                                                                                                                                                                                                                                                                                                                                                                                                                                                                                                                                                                                                                                                                                                                                                                                                                                                                                                                                                                                                                                                                                                                                                                                                                                                                                                                                                                                                                                                                                                                                                                                                                                                                                                                                                                                                                                                                                                                                                                                                                                                   | 0.604±0.009        | 0.709±0.007        | 0.783±0.010        | 0.847±0.002        | 0.651±0.002        |       |  |      |     |      |     |      |     |              |             |             |             |             |            |             |             |             |             |             |             |             |             |                 |             |             |            |             |             |             |                |             |             |                    |                    |                    |             |                    |             |             |             |             |             |             |                |                    |                    |             |             |             |                    |                 |             |             |             |             |             |             |          |                    |                    |                    |                    |                    |                    |          |      |  |      |  |      |  |      |     |      |     |      |     |              |             |             |             |             |             |             |             |             |             |             |             |             |             |                 |            |             |             |             |             |             |                |             |             |             |             |                    |                    |                    |             |             |             |             |             |             |                |                    |                    |                    |                    |             |             |                 |             |             |             |             |             |             |          |                    |                    |                    |                    |                    |                    |
| direction-aware    | 0.871±0.002                                                                                                                                                                                                                                                                                                                                                                                                                                                                                                                                                                                                                                                                                                                                                                                                                                                                                                                                                                                                                                                                                                                                                                                                                                                                                                                                                                                                                                                                                                                                                                                                                                                                                                                                                                                                                                                                                                                                                                                                                                                                                                                                                                                                                                                                                                                                                                                                                                                                                                                                                                                                                                                                                                                                                                                                                                                                                                                                                                                                                                                                                                                                                                                                                                                                                                                                                                                                                                                                                                                                                                                                                                                                                                                                                                                                                                                                                                                                                                                                                                                                                                                                                                                                                                                                                                                                                                                                                                                                   | 0.691±0.004        | 0.821±0.01         | 0.652±0.013        | 0.875±0.008        | 0.701±0.012        |       |  |      |     |      |     |      |     |              |             |             |             |             |            |             |             |             |             |             |             |             |             |                 |             |             |            |             |             |             |                |             |             |                    |                    |                    |             |                    |             |             |             |             |             |             |                |                    |                    |             |             |             |                    |                 |             |             |             |             |             |             |          |                    |                    |                    |                    |                    |                    |          |      |  |      |  |      |  |      |     |      |     |      |     |              |             |             |             |             |             |             |             |             |             |             |             |             |             |                 |            |             |             |             |             |             |                |             |             |             |             |                    |                    |                    |             |             |             |             |             |             |                |                    |                    |                    |                    |             |             |                 |             |             |             |             |             |             |          |                    |                    |                    |                    |                    |                    |
| chemical-aware     | 0.736±0.012                                                                                                                                                                                                                                                                                                                                                                                                                                                                                                                                                                                                                                                                                                                                                                                                                                                                                                                                                                                                                                                                                                                                                                                                                                                                                                                                                                                                                                                                                                                                                                                                                                                                                                                                                                                                                                                                                                                                                                                                                                                                                                                                                                                                                                                                                                                                                                                                                                                                                                                                                                                                                                                                                                                                                                                                                                                                                                                                                                                                                                                                                                                                                                                                                                                                                                                                                                                                                                                                                                                                                                                                                                                                                                                                                                                                                                                                                                                                                                                                                                                                                                                                                                                                                                                                                                                                                                                                                                                                   | 0.566±0.014        | <u>0.662±0.018</u> | <b>0.494±0.015</b> | <u>0.716±0.001</u> | 0.562±0.002        |       |  |      |     |      |     |      |     |              |             |             |             |             |            |             |             |             |             |             |             |             |             |                 |             |             |            |             |             |             |                |             |             |                    |                    |                    |             |                    |             |             |             |             |             |             |                |                    |                    |             |             |             |                    |                 |             |             |             |             |             |             |          |                    |                    |                    |                    |                    |                    |          |      |  |      |  |      |  |      |     |      |     |      |     |              |             |             |             |             |             |             |             |             |             |             |             |             |             |                 |            |             |             |             |             |             |                |             |             |             |             |                    |                    |                    |             |             |             |             |             |             |                |                    |                    |                    |                    |             |             |                 |             |             |             |             |             |             |          |                    |                    |                    |                    |                    |                    |
| chemical_direction | 0.718±0.002                                                                                                                                                                                                                                                                                                                                                                                                                                                                                                                                                                                                                                                                                                                                                                                                                                                                                                                                                                                                                                                                                                                                                                                                                                                                                                                                                                                                                                                                                                                                                                                                                                                                                                                                                                                                                                                                                                                                                                                                                                                                                                                                                                                                                                                                                                                                                                                                                                                                                                                                                                                                                                                                                                                                                                                                                                                                                                                                                                                                                                                                                                                                                                                                                                                                                                                                                                                                                                                                                                                                                                                                                                                                                                                                                                                                                                                                                                                                                                                                                                                                                                                                                                                                                                                                                                                                                                                                                                                                   | 0.559±0.004        | 0.706±0.005        | 0.516±0.008        | 0.724±0.008        | 0.568±0.003        |       |  |      |     |      |     |      |     |              |             |             |             |             |            |             |             |             |             |             |             |             |             |                 |             |             |            |             |             |             |                |             |             |                    |                    |                    |             |                    |             |             |             |             |             |             |                |                    |                    |             |             |             |                    |                 |             |             |             |             |             |             |          |                    |                    |                    |                    |                    |                    |          |      |  |      |  |      |  |      |     |      |     |      |     |              |             |             |             |             |             |             |             |             |             |             |             |             |             |                 |            |             |             |             |             |             |                |             |             |             |             |                    |                    |                    |             |             |             |             |             |             |                |                    |                    |                    |                    |             |             |                 |             |             |             |             |             |             |          |                    |                    |                    |                    |                    |                    |
| chemical_video     | <u>0.716±0.010</u>                                                                                                                                                                                                                                                                                                                                                                                                                                                                                                                                                                                                                                                                                                                                                                                                                                                                                                                                                                                                                                                                                                                                                                                                                                                                                                                                                                                                                                                                                                                                                                                                                                                                                                                                                                                                                                                                                                                                                                                                                                                                                                                                                                                                                                                                                                                                                                                                                                                                                                                                                                                                                                                                                                                                                                                                                                                                                                                                                                                                                                                                                                                                                                                                                                                                                                                                                                                                                                                                                                                                                                                                                                                                                                                                                                                                                                                                                                                                                                                                                                                                                                                                                                                                                                                                                                                                                                                                                                                            | <u>0.553±0.010</u> | 0.670±0.007        | 0.511±0.005        | 0.719±0.013        | <u>0.553±0.014</u> |       |  |      |     |      |     |      |     |              |             |             |             |             |            |             |             |             |             |             |             |             |             |                 |             |             |            |             |             |             |                |             |             |                    |                    |                    |             |                    |             |             |             |             |             |             |                |                    |                    |             |             |             |                    |                 |             |             |             |             |             |             |          |                    |                    |                    |                    |                    |                    |          |      |  |      |  |      |  |      |     |      |     |      |     |              |             |             |             |             |             |             |             |             |             |             |             |             |             |                 |            |             |             |             |             |             |                |             |             |             |             |                    |                    |                    |             |             |             |             |             |             |                |                    |                    |                    |                    |             |             |                 |             |             |             |             |             |             |          |                    |                    |                    |                    |                    |                    |
| direction_video    | 0.774±0.014                                                                                                                                                                                                                                                                                                                                                                                                                                                                                                                                                                                                                                                                                                                                                                                                                                                                                                                                                                                                                                                                                                                                                                                                                                                                                                                                                                                                                                                                                                                                                                                                                                                                                                                                                                                                                                                                                                                                                                                                                                                                                                                                                                                                                                                                                                                                                                                                                                                                                                                                                                                                                                                                                                                                                                                                                                                                                                                                                                                                                                                                                                                                                                                                                                                                                                                                                                                                                                                                                                                                                                                                                                                                                                                                                                                                                                                                                                                                                                                                                                                                                                                                                                                                                                                                                                                                                                                                                                                                   | 0.603±0.015        | 0.730±0.004        | 0.553±0.002        | 0.865±0.011        | 0.672±0.005        |       |  |      |     |      |     |      |     |              |             |             |             |             |            |             |             |             |             |             |             |             |             |                 |             |             |            |             |             |             |                |             |             |                    |                    |                    |             |                    |             |             |             |             |             |             |                |                    |                    |             |             |             |                    |                 |             |             |             |             |             |             |          |                    |                    |                    |                    |                    |                    |          |      |  |      |  |      |  |      |     |      |     |      |     |              |             |             |             |             |             |             |             |             |             |             |             |             |             |                 |            |             |             |             |             |             |                |             |             |             |             |                    |                    |                    |             |             |             |             |             |             |                |                    |                    |                    |                    |             |             |                 |             |             |             |             |             |             |          |                    |                    |                    |                    |                    |                    |
| VideoMol           | <b>0.708±0.017</b>                                                                                                                                                                                                                                                                                                                                                                                                                                                                                                                                                                                                                                                                                                                                                                                                                                                                                                                                                                                                                                                                                                                                                                                                                                                                                                                                                                                                                                                                                                                                                                                                                                                                                                                                                                                                                                                                                                                                                                                                                                                                                                                                                                                                                                                                                                                                                                                                                                                                                                                                                                                                                                                                                                                                                                                                                                                                                                                                                                                                                                                                                                                                                                                                                                                                                                                                                                                                                                                                                                                                                                                                                                                                                                                                                                                                                                                                                                                                                                                                                                                                                                                                                                                                                                                                                                                                                                                                                                                            | <b>0.547±0.015</b> | <b>0.655±0.007</b> | <u>0.496±0.006</u> | <b>0.712±0.011</b> | <b>0.543±0.005</b> |       |  |      |     |      |     |      |     |              |             |             |             |             |            |             |             |             |             |             |             |             |             |                 |             |             |            |             |             |             |                |             |             |                    |                    |                    |             |                    |             |             |             |             |             |             |                |                    |                    |             |             |             |                    |                 |             |             |             |             |             |             |          |                    |                    |                    |                    |                    |                    |          |      |  |      |  |      |  |      |     |      |     |      |     |              |             |             |             |             |             |             |             |             |             |             |             |             |             |                 |            |             |             |             |             |             |                |             |             |             |             |                    |                    |                    |             |             |             |             |             |             |                |                    |                    |                    |                    |             |             |                 |             |             |             |             |             |             |          |                    |                    |                    |                    |                    |                    |
| strategy           | CNR2                                                                                                                                                                                                                                                                                                                                                                                                                                                                                                                                                                                                                                                                                                                                                                                                                                                                                                                                                                                                                                                                                                                                                                                                                                                                                                                                                                                                                                                                                                                                                                                                                                                                                                                                                                                                                                                                                                                                                                                                                                                                                                                                                                                                                                                                                                                                                                                                                                                                                                                                                                                                                                                                                                                                                                                                                                                                                                                                                                                                                                                                                                                                                                                                                                                                                                                                                                                                                                                                                                                                                                                                                                                                                                                                                                                                                                                                                                                                                                                                                                                                                                                                                                                                                                                                                                                                                                                                                                                                          |                    | DRD2               |                    | HRH3               |                    |       |  |      |     |      |     |      |     |              |             |             |             |             |            |             |             |             |             |             |             |             |             |                 |             |             |            |             |             |             |                |             |             |                    |                    |                    |             |                    |             |             |             |             |             |             |                |                    |                    |             |             |             |                    |                 |             |             |             |             |             |             |          |                    |                    |                    |                    |                    |                    |          |      |  |      |  |      |  |      |     |      |     |      |     |              |             |             |             |             |             |             |             |             |             |             |             |             |             |                 |            |             |             |             |             |             |                |             |             |             |             |                    |                    |                    |             |             |             |             |             |             |                |                    |                    |                    |                    |             |             |                 |             |             |             |             |             |             |          |                    |                    |                    |                    |                    |                    |
|                    | RMSE                                                                                                                                                                                                                                                                                                                                                                                                                                                                                                                                                                                                                                                                                                                                                                                                                                                                                                                                                                                                                                                                                                                                                                                                                                                                                                                                                                                                                                                                                                                                                                                                                                                                                                                                                                                                                                                                                                                                                                                                                                                                                                                                                                                                                                                                                                                                                                                                                                                                                                                                                                                                                                                                                                                                                                                                                                                                                                                                                                                                                                                                                                                                                                                                                                                                                                                                                                                                                                                                                                                                                                                                                                                                                                                                                                                                                                                                                                                                                                                                                                                                                                                                                                                                                                                                                                                                                                                                                                                                          | MAE                | RMSE               | MAE                | RMSE               | MAE                |       |  |      |     |      |     |      |     |              |             |             |             |             |            |             |             |             |             |             |             |             |             |                 |             |             |            |             |             |             |                |             |             |                    |                    |                    |             |                    |             |             |             |             |             |             |                |                    |                    |             |             |             |                    |                 |             |             |             |             |             |             |          |                    |                    |                    |                    |                    |                    |          |      |  |      |  |      |  |      |     |      |     |      |     |              |             |             |             |             |             |             |             |             |             |             |             |             |             |                 |            |             |             |             |             |             |                |             |             |             |             |                    |                    |                    |             |             |             |             |             |             |                |                    |                    |                    |                    |             |             |                 |             |             |             |             |             |             |          |                    |                    |                    |                    |                    |                    |
| w/o pretrain       | 1.216±0.012                                                                                                                                                                                                                                                                                                                                                                                                                                                                                                                                                                                                                                                                                                                                                                                                                                                                                                                                                                                                                                                                                                                                                                                                                                                                                                                                                                                                                                                                                                                                                                                                                                                                                                                                                                                                                                                                                                                                                                                                                                                                                                                                                                                                                                                                                                                                                                                                                                                                                                                                                                                                                                                                                                                                                                                                                                                                                                                                                                                                                                                                                                                                                                                                                                                                                                                                                                                                                                                                                                                                                                                                                                                                                                                                                                                                                                                                                                                                                                                                                                                                                                                                                                                                                                                                                                                                                                                                                                                                   | 1.009±0.008        | 0.980±0.001        | 0.782±0.001        | 0.819±0.001        | 0.631±0.002        |       |  |      |     |      |     |      |     |              |             |             |             |             |            |             |             |             |             |             |             |             |             |                 |             |             |            |             |             |             |                |             |             |                    |                    |                    |             |                    |             |             |             |             |             |             |                |                    |                    |             |             |             |                    |                 |             |             |             |             |             |             |          |                    |                    |                    |                    |                    |                    |          |      |  |      |  |      |  |      |     |      |     |      |     |              |             |             |             |             |             |             |             |             |             |             |             |             |             |                 |            |             |             |             |             |             |                |             |             |             |             |                    |                    |                    |             |             |             |             |             |             |                |                    |                    |                    |                    |             |             |                 |             |             |             |             |             |             |          |                    |                    |                    |                    |                    |                    |
| video-aware        | 0.978±0.025                                                                                                                                                                                                                                                                                                                                                                                                                                                                                                                                                                                                                                                                                                                                                                                                                                                                                                                                                                                                                                                                                                                                                                                                                                                                                                                                                                                                                                                                                                                                                                                                                                                                                                                                                                                                                                                                                                                                                                                                                                                                                                                                                                                                                                                                                                                                                                                                                                                                                                                                                                                                                                                                                                                                                                                                                                                                                                                                                                                                                                                                                                                                                                                                                                                                                                                                                                                                                                                                                                                                                                                                                                                                                                                                                                                                                                                                                                                                                                                                                                                                                                                                                                                                                                                                                                                                                                                                                                                                   | 0.782±0.010        | 0.818±0.009        | 0.602±0.009        | 0.732±0.008        | 0.556±0.009        |       |  |      |     |      |     |      |     |              |             |             |             |             |            |             |             |             |             |             |             |             |             |                 |             |             |            |             |             |             |                |             |             |                    |                    |                    |             |                    |             |             |             |             |             |             |                |                    |                    |             |             |             |                    |                 |             |             |             |             |             |             |          |                    |                    |                    |                    |                    |                    |          |      |  |      |  |      |  |      |     |      |     |      |     |              |             |             |             |             |             |             |             |             |             |             |             |             |             |                 |            |             |             |             |             |             |                |             |             |             |             |                    |                    |                    |             |             |             |             |             |             |                |                    |                    |                    |                    |             |             |                 |             |             |             |             |             |             |          |                    |                    |                    |                    |                    |                    |
| direction-aware    | 1.024±0.01                                                                                                                                                                                                                                                                                                                                                                                                                                                                                                                                                                                                                                                                                                                                                                                                                                                                                                                                                                                                                                                                                                                                                                                                                                                                                                                                                                                                                                                                                                                                                                                                                                                                                                                                                                                                                                                                                                                                                                                                                                                                                                                                                                                                                                                                                                                                                                                                                                                                                                                                                                                                                                                                                                                                                                                                                                                                                                                                                                                                                                                                                                                                                                                                                                                                                                                                                                                                                                                                                                                                                                                                                                                                                                                                                                                                                                                                                                                                                                                                                                                                                                                                                                                                                                                                                                                                                                                                                                                                    | 0.842±0.008        | 0.903±0.010        | 0.700±0.009        | 0.759±0.005        | 0.575±0.007        |       |  |      |     |      |     |      |     |              |             |             |             |             |            |             |             |             |             |             |             |             |             |                 |             |             |            |             |             |             |                |             |             |                    |                    |                    |             |                    |             |             |             |             |             |             |                |                    |                    |             |             |             |                    |                 |             |             |             |             |             |             |          |                    |                    |                    |                    |                    |                    |          |      |  |      |  |      |  |      |     |      |     |      |     |              |             |             |             |             |             |             |             |             |             |             |             |             |             |                 |            |             |             |             |             |             |                |             |             |             |             |                    |                    |                    |             |             |             |             |             |             |                |                    |                    |                    |                    |             |             |                 |             |             |             |             |             |             |          |                    |                    |                    |                    |                    |                    |
| chemical-aware     | 0.890±0.004                                                                                                                                                                                                                                                                                                                                                                                                                                                                                                                                                                                                                                                                                                                                                                                                                                                                                                                                                                                                                                                                                                                                                                                                                                                                                                                                                                                                                                                                                                                                                                                                                                                                                                                                                                                                                                                                                                                                                                                                                                                                                                                                                                                                                                                                                                                                                                                                                                                                                                                                                                                                                                                                                                                                                                                                                                                                                                                                                                                                                                                                                                                                                                                                                                                                                                                                                                                                                                                                                                                                                                                                                                                                                                                                                                                                                                                                                                                                                                                                                                                                                                                                                                                                                                                                                                                                                                                                                                                                   | 0.698±0.002        | 0.759±0.003        | 0.565±0.003        | <u>0.669±0.010</u> | <u>0.512±0.010</u> |       |  |      |     |      |     |      |     |              |             |             |             |             |            |             |             |             |             |             |             |             |             |                 |             |             |            |             |             |             |                |             |             |                    |                    |                    |             |                    |             |             |             |             |             |             |                |                    |                    |             |             |             |                    |                 |             |             |             |             |             |             |          |                    |                    |                    |                    |                    |                    |          |      |  |      |  |      |  |      |     |      |     |      |     |              |             |             |             |             |             |             |             |             |             |             |             |             |             |                 |            |             |             |             |             |             |                |             |             |             |             |                    |                    |                    |             |             |             |             |             |             |                |                    |                    |                    |                    |             |             |                 |             |             |             |             |             |             |          |                    |                    |                    |                    |                    |                    |
| chemical_direction | 0.899±0.008                                                                                                                                                                                                                                                                                                                                                                                                                                                                                                                                                                                                                                                                                                                                                                                                                                                                                                                                                                                                                                                                                                                                                                                                                                                                                                                                                                                                                                                                                                                                                                                                                                                                                                                                                                                                                                                                                                                                                                                                                                                                                                                                                                                                                                                                                                                                                                                                                                                                                                                                                                                                                                                                                                                                                                                                                                                                                                                                                                                                                                                                                                                                                                                                                                                                                                                                                                                                                                                                                                                                                                                                                                                                                                                                                                                                                                                                                                                                                                                                                                                                                                                                                                                                                                                                                                                                                                                                                                                                   | 0.701±0.005        | 0.773±0.017        | 0.579±0.007        | 0.683±0.001        | 0.514±0.001        |       |  |      |     |      |     |      |     |              |             |             |             |             |            |             |             |             |             |             |             |             |             |                 |             |             |            |             |             |             |                |             |             |                    |                    |                    |             |                    |             |             |             |             |             |             |                |                    |                    |             |             |             |                    |                 |             |             |             |             |             |             |          |                    |                    |                    |                    |                    |                    |          |      |  |      |  |      |  |      |     |      |     |      |     |              |             |             |             |             |             |             |             |             |             |             |             |             |             |                 |            |             |             |             |             |             |                |             |             |             |             |                    |                    |                    |             |             |             |             |             |             |                |                    |                    |                    |                    |             |             |                 |             |             |             |             |             |             |          |                    |                    |                    |                    |                    |                    |
| chemical_video     | <u>0.874±0.012</u>                                                                                                                                                                                                                                                                                                                                                                                                                                                                                                                                                                                                                                                                                                                                                                                                                                                                                                                                                                                                                                                                                                                                                                                                                                                                                                                                                                                                                                                                                                                                                                                                                                                                                                                                                                                                                                                                                                                                                                                                                                                                                                                                                                                                                                                                                                                                                                                                                                                                                                                                                                                                                                                                                                                                                                                                                                                                                                                                                                                                                                                                                                                                                                                                                                                                                                                                                                                                                                                                                                                                                                                                                                                                                                                                                                                                                                                                                                                                                                                                                                                                                                                                                                                                                                                                                                                                                                                                                                                            | <u>0.686±0.013</u> | <u>0.745±0.012</u> | <b>0.555±0.013</b> | 0.686±0.003        | 0.526±0.004        |       |  |      |     |      |     |      |     |              |             |             |             |             |            |             |             |             |             |             |             |             |             |                 |             |             |            |             |             |             |                |             |             |                    |                    |                    |             |                    |             |             |             |             |             |             |                |                    |                    |             |             |             |                    |                 |             |             |             |             |             |             |          |                    |                    |                    |                    |                    |                    |          |      |  |      |  |      |  |      |     |      |     |      |     |              |             |             |             |             |             |             |             |             |             |             |             |             |             |                 |            |             |             |             |             |             |                |             |             |             |             |                    |                    |                    |             |             |             |             |             |             |                |                    |                    |                    |                    |             |             |                 |             |             |             |             |             |             |          |                    |                    |                    |                    |                    |                    |
| direction_video    | 0.997±0.025                                                                                                                                                                                                                                                                                                                                                                                                                                                                                                                                                                                                                                                                                                                                                                                                                                                                                                                                                                                                                                                                                                                                                                                                                                                                                                                                                                                                                                                                                                                                                                                                                                                                                                                                                                                                                                                                                                                                                                                                                                                                                                                                                                                                                                                                                                                                                                                                                                                                                                                                                                                                                                                                                                                                                                                                                                                                                                                                                                                                                                                                                                                                                                                                                                                                                                                                                                                                                                                                                                                                                                                                                                                                                                                                                                                                                                                                                                                                                                                                                                                                                                                                                                                                                                                                                                                                                                                                                                                                   | 0.789±0.021        | 0.832±0.005        | 0.615±0.007        | 0.734±0.006        | 0.559±0.002        |       |  |      |     |      |     |      |     |              |             |             |             |             |            |             |             |             |             |             |             |             |             |                 |             |             |            |             |             |             |                |             |             |                    |                    |                    |             |                    |             |             |             |             |             |             |                |                    |                    |             |             |             |                    |                 |             |             |             |             |             |             |          |                    |                    |                    |                    |                    |                    |          |      |  |      |  |      |  |      |     |      |     |      |     |              |             |             |             |             |             |             |             |             |             |             |             |             |             |                 |            |             |             |             |             |             |                |             |             |             |             |                    |                    |                    |             |             |             |             |             |             |                |                    |                    |                    |                    |             |             |                 |             |             |             |             |             |             |          |                    |                    |                    |                    |                    |                    |
| VideoMol           | <b>0.864±0.005</b>                                                                                                                                                                                                                                                                                                                                                                                                                                                                                                                                                                                                                                                                                                                                                                                                                                                                                                                                                                                                                                                                                                                                                                                                                                                                                                                                                                                                                                                                                                                                                                                                                                                                                                                                                                                                                                                                                                                                                                                                                                                                                                                                                                                                                                                                                                                                                                                                                                                                                                                                                                                                                                                                                                                                                                                                                                                                                                                                                                                                                                                                                                                                                                                                                                                                                                                                                                                                                                                                                                                                                                                                                                                                                                                                                                                                                                                                                                                                                                                                                                                                                                                                                                                                                                                                                                                                                                                                                                                            | <b>0.679±0.010</b> | <b>0.742±0.004</b> | <u>0.556±0.005</u> | <b>0.668±0.008</b> | <b>0.506±0.002</b> |       |  |      |     |      |     |      |     |              |             |             |             |             |            |             |             |             |             |             |             |             |             |                 |             |             |            |             |             |             |                |             |             |                    |                    |                    |             |                    |             |             |             |             |             |             |                |                    |                    |             |             |             |                    |                 |             |             |             |             |             |             |          |                    |                    |                    |                    |                    |                    |          |      |  |      |  |      |  |      |     |      |     |      |     |              |             |             |             |             |             |             |             |             |             |             |             |             |             |                 |            |             |             |             |             |             |                |             |             |             |             |                    |                    |                    |             |             |             |             |             |             |                |                    |                    |                    |                    |             |             |                 |             |             |             |             |             |             |          |                    |                    |                    |                    |                    |                    |

3D representation, we evaluated the representation advantages of 3D-based molecular videos without using any self-supervised tasks and fingerprint information. It is well known that the development of drug discovery depends on the understanding of basic information about molecules. Here, we use several of the most representative methods (such as GCN, GIN, EGNN, and the representation used by ImageMol) to inspect the model's ability to understand the 8 basic attributes of molecules, including molecular weight, MolLogP, MolMR, BalabanJ, NumHAcceptors, NumHDonors, NumValenceElectrons and TPSA.

We randomly collected 10,000 molecules from the pre-training dataset and use exactly the same experimental setup for a fair comparison. In detail, we split the training set, validation set, and test set using a ratio of 8:1:1 and report the results on the test set based on the best validation set score. As shown in **Extended Table 1** (the Revised Supplemental Table 1) below, we found that VideoMol based on only one frame outperformed traditional 2D graph-based methods, the 3D-based graph method and the 2D image-based method, revealing the advantage of 3D representation. Specifically, compared with the second-place ImageMol without pre-training, the performance of video-1frame improved by 11%. When we utilized all video frames (video-60frame), the performance was further significantly improved from 12.469 to 7.55 with a 66% improvement rate.

Overall, the proposed 3D representation (whether based on a single frame image or a 60-frame video) has obvious advantages over existing representations. In addition, integrating physical dynamics or conformational changes from 3D ligand-receptor structures or models (i.e., alphaFold3 [1]) may improve performance of ViodeMol further. We have added these new results and more detailed explanations in the revised manuscript.

**Extended Table 1** (the Revised Supplemental Table 1). The ability of VideoMol to distinguish different conformers. The percentile interval refers to sorting all RMSD values from small to large and selecting the value corresponding to the percentile interval.

|             | modality            | model    | use conformer? | prop         |
|-------------|---------------------|----------|----------------|--------------|
| graph-based | 2D graph            | GCN      | x              | 62.304       |
|             |                     | GIN      | x              | 62.980       |
|             |                     | EGNN     | x              | 17.418       |
|             | 3D graph            | EGNN     | √              | 16.684       |
| image-based | image from imagemol | ResNet18 | x              | 12.469       |
|             | video-1frame        | ResNet18 | √              | 11.237       |
|             | video-5frame        | ResNet18 | √              | 8.088        |
|             | video-60frame       | ViT      | √              | <b>7.511</b> |

#### Reference

[1] Abramson J, Adler J, Dunger J, et al. Accurate structure prediction of biomolecular interactions with AlphaFold 3[J]. Nature, 2024: 1-3.

**Ref 2.5 – “This difference may be due to data leak in the high ROC-AUC train-test data, inflating the apparent generalizability” –**

|                  |                                                                                                                                                                                                                                                                                                                                                                                                                                                                                                                                                                                                                                                                                                                                             |
|------------------|---------------------------------------------------------------------------------------------------------------------------------------------------------------------------------------------------------------------------------------------------------------------------------------------------------------------------------------------------------------------------------------------------------------------------------------------------------------------------------------------------------------------------------------------------------------------------------------------------------------------------------------------------------------------------------------------------------------------------------------------|
| Reviewer Comment | Feedback to the methodology: the splits used in this work would not stop data leaking from train to validation sets and scaffold balancing might not be enough. Indeed, we see a hint of the issue in the COX examples where training data from ChEMBL in 8:1:1 split gave high ROC-AUC>0.9, but when the model was tested against MedChemExpress data, only less than 40% of inhibitors are successfully identified. This difference may be due to data leak in the high ROC-AUC train-test data, inflating the apparent generalizability. In general, if authors would like to claim generalizability, more attention to the split strategy, overlap between data points is needed according to certain similarity metric will be needed. |
| Author Response  | We carefully examined COX-1 and COX-2 datasets from ChEMBL. We confirmed that the training, validation, and test sets did not contain any overlapping molecules, <b>without any data leaking issue</b> . In the actual virtual screening or new drug development process (termed external validation set), the performance value will not be very high due to several common factors, such as low similarity or activity cliff between the training data and the drugs in the external validation sets to be virtually screened. We confirmed that there was no data leak issues and we have added more explanations in the revised manuscript.                                                                                             |

**Ref 2.6 – “Describe the computational requirements for pre-training and various downstream tasks” –**

|                                 |                                                                                                                                                                                                                                                                                                                                                                                                                                                                     |
|---------------------------------|---------------------------------------------------------------------------------------------------------------------------------------------------------------------------------------------------------------------------------------------------------------------------------------------------------------------------------------------------------------------------------------------------------------------------------------------------------------------|
| Reviewer Comment                | Some of the tasks in the work are for high-throughput applications (e.g. virtual screening). In such cases the trade-off between accuracy and compute becomes important. The proposed method should clearly state the compute needs for pretraining and various downstream tasks. Because it works with video, compared to much smaller atomic position files, memory needs should be highlighted too.                                                              |
| Author Response                 | We have evaluated the computational requirements of the proposed VideoMol in pre-training, fine-tuning, and virtual screening stages. We found that VideoMol overall is highly cost-effective and time-effective in multiple tasks as discussed as below. We have added more detailed explanations about the computational requirements of the proposed VideoMol in pre-training, fine-tuning, and virtual screening stages in the revised manuscript.              |
| Excerpt from Revised Manuscript | <b>C.3 Computational requirements of VideoMol</b><br>Here, we detail the computational requirements for the pre-training, fine-tuning, and virtual screening stages in <b>Supplementary Table 36</b> . In the pre-training phase ( <b>Supplementary Table 36a</b> ), VideoMol uses 256 frames in each batch for training and it requires <u>37G of GPU memory</u> and takes about 9 hours to complete 1 epoch on <u>2 million molecular videos with 60 frames</u> . |

Next, we used 10,000 molecules to test the impact of different batch sizes (#frame/batch) on memory and training speed in **Supplementary Table 36b**. We find that fine-tuning does not occupy a large amount of memory and it only requires at least 2.3G of GPU memory. Finally, we evaluate the computational requirements when performing virtual screening on 1 million molecules in **Supplementary Table 36c**. We find that it only takes 9 hours when using all frames during virtual screening for 1 million molecules.

**Supplementary Table 36:** The computational requirements in the pre-training, fine-tuning, and screening stages. #frame/batch represents the number of frames in a batch. #samples represent the total number of molecules. #frame/video indicate how many frames of a video to select for inference.

| (a) The computational requirements in the pre-training stage. |              |               |                   |                                                      |                                                         |
|---------------------------------------------------------------|--------------|---------------|-------------------|------------------------------------------------------|---------------------------------------------------------|
| #samples                                                      | #frame/batch | GPU memory    | Training time     | Server                                               |                                                         |
| 2 million                                                     | 256          | ~37G          | ~9 hours/epoch    | CPU: Intel 6248R 48C@3.0GHz; GPU: A100 (40G)         |                                                         |
| (b) The computational requirements in the fine-tuning stage.  |              |               |                   |                                                      |                                                         |
| #samples                                                      | #frame/batch | GPU memory    | Training time     | Server                                               |                                                         |
| 10,000                                                        | 8            | 2.3G          | ~26 minutes/epoch | CPU: 13th Gen Intel® Core™ i7-13700K<br>GPU: 4090 Ti |                                                         |
|                                                               | 16           | 2.6G          | ~15 minutes/epoch |                                                      |                                                         |
|                                                               | 32           | 3.2G          | ~12 minutes/epoch |                                                      |                                                         |
|                                                               | 64           | 4.3G          | ~12 minutes/epoch |                                                      |                                                         |
|                                                               | 128          | 6.5G          | ~12 minutes/epoch |                                                      |                                                         |
|                                                               | 256          | 10.7G         | ~12 minutes/epoch |                                                      |                                                         |
| (c) The computational requirements in the screening stage.    |              |               |                   |                                                      |                                                         |
| #samples                                                      | #frame/video | #videos/batch | inference time    | GPU memory                                           | Server                                                  |
| 1 million                                                     | 1            | 480           | ~9 minutes        | 17.7 G                                               | CPU: 13th Gen Intel®<br>Core™ i7-13700K<br>GPU: 4090 Ti |
|                                                               | 5            | 96            | ~48 minutes       |                                                      |                                                         |
|                                                               | 10           | 48            | ~90 minutes       |                                                      |                                                         |
|                                                               | 20           | 24            | ~3 hours          |                                                      |                                                         |
|                                                               | 30           | 16            | ~4.5 hours        |                                                      |                                                         |
|                                                               | 60           | 8             | ~9 hours          |                                                      |                                                         |

### Ref 2.7 – “Correct Minor typos” –

|                  |                                                                                                                |
|------------------|----------------------------------------------------------------------------------------------------------------|
| Reviewer Comment | minor typos in text, highlighting one that is on figure in case it escapes proofreading: angel -> angle Fig 1b |
| Author Response  | We have fixed this typo and further polish English of the entire manuscript.                                   |



## **REVIEWERS' COMMENTS**

### **Reviewer #2 (Remarks to the Author):**

I have carefully reviewed the detailed rebuttal and the revised manuscript. I am pleased to see that the authors have addressed all of the concerns I raised in my initial review. The additional experiments and clarifications provided have significantly strengthened the support for the claims. I am satisfied with the revisions and believe that the manuscript is now ready for publishing.

### **Reviewer #2 (Remarks on code availability):**

The code is well organised, and the authors made the effort to provide guidelines for setting up an environment and running VideoMol.

### **Reviewer #4 (Remarks to the Author):**

I have assessed the comments from the authors to Reviewers 3 concerns, and I believe the authors has responded well to the comments
